# Supplementary material
Source: PubMed Central journal article supplement (PMC7265335)
Supplement: NIHMS1592492-supplement-1.pdf [file NIHMS1592492-supplement-1.pdf]

## SUPPLEMENTARY MATERIALS

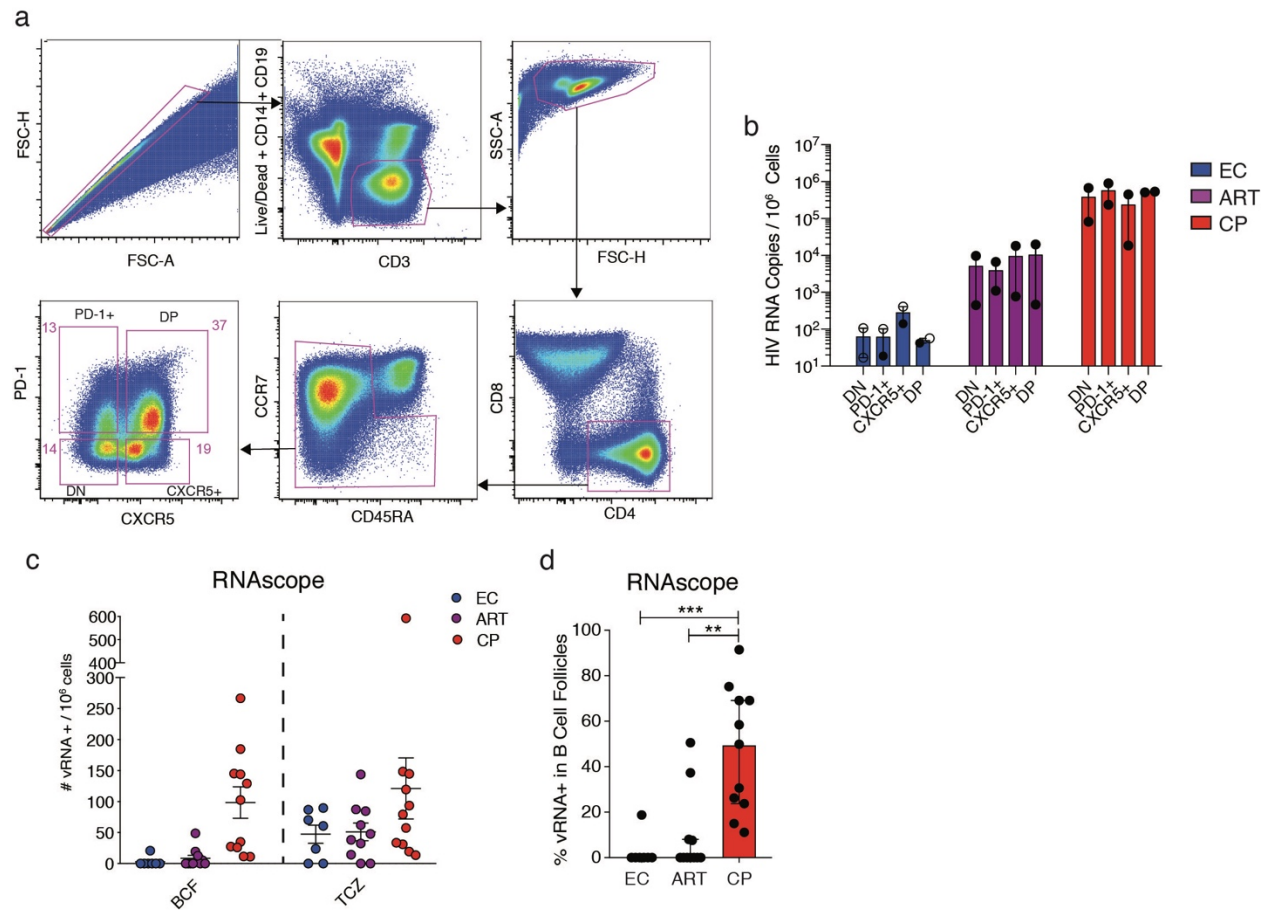

**Supplementary Figure 1.** HIV RNA is present in B cell follicles and the T cell zone in LNs. **a**, Gating scheme used to sort LN-derived CD4<sup>+</sup> T cell subsets for viral quantification. Representative flow plots were generated from the LNs of one EC. **b**, Quantification of HIV RNA in LN-derived CD4<sup>+</sup> T cell subsets by qPCR. The limit of detection value was used in the absence of detectable HIV RNA (open circles). **c**, Percent frequency of vRNA<sup>+</sup> cells in B cell follicles, as determined by RNAscope. Error bars represent mean and SEM (**b**) or median and interquartile range (**c**). Significance was determined using a two-way ANOVA (**b**) or the Kruskal-Wallis test with Dunn's correction (**c**). \*\* p < 0.01, \*\*\* p < 0.001.

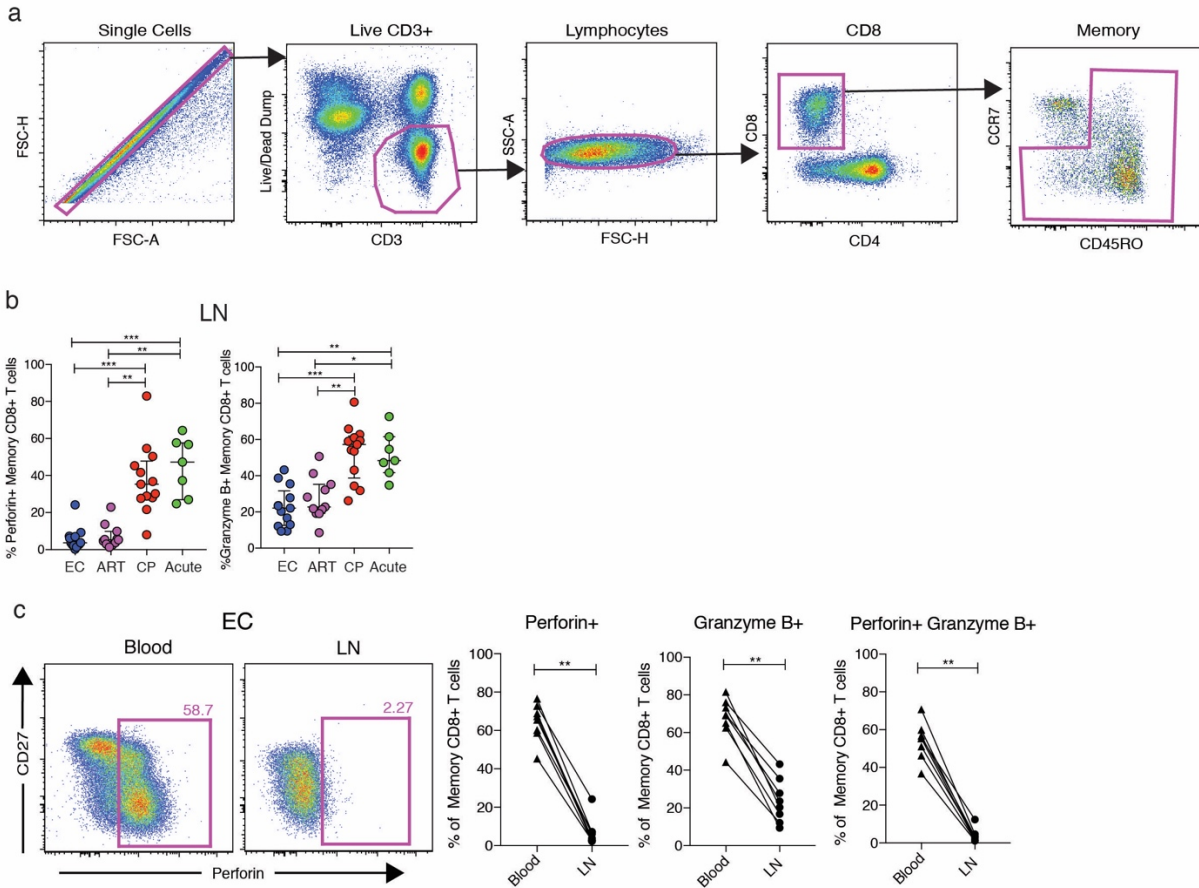

**Supplementary Figure 2.** CD8<sup>+</sup> T cells from the LNs of ECs express low levels of perforin and granzyme B. **a**, Gating scheme used in flow cytometry experiments. Representative plots were generated from the LNs of one EC. All flow cytometry data shown in this report were pre-gated on memory CD8<sup>+</sup> T cells unless specified otherwise. **b**, Quantification of perforin and granzyme B expression in LN-derived CD8<sup>+</sup> T cells across donor groups. **c**, Representative flow plots showing perforin and granzyme B expression in matched peripheral blood and LN-derived CD8<sup>+</sup> T cells from one EC (left) and data quantification across donor groups (right). Significance was determined using the Kruskal-Wallis test with Dunn's correction (**b**) or the Wilcoxon matched-pairs signed rank test (**c**). \*  $p < 0.05$ , \*\*  $p < 0.01$ , \*\*\*  $p < 0.001$ .

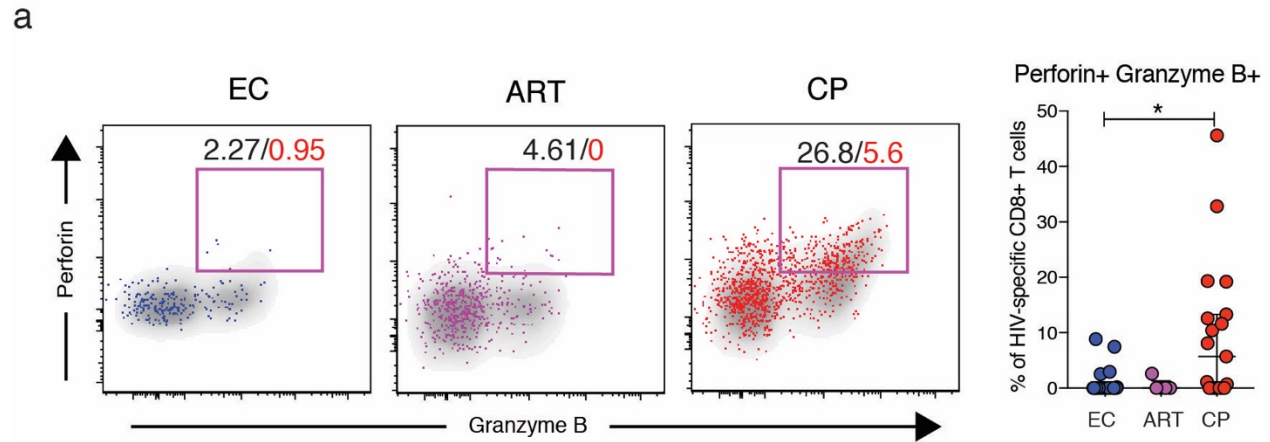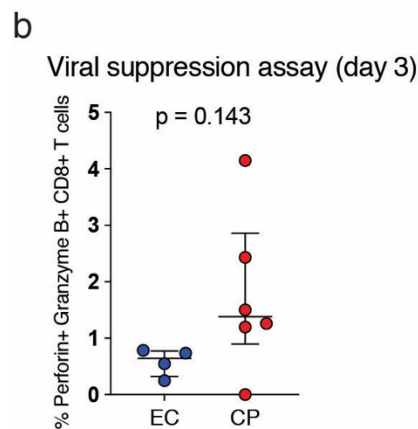

**Supplementary Figure 3.** CD8<sup>+</sup> T cells from the LNs of ECs do not upregulate cytolytic molecules in response to cognate antigen exposure. **a**, LNMCs were stimulated for 6 hours with peptides representing optimal epitopes derived from HIV. Perforin and granzyme B were quantified in HIV-specific CD8<sup>+</sup> T cells. Colored dots in the representative flow plots (left) depict HIV-specific CD8<sup>+</sup> T cells defined by the expression of at least one of the following markers: CD107a, IFN $\gamma$ , TNF, MIP-1 $\beta$ , or IL-2. Black and red numbers indicate the frequency of HIV-specific CD8<sup>+</sup> T cells before and after background subtraction, respectively. **b**, Frequency of LN-derived perforin<sup>+</sup> granzyme B<sup>+</sup> CD8<sup>+</sup> T cells after 3 days in culture with HIV-infected autologous LN-derived CD4<sup>+</sup> T cells, as shown in **Fig. 1c**. Significance was determined using the Kruskal-Wallis test with Dunn's correction (**a**) or an unpaired t-test (**b**). \*  $p < 0.05$ .

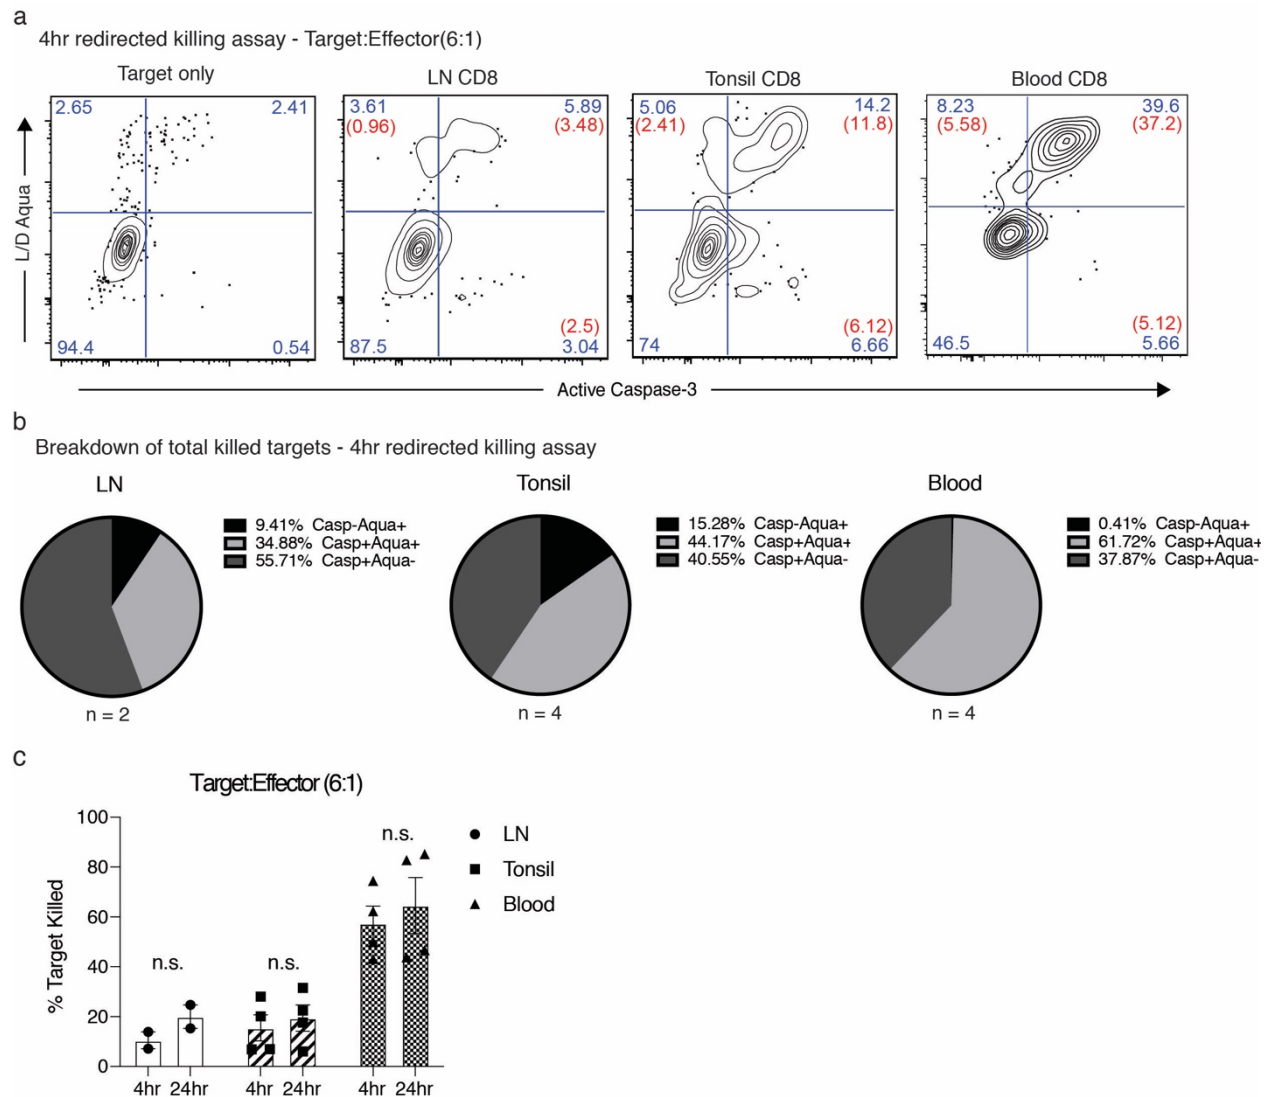

**Supplementary Figure 4.** Active-caspase 3 detection captures the majority of killed targets. CD8<sup>+</sup> T cells isolated from LNs, tonsils, and blood of HIV<sup>-</sup> individuals and were incubated with anti-CD3-coated P815 cells at a ratio of effector:target(6:1) for 4 and 24 hours. **a**, Representative flow plots showing the detection of killed target cells by both live/dead Aqua (L/D Aqua) and active-caspase 3. Numbers represent frequencies of cells within a specific gate before (blue) or after (red) background subtraction. **b**, Breakdown of the total killing after 4 hours. Casp: active-caspase 3, Aqua: live/dead Aqua dye. Each pie chart represents 100% of total killing after background

subtraction. **c**, Summary plot of redirected killing assays at 4hr and 24hr. %Target killed is the sum of Casp<sup>-</sup>Aqua<sup>+</sup>, Casp<sup>+</sup>Aqua<sup>+</sup>, and Casp<sup>+</sup>Aqua<sup>-</sup> after background subtraction. Error bars show means and SEMs. Significance was determined using two-way ANOVA (**b**). n.s. not statistically significant.

a

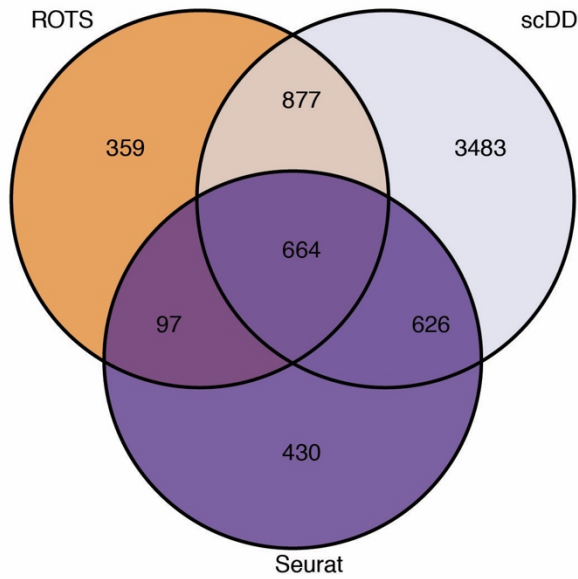

b

Top 25 GO terms enriched in the list of differentially expressed genes

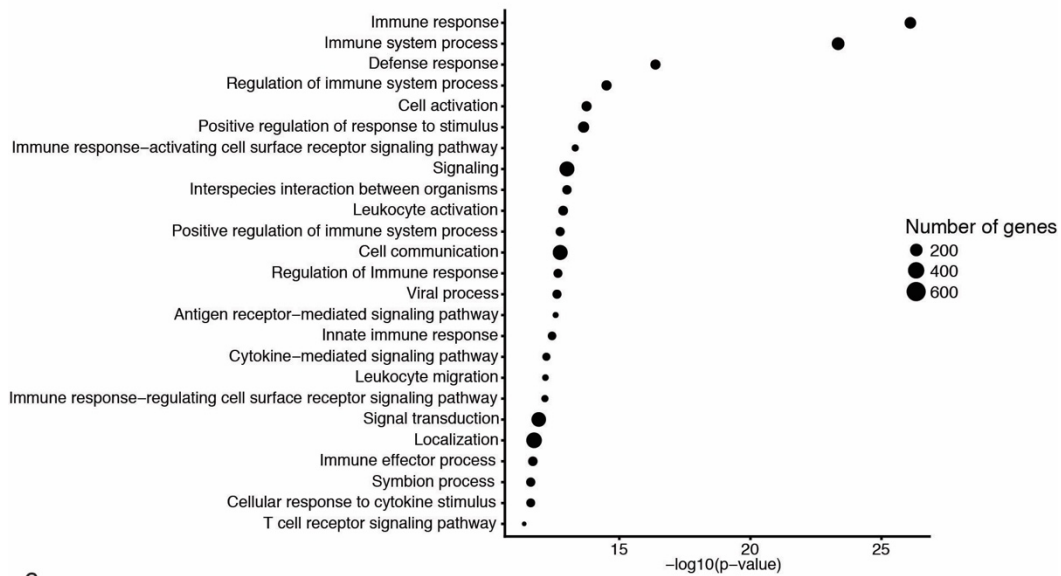

c

Secreted molecules that are upregulated in elite controllers via IPA analysis

| Symbol  | Gene Name                                                 | Expr p-value | Type(s)   |
|---------|-----------------------------------------------------------|--------------|-----------|
| IL32    | interleukin 32                                            | 7.02E-09     | cytokine  |
| CCL5    | C-C motif chemokine ligand 5                              | 2.04E-04     | cytokine  |
| DDHD1   | DDHD domain containing 1                                  | 2.94E-03     | enzyme    |
| IL1B    | interleukin 1 beta                                        | 1.87E-04     | cytokine  |
| CXCL3   | C-X-C motif chemokine ligand 3                            | 1.17E-03     | cytokine  |
| CXCL2   | C-X-C motif chemokine ligand 2                            | 2.54E-03     | cytokine  |
| CCL2    | C-C motif chemokine ligand 2                              | 2.68E-03     | cytokine  |
| RNASE1  | ribonuclease A family member 1, pancreatic                | 9.19E-03     | enzyme    |
| LTB     | lymphotoxin beta                                          | 5.40E-05     | cytokine  |
| TNF     | tumor necrosis factor                                     | 1.18E-09     | cytokine  |
| ADAMTS4 | ADAM metalloproteinase with thrombospondin type 1 motif 4 | 1.32E-02     | peptidase |

**Supplementary Figure 5.** Differential expression analysis of the scRNAseq data. **a**, Venn diagram showing the overlap of differentially expressed genes detected by each of the three algorithms. A total of 2,264 genes achieved significance ( $p < 0.05$ ) in at least two of the three algorithms. These genes are listed in **Supplementary Table 2**. **b**, The top 25 GO terms enriched among the 2,264 differentially expressed genes. **c**, List of secreted molecules that were upregulated in ECs, as determined by IPA. Expression p-values were derived from the scDD algorithm. Expr Log Ratio represents log fold-change values obtained from the ROTS algorithm; positive values indicate higher expression levels in ECs relative to CPs.

**Supplementary Table 1.** Clinical characteristics of donors included in this study. Values represent median and interquartile range.

|                        | EC                                     | ART                                                           | CP                              | Acute                           |
|------------------------|----------------------------------------|---------------------------------------------------------------|---------------------------------|---------------------------------|
| Number                 | 12                                     | 14                                                            | 18                              | 7                               |
| Site                   | San Francisco (USA)                    | San Francisco (USA), Philadelphia (USA), Mexico City (Mexico) | Mexico City (Mexico)            | Mexico City (Mexico)            |
| Age                    | 52 (47-59)                             | 40 (32-58)                                                    | 31 (24-37)                      | 23 (20-27)                      |
| Gender                 | 10 Males / 1 Female / 1 Male to Female | 8 Males / 1 Female / 5 No Info                                | 10 Males / 1 Female / 7 No Info | 7 Males / 0 Female              |
| Viral Load (copies/mL) | <40                                    | <40                                                           | 51,396 (12,845-213,173)         | 1,996,027 (1,297,461-4,421,034) |
| CD4 Count              | 881 (660-1172)                         | 544 (359-601)                                                 | 348 (175-521)                   | 306 (238-370)                   |

**Supplementary Table 2.** Complete list of 2,264 genes that were differentially expressed between HIV-specific CD8<sup>+</sup> T cells from the LNs of ECs and HIV-specific CD8<sup>+</sup> T cells from the LNs of CPs. Expression p-values were derived from all three algorithms. Log fold-change values were obtained from the ROTS algorithm; positive values indicate higher expression levels in ECs relative to CPs.

|    | Gene     | ROTS_p_value | scDD_p_value | Seurat_p_value | ROTS_logFC_ECvsCP |
|----|----------|--------------|--------------|----------------|-------------------|
| 1  | FGR      | 0.000251057  | 1.28E-10     | 2.11E-13       | -0.603750882      |
| 2  | ANKIB1   | 0.046888612  | 0.04714008   | 0.016589303    | -0.34821919       |
| 3  | BAD      | 0.007892305  | 0.004137142  | 0.004390725    | -0.447335927      |
| 4  | LASP1    | 0.000327     | 0.000284261  | 6.98E-05       | -0.593199005      |
| 5  | CFLAR    | 0.035104507  | 0.041408655  | 0.005148014    | 0.384553531       |
| 6  | ARF5     | 4.77E-06     | 0.000300004  | 0.00062709     | -0.75691189       |
| 7  | CD38     | 0.000923995  | 0.003101072  | 2.91E-07       | -0.547019936      |
| 8  | RBM6     | 0.014807746  | 0.000750173  | 0.029111376    | -0.415661586      |
| 9  | ITGAL    | 5.68E-06     | 6.22E-11     | 8.72E-14       | -0.749717502      |
| 10 | LAMP2    | 0.005818162  | 0.037847531  | 0.003711308    | -0.463014331      |
| 11 | VPS41    | 0.007360015  | 0.005975192  | 0.001128704    | -0.451009209      |
| 12 | PSMB1    | 0.002769491  | 9.38E-05     | 0.003084592    | -0.49731471       |
| 13 | METTL13  | 0.013500947  | 0.022199973  | 0.019799688    | -0.419804079      |
| 14 | NCAPD2   | 0.002933527  | 0.007938609  | 0.005565498    | -0.494572658      |
| 15 | BTK      | 0.013500947  | 0.026657218  | 0.019799688    | -0.419804079      |
| 16 | AGPS     | 0.039112146  | 0.268369495  | 0.01462382     | -0.360202179      |
| 17 | CD74     | 1.89E-07     | 3.94E-09     | 1.02E-09       | -0.855310132      |
| 18 | BTN3A1   | 3.31E-06     | 1.52E-13     | 2.24E-06       | -0.768990933      |
| 19 | BAK1     | 0.016647592  | 0.064552513  | 0.001866069    | -0.409489623      |
| 20 | RANBP3   | 0.010573638  | 0.535071442  | 0.005565498    | -0.431328506      |
| 21 | PNPLA6   | 0.03828382   | 0.006889102  | 0.001272974    | -0.361294456      |
| 22 | LRRC7    | 0.023400827  | 0.003602816  | 0.025385927    | -0.391323168      |
| 23 | SLC4A7   | 0.036514141  | 0.013173645  | 0.008691033    | -0.364354579      |
| 24 | LCP2     | 5.46E-05     | 0.009842038  | 0.000151181    | -0.66651015       |
| 25 | USP28    | 0.002766429  | 0.050617417  | 0.0023975      | -0.497369996      |
| 26 | R3HDM1   | 0.04832539   | 0.113764942  | 0.029912708    | -0.346145951      |
| 27 | TNFRSF9  | 0.010366075  | 1.07E-05     | 7.54E-08       | -0.432482473      |
| 28 | JKAMP    | 0.000772773  | 0.058839928  | 0.000486213    | -0.555380938      |
| 29 | THOC3    | 0.027548419  | 0.539311568  | 0.035341621    | -0.381281389      |
| 30 | TRAPPC3  | 0.000134051  | 0.000857572  | 8.39E-05       | -0.630425674      |
| 31 | PUM2     | 0.012990468  | 0.001342027  | 0.010906521    | -0.419971541      |
| 32 | PRDM1    | 0.001687046  | 6.65E-05     | 0.000116294    | -0.52075714       |
| 33 | PPP1R12A | 0.034334922  | 7.93E-07     | 9.62E-05       | -0.368269933      |
| 34 | POLD1    | 0.027225175  | 0.001187324  | 0.005148014    | -0.381997928      |
| 35 | INTS13   | 0.048753456  | 0.000170775  | 0.001315844    | -0.345590609      |
| 36 | LPAR2    | 0.049260306  | 0.229664858  | 0.037824004    | -0.344933769      |
| 37 | CHI3L2   | 1.58E-07     | 3.40E-19     | 5.23E-17       | -0.913046177      |
| 38 | KLF6     | 0            | 2.54E-06     | 0.017795065    | 1.266155811       |
| 39 | PKM      | 0.017160501  | 0.007156632  | 0.035832649    | -0.407836632      |
| 40 | DHX8     | 0.001776245  | 0.005639808  | 0.018366707    | -0.518486903      |
| 41 | KCNAB2   | 0.003225806  | 0.00175451   | 0.001083067    | -0.489975514      |
| 42 | RORA     | 0.02001676   | 2.21E-06     | 0.01227609     | 0.420789268       |



|    |         |             |             |             |              |
|----|---------|-------------|-------------|-------------|--------------|
| 43 | ACAP1   | 0.000811944 | 0.000636427 | 1.32E-06    | -0.553058745 |
| 44 | NDE1    | 0.023074585 | 0.55098849  | 0.007558016 | -0.392165028 |
| 45 | SMARCE1 | 0.005132283 | 0.00212063  | 0.049678491 | -0.469273808 |
| 46 | EED     | 0.004263588 | 0.000406968 | 0.034541315 | -0.478453809 |
| 47 | ICAM3   | 0.001881731 | 0.158730052 | 0.005342133 | -0.515838157 |
| 48 | ARHGEF1 | 0.022795499 | 0.130403488 | 0.014584083 | -0.392871632 |
| 49 | GTF3C1  | 0.036212771 | 0.001157118 | 0.000117344 | -0.364892975 |
| 50 | CST7    | 1.44E-05    | 3.45E-05    | 3.23E-05    | -0.717640805 |
| 51 | ARAF    | 0.001394041 | 0.032557023 | 0.000284575 | -0.529430801 |
| 52 | PPP2R5C | 0.00074304  | 3.07E-07    | 9.32E-05    | 0.599604528  |
| 53 | ITM2A   | 0.000109715 | 6.00E-12    | 4.15E-08    | -0.639053167 |
| 54 | SENP1   | 0.047725933 | 0.002912815 | 0.003909206 | -0.347016565 |
| 55 | MEF2C   | 0.047283726 | 4.08E-05    | 0.000318701 | -0.347662099 |
| 56 | PTPRC   | 1.58E-07    | 6.98E-13    | 0.003966539 | 1.002984548  |
| 57 | FYB1    | 3.16E-08    | 5.16E-08    | 7.42E-09    | -0.971881252 |
| 58 | BZW1    | 0           | 1.69E-11    | 2.10E-05    | 1.291785002  |
| 59 | TRAF5   | 0.000152042 | 0.003103598 | 0.003577576 | -0.624436918 |
| 60 | P2RX5   | 0.002211161 | 9.41E-05    | 6.78E-10    | -0.50840055  |
| 61 | ITGAE   | 6.31E-08    | 5.91E-05    | 3.67E-12    | -0.959715493 |
| 62 | OXCT1   | 0.016205322 | 0.052865422 | 0.000318701 | -0.410981499 |
| 63 | RPS5    | 0.038063411 | 0.002550067 | 0.000772432 | -0.361634208 |
| 64 | PIGS    | 0.001872136 | 3.19E-07    | 2.10E-06    | -0.516109519 |
| 65 | SH3BP2  | 0.028016539 | 0.000177576 | 0.006823684 | -0.38024288  |
| 66 | GNAS    | 8.09E-05    | 0.00124832  | 0.001074882 | -0.651571081 |
| 67 | SIRPG   | 0.001352187 | 9.73E-05    | 1.04E-12    | -0.530824631 |
| 68 | OAS1    | 0.017055552 | 0.077384815 | 0.000163095 | -0.40817688  |
| 69 | LAG3    | 4.48E-06    | 7.79E-05    | 3.46E-07    | -0.759245175 |
| 70 | ZNF268  | 0.049226027 | 0.093497352 | 0.004498867 | -0.344973644 |
| 71 | CDV3    | 3.74E-05    | 1.40E-06    | 0.01185117  | 0.746675487  |
| 72 | RNF31   | 0.045982293 | 0.06232384  | 0.023030104 | -0.349602155 |
| 73 | HNRNPC  | 6.00E-07    | 0.000120674 | 0.003541077 | -0.829826957 |
| 74 | PHGDH   | 0.018034941 | 0.00997002  | 0.001847353 | -0.405062177 |
| 75 | EZR     | 0           | 2.77E-09    | 0.011531512 | 1.150929467  |
| 76 | MYL6    | 1.58E-07    | 8.61E-08    | 0.025012385 | 1.033445191  |
| 77 | COMT    | 0.046903131 | 0.048739104 | 0.017105872 | -0.348199269 |
| 78 | ADA2    | 0.027445837 | 0.114578591 | 0.00011758  | -0.381524831 |
| 79 | CBX5    | 0.013982261 | 0.002308931 | 2.05E-05    | -0.418191997 |
| 80 | DHPS    | 0.015512499 | 0.324689476 | 0.004200076 | -0.413341396 |
| 81 | PSMD8   | 0.04242027  | 2.08E-08    | 0.020453999 | -0.355049388 |
| 82 | NDUFB7  | 0.000564769 | 0.036025811 | 0.049327442 | -0.569417353 |
| 83 | MKMK2   | 0.018413389 | 0.248673007 | 0.02163724  | -0.403982555 |
| 84 | PES1    | 0.033575784 | 0.025199006 | 0.004498867 | -0.369653989 |
| 85 | LGALS1  | 1.58E-07    | 6.30E-13    | 3.72E-07    | 1.044560573  |

|     |          |             |             |             |              |
|-----|----------|-------------|-------------|-------------|--------------|
| 86  | TSPO     | 0.002484534 | 0.004166675 | 0.00568219  | -0.502741683 |
| 87  | RPL3     | 0           | 1.95E-15    | 0.000132025 | 1.487635259  |
| 88  | APOL1    | 0.001077552 | 0.006059465 | 0.000279642 | -0.541256208 |
| 89  | MYH9     | 0.004622372 | 0.000234753 | 2.03E-05    | -0.474294975 |
| 90  | GRAP2    | 0.033371062 | 0.069058657 | 0.023666461 | 0.388111318  |
| 91  | IL2RB    | 0.001270248 | 0.054375269 | 2.91E-05    | -0.533817775 |
| 92  | GZMH     | 0.001920586 | 0.016706695 | 6.37E-09    | -0.514834654 |
| 93  | GZMB     | 0.009170286 | 0.014987311 | 6.06E-06    | -0.4391884   |
| 94  | NIN      | 0.001788839 | 2.30E-05    | 9.23E-06    | -0.518178085 |
| 95  | ASB2     | 0.046582791 | 0.018508604 | 6.86E-06    | -0.348695025 |
| 96  | SRSF5    | 3.16E-08    | 1.81E-08    | 0.044710245 | 1.114223557  |
| 97  | DCAF11   | 0.001171706 | 1.80E-08    | 1.44E-11    | -0.537638813 |
| 98  | SEC23A   | 0.000940566 | 0.000288955 | 0.003823436 | -0.54620109  |
| 99  | IFT52    | 0.030856228 | 0.007826656 | 0.031827118 | -0.374793973 |
| 100 | SLA2     | 0.015759706 | 6.36E-05    | 0.003127023 | -0.412526036 |
| 101 | ADNP     | 0.001318604 | 2.54E-07    | 0.03094358  | 0.570480472  |
| 102 | HM13     | 0.000393946 | 0.000128415 | 0.006113988 | -0.585254992 |
| 103 | PPP1R16B | 0.016944511 | 5.12E-05    | 3.72E-07    | -0.408547557 |
| 104 | ELF4     | 0.016245187 | 0.010021168 | 0.000318701 | -0.410841282 |
| 105 | PIM2     | 0.001671107 | 0.009511992 | 0.022756271 | -0.52115605  |
| 106 | NDFIP2   | 0.012715012 | 0.000247674 | 7.91E-05    | -0.42120958  |
| 107 | ACP5     | 0.005215201 | 0.298763873 | 0.000971926 | -0.46838401  |
| 108 | MAPK3    | 0.020629506 | 0.000872067 | 0.007250457 | -0.397942711 |
| 109 | SETD6    | 0.035952086 | 0.018918798 | 0.019799688 | -0.365368024 |
| 110 | NPRL3    | 0.004158607 | 0.148458362 | 0.026890677 | -0.479657263 |
| 111 | MPG      | 0.002237548 | 0.064485402 | 7.62E-06    | -0.507812184 |
| 112 | COTL1    | 8.81E-06    | 0.000101286 | 0.00110858  | -0.734490086 |
| 113 | GGA2     | 5.65E-05    | 1.15E-05    | 0.000315201 | -0.665292353 |
| 114 | PYCARD   | 5.14E-06    | 0.00032436  | 0.007501187 | -0.753032818 |
| 115 | TRIP4    | 0.042943059 | 0.237063684 | 0.003151349 | -0.35425316  |
| 116 | RIPK2    | 0.017152452 | 0.00947356  | 3.40E-05    | -0.407862321 |
| 117 | GSDMD    | 0.048734802 | 0.15108767  | 0.000164891 | -0.345619507 |
| 118 | KLHDC4   | 0.001004009 | 0.003673823 | 1.31E-06    | -0.543261993 |
| 119 | MAP4K1   | 0.00016552  | 6.45E-07    | 3.49E-08    | -0.620818745 |
| 120 | OAZ1     | 3.19E-06    | 1.79E-05    | 0.000647874 | -0.770841945 |
| 121 | ZNF419   | 0.031010069 | 0.142479107 | 0.014460369 | -0.37446166  |
| 122 | RPS16    | 4.05E-05    | 3.90E-10    | 0.020570137 | 0.742714546  |
| 123 | DYRK1B   | 0.012372357 | 0.003059904 | 0.001315844 | -0.42276644  |
| 124 | NKG7     | 0.008288176 | 1.94E-10    | 1.86E-06    | -0.44471291  |
| 125 | TYK2     | 0.017187835 | 0.041162654 | 0.016151007 | -0.407750348 |
| 126 | JAK3     | 9.22E-06    | 3.71E-08    | 2.96E-06    | -0.733359805 |
| 127 | RPL18A   | 1.86E-06    | 1.02E-12    | 0.000114212 | 0.878639272  |
| 128 | ELL      | 0.031206553 | 0.167303296 | 0.04469002  | -0.374044278 |

|     |          |             |             |             |              |
|-----|----------|-------------|-------------|-------------|--------------|
| 129 | ANKMY2   | 0.009750331 | 0.030513278 | 0.000137652 | -0.435783667 |
| 130 | DOCK8    | 0.045226627 | 0.099689166 | 0.017874046 | -0.350763146 |
| 131 | GATA3    | 0.037568178 | 0.010036266 | 0.005796604 | -0.362502364 |
| 132 | ATE1     | 0.034491288 | 0.092239765 | 0.012521955 | -0.367970176 |
| 133 | SPOCK2   | 0.004583959 | 1.19E-13    | 0.004323954 | 0.50500931   |
| 134 | MINPP1   | 0.007387476 | 0.000137796 | 0.000578725 | -0.450828478 |
| 135 | GBF1     | 0.002345906 | 0.001992957 | 0.001754899 | -0.505564712 |
| 136 | TSPAN14  | 0.00540149  | 0.311415058 | 0.019427211 | -0.466678266 |
| 137 | RAD51C   | 0.001581213 | 0.003712562 | 0.023666461 | -0.523714327 |
| 138 | MTMR4    | 0.007342466 | 0.00048816  | 0.000427764 | -0.451129505 |
| 139 | CDK5RAP3 | 0.036042074 | 0.001174124 | 0.011206897 | -0.365215982 |
| 140 | BLMH     | 0.005704911 | 0.052227945 | 0.000513823 | -0.463942233 |
| 141 | FTSJ3    | 0.015462502 | 0.009987646 | 0.000355034 | -0.413479195 |
| 142 | SYNGR2   | 9.43E-05    | 5.08E-08    | 8.98E-08    | -0.644992466 |
| 143 | DDX5     | 0           | 4.26E-08    | 0.019799688 | 1.209404433  |
| 144 | LGALS3BP | 0.009299192 | 0.200264163 | 0.008702838 | -0.438396975 |
| 145 | RAB5C    | 0.010694022 | 0.013446583 | 0.002411546 | -0.430781231 |
| 146 | ABI3     | 0.022576353 | 1.78E-05    | 2.78E-06    | -0.393414576 |
| 147 | NEIL3    | 0.028497254 | 0.017194555 | 0.000318701 | -0.379273208 |
| 148 | CTSC     | 0.000240452 | 0.000149375 | 8.04E-08    | -0.605583751 |
| 149 | CRTAM    | 0.021716779 | 2.01E-06    | 0.001505714 | -0.395649983 |
| 150 | DNAJC4   | 0.000843002 | 0.035253996 | 0.01255225  | -0.55132669  |
| 151 | CPT1A    | 0.019442144 | 0.01401319  | 0.000306899 | -0.401206688 |
| 152 | EIF4G2   | 1.58E-07    | 7.31E-08    | 1.47E-06    | -0.914653248 |
| 153 | PDHX     | 0.005937914 | 0.099961774 | 0.019799688 | -0.461971307 |
| 154 | TCIRG1   | 0.001472098 | 3.67E-05    | 0.000139676 | -0.526884961 |
| 155 | ELK3     | 0.006335427 | 6.06E-07    | 0.028283832 | 0.486876811  |
| 156 | MAN1A1   | 0.002548861 | 0.028200489 | 0.000117344 | -0.501474019 |
| 157 | SRSF3    | 1.02E-05    | 2.02E-07    | 0.008720379 | 0.804872939  |
| 158 | MED23    | 0.003156777 | 0.09688448  | 0.000544711 | -0.490904595 |
| 159 | VNN2     | 0.000979736 | 5.25E-05    | 0.003335986 | -0.544426782 |
| 160 | GMDS     | 0.00435023  | 0.093280214 | 0.018172961 | -0.477422708 |
| 161 | DAP      | 0.006961335 | 3.49E-07    | 0.040790026 | 0.481734684  |
| 162 | SUB1     | 0.000285904 | 6.60E-05    | 4.13E-05    | -0.59848673  |
| 163 | SKP1     | 9.47E-08    | 1.97E-06    | 0.005955375 | 1.070036446  |
| 164 | SMC4     | 0.000136008 | 7.97E-06    | 2.42E-07    | -0.629719747 |
| 165 | CBLB     | 0.011554826 | 0.000860344 | 0.000206971 | -0.426635022 |
| 166 | NCBP2    | 0.026273152 | 0.002970516 | 0.000318701 | -0.384220924 |
| 167 | ABCC5    | 0.027442112 | 0.027732811 | 0.000841818 | -0.381529293 |
| 168 | DNAH1    | 0.011558203 | 0.005699196 | 0.015689292 | -0.426617883 |
| 169 | NCL      | 0.011560508 | 0.004914652 | 0.003191995 | -0.426601784 |
| 170 | ZAP70    | 0.012809229 | 0.002339819 | 1.63E-05    | -0.420765241 |
| 171 | ACTR3    | 0.009422385 | 0.000937079 | 0.004200076 | -0.437724693 |

|     |         |             |             |             |              |
|-----|---------|-------------|-------------|-------------|--------------|
| 172 | OTOF    | 0.025327662 | 0.015585234 | 0.025081888 | -0.386538918 |
| 173 | PPM1G   | 0.000101856 | 5.28E-06    | 0.000132025 | -0.642277249 |
| 174 | PPP1R7  | 0.028763778 | 0.000981624 | 0.019799688 | -0.378645938 |
| 175 | PLEK    | 0.000285746 | 4.04E-07    | 4.40E-06    | -0.598518464 |
| 176 | SCP2    | 2.24E-06    | 0.000145628 | 4.98E-05    | -0.782753412 |
| 177 | STXBP3  | 0.023439303 | 0.000121801 | 0.00681695  | -0.391231807 |
| 178 | PARK7   | 0.020282558 | 0.005355677 | 0.001534374 | -0.398873139 |
| 179 | DOCK7   | 0.047421122 | 2.96E-06    | 0.040622788 | 0.363338636  |
| 180 | MIIP    | 0.000573954 | 0.000942685 | 1.31E-06    | -0.568679117 |
| 181 | RGS2    | 0.039991573 | 3.30E-10    | 8.49E-05    | 0.375759474  |
| 182 | TROVE2  | 5.37E-07    | 0.000384095 | 1.57E-05    | -0.831088062 |
| 183 | ATP6VOB | 0.024199198 | 0.000120038 | 0.002862431 | -0.389283622 |
| 184 | FASLG   | 0.004121836 | 0.021543443 | 5.73E-05    | -0.480142238 |
| 185 | TNFSF4  | 0.003873556 | 0.000257053 | 0.001315844 | -0.482427375 |
| 186 | RCOR3   | 0.0488686   | 0.05860754  | 0.006402791 | -0.345434703 |
| 187 | KMT2A   | 0.002120005 | 0.010782536 | 0.011136925 | -0.510496301 |
| 188 | FBXO30  | 0.008627707 | 0.000128402 | 0.000318701 | -0.442581807 |
| 189 | SET     | 6.31E-08    | 2.53E-11    | 1.14E-05    | 1.101990988  |
| 190 | FLVCR2  | 0.021954864 | 0.021052512 | 0.000486213 | -0.395034913 |
| 191 | YPEL5   | 3.41E-05    | 8.58E-06    | 0.049661001 | 0.751109661  |
| 192 | PANK3   | 0.002777003 | 0.135652554 | 0.002330854 | -0.497172701 |
| 193 | MTRF1   | 0.003802632 | 0.014536373 | 0.000114212 | -0.483347997 |
| 194 | PAIP2   | 0.009942428 | 2.35E-07    | 0.026685804 | 0.459935457  |
| 195 | EGR1    | 0.015653336 | 2.23E-08    | 0.000338597 | 0.435521252  |
| 196 | PTK2B   | 0.002124014 | 0.000751532 | 4.38E-05    | -0.510410061 |
| 197 | TRIM25  | 0.042068777 | 0.071236908 | 0.019799688 | -0.355570573 |
| 198 | ZSCAN18 | 0.00497355  | 0.005907566 | 0.019799688 | -0.470793716 |
| 199 | NAA50   | 0.028617953 | 0.007565438 | 0.030833803 | -0.378993778 |
| 200 | DESI2   | 0.008687614 | 0.021423935 | 0.024726388 | -0.442202006 |
| 201 | CXCR4   | 5.05E-07    | 0.000119799 | 0.021898768 | 0.934048136  |
| 202 | UBL3    | 0.008966574 | 0.009830732 | 1.07E-06    | -0.440463718 |
| 203 | SASH3   | 3.43E-05    | 0.008713208 | 3.50E-07    | -0.685120363 |
| 204 | CD244   | 0.000338489 | 0.000635424 | 7.62E-06    | -0.591912343 |
| 205 | SPATA1  | 0.002676693 | 0.058477532 | 0.025854276 | -0.499006053 |
| 206 | CCDC18  | 0.004225901 | 0.024681327 | 0.008057004 | -0.478844779 |
| 207 | WIPF3   | 0.016501483 | 0.00144112  | 0.001315844 | -0.409960101 |
| 208 | RBM19   | 0.034258475 | 6.72E-05    | 0.016683224 | 0.386333999  |
| 209 | PKN1    | 0.004056089 | 0.002446221 | 0.003377357 | -0.480896505 |
| 210 | GIPC1   | 0.000360205 | 0.00188976  | 0.00112862  | -0.589223382 |
| 211 | CENPK   | 0.007781232 | 0.000248959 | 3.82E-06    | -0.448109551 |
| 212 | OPTN    | 0.040865791 | 0.000820508 | 0.008116771 | -0.357456319 |
| 213 | PDE1B   | 0.020088631 | 0.011421389 | 2.91E-05    | -0.399418946 |
| 214 | B9D2    | 0.024069945 | 0.032623911 | 0.000306899 | -0.389604342 |

|     |           |             |             |             |              |
|-----|-----------|-------------|-------------|-------------|--------------|
| 215 | MXD4      | 0.037492993 | 0.092616414 | 0.000358261 | -0.362646039 |
| 216 | CKS2      | 0.016013667 | 0.073798598 | 0.001922014 | -0.411597292 |
| 217 | SLC12A4   | 0.022523831 | 0.028263562 | 0.000318701 | -0.393559245 |
| 218 | ZNF831    | 0.000181081 | 4.32E-06    | 1.48E-08    | -0.61747856  |
| 219 | MBOAT7    | 0.019149075 | 0.001571339 | 0.000486213 | -0.402154064 |
| 220 | CHCHD5    | 1.07E-06    | 7.31E-05    | 0.000132025 | -0.809253182 |
| 221 | PSD4      | 2.64E-05    | 3.39E-06    | 1.58E-10    | -0.695118224 |
| 222 | SYMPK     | 0.012258443 | 9.73E-05    | 0.000123352 | -0.423291317 |
| 223 | SNRPB     | 0.037133041 | 0.020371305 | 0.043359082 | 0.380670773  |
| 224 | MGME1     | 0.001946373 | 0.001452084 | 0.00176861  | -0.514483663 |
| 225 | HCST      | 0.024467142 | 0.131760928 | 0.001128704 | -0.388610142 |
| 226 | CCR7      | 0.005570987 | 1.97E-11    | 0.001310033 | 0.494189632  |
| 227 | IFI6      | 0.004383877 | 2.07E-06    | 3.82E-06    | -0.47702242  |
| 228 | PZP       | 1.58E-07    | 2.44E-07    | 2.85E-08    | -0.88085921  |
| 229 | FAM78A    | 0.020683574 | 0.046261036 | 0.000484326 | -0.397819488 |
| 230 | MAP2K2    | 0.000884698 | 4.93E-05    | 5.08E-05    | -0.549096305 |
| 231 | HELB      | 0.000865444 | 0.032771344 | 0.015689292 | -0.550197109 |
| 232 | POR       | 0.001123098 | 0.011759687 | 0.005148014 | -0.539390469 |
| 233 | STYXL1    | 0.048802285 | 0.01376973  | 0.013407511 | -0.345520672 |
| 234 | TPST2     | 0.001999242 | 0.015297311 | 0.023779154 | -0.513212016 |
| 235 | MPST      | 0.033965217 | 0.349065064 | 0.037937331 | -0.368928175 |
| 236 | CHN1      | 0.007473518 | 0.000330184 | 0.000127592 | -0.450221334 |
| 237 | ORMDL1    | 0.032274036 | 0.004704795 | 0.022745194 | -0.371943368 |
| 238 | TWSG1     | 0.000874724 | 0.04987227  | 0.019799688 | -0.549668036 |
| 239 | LDLR      | 0.008785683 | 0.000880799 | 6.42E-06    | -0.441572789 |
| 240 | BST2      | 0.027407676 | 0.000457264 | 0.001315844 | -0.38160215  |
| 241 | DDA1      | 0.014030869 | 0.04396991  | 0.047144218 | -0.41799731  |
| 242 | MRPL34    | 0.002092829 | 0.044138594 | 0.048148169 | -0.51113728  |
| 243 | LSP1      | 4.29E-05    | 3.02E-07    | 3.55E-05    | -0.676198695 |
| 244 | CAP1      | 0.033524241 | 0.153245698 | 0.019799688 | -0.369748557 |
| 245 | RAB11FIP4 | 0.016659176 | 0.001154919 | 3.64E-05    | -0.409452224 |
| 246 | MRPS25    | 0.033457421 | 1.60E-05    | 0.026890677 | -0.369885877 |
| 247 | NDUFA2    | 0.000418376 | 0.009581442 | 0.000360249 | -0.582747993 |
| 248 | TRIM22    | 0.041976201 | 0.137773315 | 0.022271027 | 0.37237654   |
| 249 | PER2      | 0.002511174 | 1.19E-11    | 3.08E-05    | 0.536253106  |
| 250 | RPA1      | 0.017397102 | 0.044543704 | 0.019855749 | -0.407020335 |
| 251 | PNISR     | 0.007346127 | 0.012481437 | 0.002704712 | -0.451102092 |
| 252 | UTP3      | 0.029642668 | 0.000411197 | 7.16E-06    | -0.377130756 |
| 253 | H3F3B     | 0           | 5.05E-15    | 1.47E-06    | 1.2452537    |
| 254 | ZRANB2    | 0.002188719 | 0.000526481 | 0.038067994 | -0.508840927 |
| 255 | EIF5A     | 1.58E-07    | 1.05E-05    | 0.007373216 | 1.047512821  |
| 256 | XAF1      | 0.003265009 | 0.00697328  | 2.91E-05    | -0.48938104  |
| 257 | ERAL1     | 0.003311817 | 0.012197265 | 0.021723815 | -0.48862646  |

|     |          |             |             |             |              |
|-----|----------|-------------|-------------|-------------|--------------|
| 258 | PCED1A   | 0.021966448 | 0.000910779 | 0.025928333 | -0.394996651 |
| 259 | DCAF8    | 0.002407392 | 0.007190662 | 0.011305081 | -0.504311333 |
| 260 | PATJ     | 0.031236885 | 1.29E-06    | 0.019799688 | 0.392477474  |
| 261 | FBXO44   | 0.004150937 | 0.010552175 | 4.21E-06    | -0.479756993 |
| 262 | SLF1     | 0.043431033 | 0.022415055 | 0.047968773 | -0.353489303 |
| 263 | RARRES3  | 8.36E-05    | 6.42E-06    | 2.10E-06    | -0.650137795 |
| 264 | SARAF    | 0           | 1.90E-09    | 0.001137613 | 1.320001645  |
| 265 | RNF122   | 0.001972918 | 0.010765006 | 0.00035216  | -0.513825012 |
| 266 | CCNB1    | 0.021076195 | 0.0002457   | 0.000122413 | -0.396774765 |
| 267 | GSTM1    | 0.027020074 | 0.081947524 | 0.005397664 | -0.382436511 |
| 268 | RPS15A   | 0.01107973  | 0.031479771 | 0.012561087 | -0.428959454 |
| 269 | ANXA1    | 0           | 2.77E-09    | 0.002255112 | 1.231733579  |
| 270 | SRPK2    | 0.005818477 | 0.057998291 | 0.003934285 | -0.463011439 |
| 271 | KHDC1    | 0.0297723   | 0.016446989 | 0.025081888 | -0.376889201 |
| 272 | PRR5L    | 0.025937251 | 0.000473529 | 0.001186875 | -0.385075208 |
| 273 | ATP5G2   | 0.024817215 | 0.002327519 | 0.001178989 | -0.387718072 |
| 274 | BLOC1S1  | 0.047872041 | 0.104869231 | 0.009321962 | -0.346811399 |
| 275 | ABCB10   | 0.00907146  | 0.013733709 | 0.025708977 | -0.439826439 |
| 276 | CEP350   | 0.000124866 | 0.000277482 | 0.047613733 | -0.633252045 |
| 277 | COX5B    | 0.002869074 | 0.00513688  | 0.005148014 | -0.495576269 |
| 278 | PLXNC1   | 0.049733824 | 0.021389594 | 0.028159506 | -0.344352562 |
| 279 | BORA     | 0.025166656 | 0.013670168 | 0.007130496 | -0.386927655 |
| 280 | SUCLA2   | 0.012007323 | 0.000401654 | 3.32E-05    | -0.424403743 |
| 281 | PHF11    | 0.001846979 | 0.029987763 | 0.028762033 | -0.516707927 |
| 282 | ITM2B    | 0.000737327 | 7.13E-06    | 0.01521175  | -0.557572157 |
| 283 | LCP1     | 1.75E-05    | 0.004085265 | 0.00365617  | -0.710657269 |
| 284 | KDEL2    | 0.003434379 | 0.000731802 | 2.19E-06    | -0.48685415  |
| 285 | CCM2     | 0.000669023 | 9.93E-05    | 0.000151181 | -0.56192068  |
| 286 | CALCOCO2 | 0.032594344 | 0.00013068  | 0.000236208 | -0.371334256 |
| 287 | RTP4     | 0.016122625 | 0.044702825 | 0.025081888 | -0.411287681 |
| 288 | SIT1     | 0.004455274 | 0.001789002 | 3.00E-05    | -0.476215613 |
| 289 | RPS6     | 0           | 1.31E-10    | 0.001333023 | 1.286223502  |
| 290 | FOXP4    | 0.043126034 | 0.00989913  | 0.006823684 | -0.353964735 |
| 291 | TMEM14B  | 0.018418787 | 0.029575038 | 0.026791003 | 0.425628102  |
| 292 | FGFBP2   | 0.000713749 | 0.000153347 | 0.006594871 | -0.558991998 |
| 293 | NUMA1    | 0.002488953 | 0.004779103 | 0.009960579 | -0.502656635 |
| 294 | SORL1    | 0.005821886 | 7.40E-11    | 0.043811433 | 0.491718708  |
| 295 | NUSAP1   | 0.00983104  | 0.005688809 | 2.70E-05    | -0.435348954 |
| 296 | PPM1B    | 0.031352061 | 0.011556494 | 0.009144387 | -0.373785348 |
| 297 | STAMBPL1 | 0.017376207 | 0.00244994  | 3.86E-05    | -0.407103105 |
| 298 | SSB      | 4.64E-05    | 0.000205381 | 0.005313983 | -0.672840296 |
| 299 | PARP9    | 1.07E-06    | 8.58E-07    | 4.24E-07    | -0.808149906 |
| 300 | RGS3     | 0.041379237 | 0.024271898 | 0.000152185 | -0.356678194 |

|     |          |             |             |             |              |
|-----|----------|-------------|-------------|-------------|--------------|
| 301 | CLSTN3   | 0.000322391 | 0.003209134 | 0.034670074 | -0.593817925 |
| 302 | KLRG1    | 0.000184995 | 1.78E-06    | 1.58E-05    | -0.616609051 |
| 303 | VAMP1    | 0.003811533 | 0.030575162 | 7.42E-06    | -0.483211651 |
| 304 | LPAR6    | 1.58E-07    | 2.23E-05    | 2.10E-05    | -0.859155789 |
| 305 | SLC38A6  | 0.027580582 | 0.002138828 | 0.007463156 | -0.381226494 |
| 306 | SLC27A2  | 0.045224134 | 0.003855173 | 0.000396669 | -0.350767837 |
| 307 | PSTPIP1  | 0.010405877 | 0.015696175 | 0.003151349 | -0.432261248 |
| 308 | PIF1     | 0.024226722 | 0.000495269 | 1.79E-05    | -0.389198813 |
| 309 | NLRC5    | 0.000125466 | 0.037284042 | 0.002714164 | -0.633090334 |
| 310 | MBTPS1   | 7.88E-05    | 0.000424159 | 2.79E-06    | -0.652518382 |
| 311 | NDUFB10  | 0.00023073  | 0.001112636 | 0.001353614 | -0.607417127 |
| 312 | TCF25    | 0.006176157 | 0.000584833 | 0.005148014 | -0.460014012 |
| 313 | TOB1     | 0.031104507 | 5.77E-07    | 0.044023588 | 0.392751345  |
| 314 | SKAP1    | 0.005571839 | 3.75E-05    | 3.34E-05    | -0.465156566 |
| 315 | CLTC     | 0.037404331 | 0.005443574 | 0.001926936 | -0.362809722 |
| 316 | ARRB2    | 5.37E-07    | 6.18E-05    | 0.000427764 | -0.830567331 |
| 317 | TBCD     | 0.036462124 | 0.028327474 | 0.007091323 | -0.364470887 |
| 318 | SIRT3    | 0.036383151 | 0.067630997 | 0.001042024 | -0.364623792 |
| 319 | IFITM3   | 0           | 1.02E-06    | 1.99E-05    | -0.991570369 |
| 320 | CAPN10   | 0.025076573 | 0.00179277  | 0.019799688 | -0.38713399  |
| 321 | MYO1F    | 0.016489331 | 5.94E-05    | 3.17E-05    | -0.410004123 |
| 322 | RPL13A   | 9.47E-08    | 5.79E-12    | 0.000367521 | 1.081636073  |
| 323 | SH3BGRL3 | 0           | 1.57E-09    | 0.021403411 | 1.269418729  |
| 324 | CD53     | 9.77E-05    | 0.001011476 | 0.007245393 | -0.643934853 |
| 325 | MGST3    | 0.002198567 | 0.000700372 | 0.000996238 | -0.508635661 |
| 326 | TPM3     | 0.001049965 | 5.11E-05    | 0.000487779 | -0.542498462 |
| 327 | TTC13    | 0.049630389 | 0.014064441 | 0.001880977 | -0.344461959 |
| 328 | LYST     | 0           | 1.67E-15    | 4.02E-08    | -1.067290753 |
| 329 | ARF1     | 0.009847169 | 0.00012664  | 0.005015992 | -0.43526225  |
| 330 | GALM     | 6.31E-07    | 1.92E-09    | 1.53E-08    | -0.824067132 |
| 331 | RPS27A   | 9.47E-08    | 1.93E-10    | 0.01723886  | 1.083047738  |
| 332 | RETREG2  | 0.002237674 | 1.06E-08    | 0.010432844 | 0.542662268  |
| 333 | POMGNT2  | 0.022978474 | 4.65E-06    | 0.019799688 | -0.392404429 |
| 334 | RPL32    | 1.58E-07    | 4.49E-12    | 0.017795065 | 0.975585893  |
| 335 | LIMD1    | 0.001932264 | 0.035180954 | 0.001315844 | -0.514809611 |
| 336 | ATG3     | 0.034668676 | 0.004092463 | 0.009874361 | -0.367643406 |
| 337 | SSBP2    | 0.003900669 | 1.27E-05    | 0.018655894 | 0.513474509  |
| 338 | GTF2H2   | 0.00163525  | 0.000439958 | 0.047735559 | -0.522118694 |
| 339 | FEM1C    | 0.033191876 | 0.010843419 | 0.045659956 | -0.370323423 |
| 340 | PSPH     | 0.025842087 | 0.001763344 | 0.000135777 | -0.385299714 |
| 341 | ATXN7L1  | 0.000245344 | 0.001543131 | 0.002997607 | -0.604737013 |
| 342 | GIGYF1   | 0.000118143 | 4.56E-05    | 2.58E-05    | -0.635554586 |
| 343 | MSN      | 3.79E-07    | 4.56E-05    | 5.41E-05    | -0.8408313   |

|     |          |             |             |             |              |
|-----|----------|-------------|-------------|-------------|--------------|
| 344 | KRBOX4   | 0.020565495 | 0.341371193 | 0.017618923 | -0.398121607 |
| 345 | IL2RG    | 4.37E-05    | 0.001634378 | 0.024474704 | -0.675448206 |
| 346 | MCPH1    | 0.007351177 | 0.004018066 | 0.002982253 | -0.451074204 |
| 347 | RPL10    | 0           | 7.08E-11    | 0.000353919 | 1.285320539  |
| 348 | DOK2     | 0.000323401 | 0.030250661 | 1.64E-07    | -0.593639205 |
| 349 | GOLGA7   | 0.007194464 | 0.000519951 | 0.00047953  | -0.45221893  |
| 350 | CDKN2B   | 0.033291838 | 0.002649783 | 0.019799688 | -0.370202471 |
| 351 | LRSAM1   | 0.027755792 | 0.000364665 | 0.026397601 | -0.380843322 |
| 352 | MTG1     | 0.014973928 | 0.042028648 | 0.032211799 | -0.415135008 |
| 353 | RPS3     | 0           | 6.24E-14    | 0.008206123 | 1.256002376  |
| 354 | LAMTOR1  | 0.026304779 | 0.045872101 | 0.0015579   | -0.38414305  |
| 355 | DSN1     | 0.007248659 | 0.013886134 | 0.000481874 | -0.451809948 |
| 356 | TRPT1    | 0.000142194 | 0.000105072 | 1.68E-06    | -0.62764856  |
| 357 | SAP18    | 0.039339751 | 0.002782816 | 0.01928303  | -0.359821564 |
| 358 | CCDC102B | 0.013500947 | 0.003534361 | 0.019799688 | -0.419804079 |
| 359 | THRB     | 0.022871283 | 0.005362655 | 0.013527975 | 0.413098314  |
| 360 | SCLT1    | 0.015120605 | 0.008884985 | 6.06E-06    | -0.414643081 |
| 361 | FAM160B1 | 0.018237012 | 0.007440408 | 0.009182196 | -0.404439338 |
| 362 | GEMIN6   | 0.019199798 | 0.008946701 | 0.025385927 | -0.402004728 |
| 363 | SETBP1   | 0.019676757 | 0.000162703 | 0.025081888 | -0.400528722 |
| 364 | HAUS1    | 9.47E-07    | 1.44E-05    | 0.030716169 | -0.812859702 |
| 365 | PDK1     | 0.02499637  | 0.039485398 | 0.000914791 | -0.387302333 |
| 366 | MBNL1    | 0.000893473 | 0.00010753  | 0.000996534 | -0.548631624 |
| 367 | JAKMIP1  | 0.002125592 | 0.028840836 | 0.000939047 | -0.510363462 |
| 368 | BANK1    | 0.041049081 | 0.025852907 | 0.024347719 | -0.357185633 |
| 369 | NR4A2    | 0.021148823 | 0.00492557  | 0.045385838 | 0.417398055  |
| 370 | ASAP1    | 0.008489742 | 1.20E-06    | 0.00051998  | -0.44343371  |
| 371 | CD8A     | 1.58E-07    | 6.23E-06    | 4.69E-06    | -0.922012005 |
| 372 | TRIP12   | 0.015051985 | 0.065379962 | 0.049208412 | -0.414843536 |
| 373 | CERS3    | 0.018540054 | 0.01455445  | 0.019799688 | -0.403928487 |
| 374 | GBP5     | 0.039366328 | 0.042752869 | 0.002299258 | -0.359772286 |
| 375 | C21orf91 | 0.016716243 | 0.098614052 | 0.016659421 | -0.409268502 |
| 376 | MOV10    | 0.000851461 | 0.000764057 | 4.39E-06    | -0.550881988 |
| 377 | TTN      | 0.001477053 | 6.52E-08    | 0.000361339 | -0.526697876 |
| 378 | EEF1A1   | 0           | 0           | 1.37E-06    | 1.708376739  |
| 379 | PHKG2    | 0.029680639 | 8.29E-06    | 7.82E-05    | -0.377071096 |
| 380 | RBPMS    | 0.047702733 | 0.006328829 | 0.007957503 | -0.347046787 |
| 381 | ZFH2-AS1 | 0.002427372 | 0.134826185 | 0.025081888 | -0.503935876 |
| 382 | MX1      | 0.000309576 | 0.000373795 | 1.01E-05    | -0.595502973 |
| 383 | TNFRSF14 | 0.004282211 | 0.01661022  | 0.006177603 | -0.478239822 |
| 384 | AUTS2    | 0.034620226 | 4.90E-09    | 0.000281409 | 0.385561666  |
| 385 | MITD1    | 0.019992046 | 0.186629265 | 0.007831109 | -0.39968184  |
| 386 | FAM160B2 | 0.016516508 | 0.004373322 | 0.000225379 | -0.409913755 |



|     |            |             |             |             |              |
|-----|------------|-------------|-------------|-------------|--------------|
| 387 | MRPL10     | 0.000430244 | 1.50E-07    | 0.00030209  | -0.581428363 |
| 388 | GART       | 0.031557099 | 0.020936383 | 0.004505628 | -0.373334061 |
| 389 | CYB5R1     | 0.01767764  | 0.007683475 | 0.033422686 | -0.406121001 |
| 390 | ADGRG5     | 0.036218768 | 0.239354996 | 0.001948152 | -0.364881773 |
| 391 | CTBP1      | 6.88E-06    | 2.99E-08    | 3.44E-05    | -0.743924099 |
| 392 | CCDC107    | 0.035586295 | 0.043899565 | 0.015432559 | -0.365918988 |
| 393 | U2AF1      | 0.024796951 | 0.077709722 | 0.006483824 | -0.387772553 |
| 394 | RALGDS     | 0.045236822 | 0.0003747   | 0.011305081 | -0.350749536 |
| 395 | ST6GALNAC6 | 0.006602487 | 6.04E-05    | 0.002299932 | -0.457032601 |
| 396 | DEDD2      | 0.009139764 | 0.00028899  | 0.002982253 | -0.439385049 |
| 397 | CD3G       | 6.31E-07    | 4.32E-06    | 3.79E-06    | -0.824036754 |
| 398 | FCRL3      | 2.30E-05    | 1.92E-17    | 5.23E-17    | -0.700298301 |
| 399 | LY6E       | 1.41E-05    | 8.31E-05    | 2.88E-06    | -0.718041818 |
| 400 | USP41      | 0.034644057 | 0.11431254  | 0.026791003 | -0.367688645 |
| 401 | YDJC       | 0.000917209 | 0.001984126 | 0.004273138 | -0.547368979 |
| 402 | LSM12      | 0.005128085 | 0.00083867  | 0.000289318 | -0.469299094 |
| 403 | NXF1       | 0.026783536 | 3.31E-05    | 0.007957503 | -0.383000082 |
| 404 | DHRS3      | 0.017618616 | 0.00020075  | 0.012255157 | 0.428225348  |
| 405 | CAMK2N1    | 0.04304501  | 1.74E-05    | 0.04809834  | 0.370595813  |
| 406 | SLAMF6     | 0.000350483 | 1.51E-06    | 0.000338597 | -0.590391139 |
| 407 | FLVCR1     | 0.012507765 | 0.009189744 | 0.000318701 | -0.422172226 |
| 408 | FCMR       | 0.000609021 | 0.002514616 | 0.001578589 | -0.566110281 |
| 409 | H3F3A      | 0.002142794 | 0.002055389 | 0.009870549 | -0.509952291 |
| 410 | SMARCAD1   | 0.028082002 | 0.025809169 | 0.003284924 | -0.38011189  |
| 411 | RNF149     | 0.002056531 | 0.009894675 | 0.010211774 | -0.511875086 |
| 412 | ARHGAP25   | 0.017648475 | 0.021501712 | 0.025081888 | 0.428111889  |
| 413 | CGGBP1     | 0.010008775 | 0.011205071 | 7.91E-05    | -0.434396127 |
| 414 | TMEM79     | 0.015719273 | 0.005284885 | 0.025708977 | -0.412661933 |
| 415 | EOMES      | 0.00040714  | 0.000326619 | 3.55E-05    | -0.583897445 |
| 416 | MNDA       | 0.01041178  | 7.95E-07    | 3.82E-06    | -0.432231787 |
| 417 | IFI16      | 0.008351114 | 0.002476669 | 0.002127488 | -0.444301628 |
| 418 | YEATS2     | 0.003451802 | 0.04064962  | 0.005839953 | -0.486604543 |
| 419 | GNL3       | 0.003103844 | 2.85E-08    | 0.005276135 | 0.524312869  |
| 420 | H2AFZ      | 0.028025724 | 0.021671683 | 0.008237    | -0.380226755 |
| 421 | SHISA5     | 0.028952086 | 0.018491618 | 0.024494487 | 0.397501626  |
| 422 | RAD54L2    | 0.003050817 | 0.000146923 | 0.000188516 | -0.492637453 |
| 423 | PPM1M      | 0.005382362 | 4.22E-07    | 7.79E-06    | -0.466837585 |
| 424 | C4orf3     | 0.000814879 | 0.001857601 | 0.001555679 | -0.552889953 |
| 425 | ANXA5      | 0.02168389  | 0.002272817 | 0.003868016 | -0.395731358 |
| 426 | TMEM155    | 0.000541064 | 3.89E-05    | 3.82E-06    | -0.571359905 |
| 427 | PDSS2      | 0.00335124  | 0.207146731 | 0.011305081 | -0.488050207 |
| 428 | RELL2      | 0.012380279 | 0.000880102 | 0.001315844 | -0.422723358 |
| 429 | YWHAZ      | 3.16E-08    | 2.72E-07    | 0.033021971 | 1.105903871  |

|     |            |             |             |             |              |
|-----|------------|-------------|-------------|-------------|--------------|
| 430 | UBAP1      | 0.0159019   | 0.027297876 | 4.49E-05    | -0.412005302 |
| 431 | MELK       | 0.013500947 | 0.004444979 | 0.019799688 | -0.419804079 |
| 432 | METTLL3    | 0.016597311 | 0.031942874 | 0.049264973 | -0.409616322 |
| 433 | IFI27      | 0.02134518  | 0.065551251 | 0.001890213 | -0.396019572 |
| 434 | TMX3       | 0.001779717 | 0.017688737 | 0.024726388 | -0.518381077 |
| 435 | WEE1       | 0.005380405 | 0.005613416 | 0.00215646  | -0.466857601 |
| 436 | PRKCB      | 0.011624708 | 0.052585039 | 0.010404931 | -0.426291455 |
| 437 | B2M        | 0           | 0           | 5.95E-11    | 2.548448559  |
| 438 | VPS39      | 0.043663689 | 0.009042309 | 0.002053374 | -0.353123144 |
| 439 | PIP4K2C    | 0.036560602 | 0.011695208 | 0.012335496 | -0.36427467  |
| 440 | TSC22D4    | 0.014075627 | 0.015851836 | 0.000318701 | -0.417831971 |
| 441 | RNF214     | 0.049177482 | 0.010566204 | 0.019799688 | -0.345043294 |
| 442 | SGK494     | 0.049581497 | 0.001335282 | 0.005148014 | -0.344515593 |
| 443 | RAB4B      | 0.001699325 | 7.56E-05    | 0.005148014 | -0.520463363 |
| 444 | OTUB1      | 4.57E-05    | 0.000287332 | 0.000185997 | -0.673368015 |
| 445 | ZNF558     | 0.014756644 | 0.002540705 | 0.001905029 | -0.415890541 |
| 446 | ATP5H      | 3.76E-06    | 1.66E-05    | 0.004444059 | -0.764772804 |
| 447 | SRP68      | 0.010237895 | 0.008296443 | 0.017584998 | -0.433155167 |
| 448 | AC090152.1 | 0.019635566 | 0.003082891 | 0.000505584 | -0.400633352 |
| 449 | FTH1       | 3.16E-08    | 3.91E-11    | 0.000482596 | 1.123006142  |
| 450 | COPS6      | 0.00014352  | 9.30E-05    | 2.79E-06    | -0.627229206 |
| 451 | PAFAH1B2   | 0.002678587 | 0.000125123 | 0.01968715  | -0.498968635 |
| 452 | TAP1       | 0.004611893 | 0.00057519  | 0.00054841  | -0.474406936 |
| 453 | REEP4      | 0.006568651 | 0.039378212 | 0.007130496 | -0.457276723 |
| 454 | SLC16A4    | 0.042277097 | 0.004908808 | 0.019799688 | -0.355267622 |
| 455 | IL7R       | 0.002049934 | 2.50E-12    | 7.58E-05    | 0.547507659  |
| 456 | HNRNPH1    | 0.002095669 | 0           | 5.86E-14    | 0.546405041  |
| 457 | CD2BP2     | 0.020695284 | 0.105006428 | 0.010958    | -0.397798312 |
| 458 | SLC50A1    | 0.001779244 | 0.00257979  | 0.000773931 | -0.518400851 |
| 459 | CXCL10     | 0.001032984 | 0.002133124 | 0.001315844 | -0.543015516 |
| 460 | MRPL1      | 0.034156209 | 0.203262572 | 0.000487779 | -0.368623644 |
| 461 | GPR183     | 0.04504684  | 4.56E-11    | 0.0162637   | 0.367258253  |
| 462 | CNBP       | 1.96E-06    | 1.19E-08    | 0.004706882 | 0.874863997  |
| 463 | TRAPPC1    | 8.86E-05    | 8.69E-06    | 2.74E-06    | -0.647567116 |
| 464 | PYM1       | 0.010514298 | 0.008311665 | 0.024675596 | -0.431647032 |
| 465 | PDGFD      | 0.003106306 | 7.19E-06    | 0.007043456 | -0.491690468 |
| 466 | S1PR1      | 9.09E-05    | 6.25E-12    | 0.034268458 | 0.704486207  |
| 467 | C9orf16    | 0.00096386  | 0.008976978 | 0.01776566  | -0.545230752 |
| 468 | NAT1       | 0.029191244 | 0.080673951 | 0.02163724  | -0.378117369 |
| 469 | ZIK1       | 0.044922827 | 5.51E-05    | 7.09E-08    | -0.35121242  |
| 470 | ATF7IP     | 1.58E-07    | 2.94E-09    | 0.0021503   | -0.915003739 |
| 471 | FRMD5      | 0.049038855 | 0.00247227  | 0.005148014 | -0.345207372 |
| 472 | CD8B       | 1.58E-07    | 4.87E-05    | 1.34E-05    | -0.864023233 |

|     |            |             |             |             |              |
|-----|------------|-------------|-------------|-------------|--------------|
| 473 | CXCR6      | 0.001645666 | 7.71E-12    | 6.24E-12    | -0.521830045 |
| 474 | TP53RK     | 0.02271154  | 0.016824564 | 4.98E-07    | -0.393084281 |
| 475 | ZNF24      | 0.04567016  | 1.97E-05    | 0.023819225 | 0.366200598  |
| 476 | CTSW       | 2.02E-05    | 1.61E-06    | 5.21E-07    | -0.704498891 |
| 477 | WASHC2C    | 0.021297361 | 0.102433104 | 0.038836459 | -0.39615999  |
| 478 | CFL1       | 0           | 9.49E-06    | 4.27E-07    | -1.106863545 |
| 479 | NAA16      | 0.011164857 | 0.001119843 | 0.000315201 | -0.428550035 |
| 480 | FAM192A    | 0.002110725 | 0.000106983 | 0.00028474  | -0.510715766 |
| 481 | CES2       | 0.000875765 | 0.000876627 | 7.62E-06    | -0.549621268 |
| 482 | GRK2       | 0.009616407 | 0.108865984 | 0.000567246 | -0.436579622 |
| 483 | VANGL1     | 0.048901553 | 0.273938545 | 0.007325557 | -0.345382796 |
| 484 | ZNF417     | 0.026321665 | 0.010719157 | 0.024347719 | -0.384090041 |
| 485 | TNFRSF10D  | 0.027145414 | 0.001691603 | 0.007376547 | -0.382177869 |
| 486 | UQCRH      | 0.002253646 | 0.016371243 | 0.023893944 | -0.507437644 |
| 487 | SPDYE2B    | 0.000278328 | 3.44E-05    | 5.16E-05    | -0.599551968 |
| 488 | RNF213     | 1.23E-06    | 2.17E-07    | 2.66E-05    | -0.806253688 |
| 489 | ANKRD36C   | 1.23E-06    | 2.01E-06    | 0.003831597 | -0.805130602 |
| 490 | ZNF266     | 0.015019001 | 1.39E-06    | 0.000982988 | -0.414972748 |
| 491 | RPL15      | 0           | 7.30E-11    | 0.000389054 | 1.351560608  |
| 492 | DCTN2      | 0.003160091 | 0.038278808 | 1.45E-06    | -0.490858971 |
| 493 | TBC1D10C   | 2.79E-05    | 6.66E-07    | 1.97E-09    | -0.69335828  |
| 494 | UCP2       | 3.76E-06    | 5.41E-06    | 3.40E-07    | -0.764347145 |
| 495 | RNPEP      | 0.010050092 | 0.007550887 | 0.015689292 | -0.434135003 |
| 496 | AC008969.1 | 0.005265324 | 0.002547392 | 0.019799688 | -0.467904371 |
| 497 | DEAF1      | 0.001204469 | 0.002934456 | 0.023030104 | -0.53627974  |
| 498 | TMEM80     | 0.003421375 | 9.19E-05    | 0.002011366 | -0.48704893  |
| 499 | MAN1B1     | 0.032070482 | 0.023536302 | 0.007356941 | -0.372348372 |
| 500 | SAMD9L     | 0.001213844 | 0.000974463 | 0.012243384 | -0.535947611 |
| 501 | HASPIN     | 0.000192759 | 4.68E-05    | 4.94E-11    | -0.614985897 |
| 502 | AP3S1      | 0.002649233 | 5.77E-06    | 0.000929995 | -0.499533077 |
| 503 | GRB2       | 0.011845938 | 0.00039755  | 0.001315334 | -0.425183399 |
| 504 | DMAP1      | 0.000842434 | 0.051417965 | 0.001268353 | -0.55136887  |
| 505 | GRAMD1C    | 0.001380626 | 0.019137707 | 0.038822591 | -0.529875699 |
| 506 | ZNF518B    | 0.024147024 | 0.001376754 | 0.024966998 | -0.389421281 |
| 507 | SLC25A20   | 0.000406414 | 0.020614711 | 0.001560155 | -0.58398973  |
| 508 | LINC00324  | 0.005635534 | 0.00018627  | 0.000127131 | -0.464578416 |
| 509 | C12orf42   | 0.034719273 | 0.000499627 | 0.001315844 | -0.367546708 |
| 510 | DNHD1      | 0.038327852 | 0.020125213 | 0.024970193 | -0.361216695 |
| 511 | ZADH2      | 0.03697658  | 0.0010992   | 0.000564254 | -0.363517644 |
| 512 | TRNAU1AP   | 0.000450098 | 7.11E-05    | 0.000481874 | -0.579504156 |
| 513 | MCFD2      | 0.025167035 | 0.00105335  | 0.006715682 | -0.386926471 |
| 514 | ARHGAP45   | 0.005304968 | 0.005478241 | 0.018247725 | -0.467511776 |
| 515 | PRF1       | 3.95E-06    | 4.39E-09    | 6.06E-14    | -0.763383311 |

|     |            |             |             |             |              |
|-----|------------|-------------|-------------|-------------|--------------|
| 516 | S1PR5      | 0.010374313 | 0.034829392 | 0.000484326 | -0.432427185 |
| 517 | F2R        | 0.016398081 | 5.57E-06    | 0.001816549 | -0.410315993 |
| 518 | HLA-V      | 0.027694432 | 0.02878921  | 9.87E-05    | -0.380976139 |
| 519 | DHTKD1     | 0.04924768  | 0.001032797 | 0.000127131 | -0.344943481 |
| 520 | TIGIT      | 3.76E-06    | 3.24E-11    | 3.25E-07    | -0.764517303 |
| 521 | C5orf24    | 0.003737738 | 0.001898847 | 0.031077349 | -0.484236558 |
| 522 | IDH2       | 0.000524146 | 3.67E-05    | 0.000116439 | -0.57273964  |
| 523 | AL365277.1 | 0.018097784 | 0.005942967 | 0.024347719 | -0.404892668 |
| 524 | TSEN54     | 0.008179944 | 0.01919726  | 0.017731173 | -0.445455185 |
| 525 | UBA7       | 0.000838205 | 1.96E-08    | 0.000128017 | -0.55156499  |
| 526 | MRPS16     | 0.017666183 | 0.010597082 | 0.003335986 | -0.406155197 |
| 527 | CLN8       | 0.04813626  | 0.048862963 | 0.038761742 | -0.346406302 |
| 528 | RBM10      | 0.029139417 | 0.003771765 | 4.32E-05    | -0.378244792 |
| 529 | DAZAP2     | 1.58E-07    | 5.24E-08    | 0.002997607 | 1.048023186  |
| 530 | TMEM50A    | 6.41E-06    | 0.000601127 | 8.15E-05    | -0.746299132 |
| 531 | ST6GALNAC3 | 0.036824474 | 0.240148046 | 0.020067989 | -0.363787491 |
| 532 | PTP4A2     | 0.00553431  | 0.007611623 | 0.04767824  | -0.465460525 |
| 533 | VPS33B     | 0.00472003  | 0.040927673 | 0.042797133 | -0.473243327 |
| 534 | UQCR10     | 0.000137681 | 6.47E-06    | 0.000786427 | -0.629137875 |
| 535 | IRAK1      | 0.001164541 | 0.001580771 | 0.004768182 | -0.537944649 |
| 536 | NELL2      | 0.004308251 | 4.04E-08    | 0.001008665 | 0.508621453  |
| 537 | HIST2H2BE  | 0.009175557 | 0.004406551 | 0.001315844 | -0.439157046 |
| 538 | PTRHD1     | 0.048915473 | 0.122844547 | 0.000116294 | -0.34536149  |
| 539 | USP18      | 0.000190897 | 0.002858473 | 2.27E-05    | -0.61542723  |
| 540 | ANO9       | 0.029478505 | 0.00113082  | 0.002053374 | -0.377500974 |
| 541 | IFITM2     | 4.77E-06    | 5.24E-06    | 0.000227312 | -0.756695934 |
| 542 | PRMT3      | 0.036621299 | 0.00048697  | 0.00208965  | -0.364156728 |
| 543 | C16orf52   | 0.038537561 | 0.001963927 | 0.005148014 | -0.360868312 |
| 544 | TRIM69     | 0.003168329 | 0.020234182 | 0.000727766 | -0.490733716 |
| 545 | KATNA1     | 0.043206048 | 0.546945563 | 0.000772432 | -0.353833657 |
| 546 | CMC1       | 0           | 1.23E-14    | 8.72E-14    | -1.268689176 |
| 547 | ZNF546     | 0.017781832 | 0.015508893 | 0.026890677 | -0.40580809  |
| 548 | MT1X       | 0.002829398 | 0.025690939 | 0.001487846 | -0.496290451 |
| 549 | ISG15      | 5.59E-06    | 1.83E-06    | 4.90E-11    | -0.750274572 |
| 550 | RINL       | 0.005067988 | 0.018800139 | 0.000130048 | -0.469891077 |
| 551 | ACTBP11    | 0.001558361 | 0.0026414   | 1.38E-05    | -0.524346943 |
| 552 | ADAT2      | 0.02239341  | 3.19E-06    | 0.010970977 | -0.393879756 |
| 553 | ARID2      | 0.026003819 | 0.018413051 | 0.007926098 | -0.384905945 |
| 554 | TSPYL1     | 1.36E-06    | 3.55E-07    | 0.030948324 | 0.890383727  |
| 555 | RRP7A      | 0.022438104 | 0.000136313 | 0.026990306 | 0.414308456  |
| 556 | SLC35E2B   | 0.018653589 | 0.003323877 | 0.019799688 | -0.403569506 |
| 557 | HLA-DRB9   | 0.000652831 | 0.007541811 | 0.008241027 | -0.56295985  |
| 558 | AC146944.1 | 0.011828799 | 0.001022479 | 0.002239195 | -0.425260645 |

|     |            |             |             |             |              |
|-----|------------|-------------|-------------|-------------|--------------|
| 559 | EVL        | 0.003357774 | 0.093920247 | 0.000227312 | -0.487959727 |
| 560 | MYO18A     | 0.017618711 | 0.000284997 | 0.007325557 | -0.406305003 |
| 561 | HDAC2      | 0.008071934 | 0.011749874 | 0.020469602 | -0.446184358 |
| 562 | AC004057.1 | 0.010138564 | 0.001408744 | 0.009843397 | -0.433651185 |
| 563 | NPIP8      | 0.000429266 | 0.000899769 | 0.023030104 | -0.581527165 |
| 564 | FLNA       | 0.038836216 | 0.054929185 | 0.000239431 | -0.360694263 |
| 565 | ABCB8      | 0.011815258 | 2.70E-06    | 7.91E-05    | -0.425328464 |
| 566 | ENTPD4     | 0.008067136 | 0.000700663 | 0.015275167 | -0.446215464 |
| 567 | HTT        | 0.005872862 | 0.304386868 | 0.030526126 | -0.462496903 |
| 568 | GSTK1      | 0.040813585 | 0.002091621 | 0.015897266 | 0.374381629  |
| 569 | RPS26      | 0.003086358 | 0.00086711  | 0.000837347 | -0.492023806 |
| 570 | HIST1H2BK  | 0.003208731 | 0.015782825 | 0.019799688 | -0.490108467 |
| 571 | S100A6     | 1.54E-05    | 3.28E-10    | 0.011754414 | 0.787602983  |
| 572 | IRAK4      | 0.006903289 | 0.007514961 | 0.001575884 | -0.454599176 |
| 573 | TFDP1      | 0.017536077 | 0.000702713 | 0.025708977 | -0.406566681 |
| 574 | AC131392.1 | 0.036656619 | 0.000216349 | 0.000318701 | -0.364106655 |
| 575 | UBL5       | 0.005741083 | 0.024592764 | 0.018969577 | -0.463639849 |
| 576 | HELZ       | 0.035382457 | 0.00115857  | 0.006452465 | -0.366292004 |
| 577 | ITSN2      | 0.003808503 | 0.015678533 | 0.001669704 | -0.483260353 |
| 578 | ANKRD35    | 0.018545515 | 0.000460433 | 0.005148014 | -0.403911555 |
| 579 | HLA-DRB5   | 0           | 1.85E-07    | 5.07E-08    | -1.188475658 |
| 580 | KCNRG      | 0.013685089 | 0.000495491 | 0.019799688 | -0.419382237 |
| 581 | MDM4       | 7.14E-05    | 0.000246203 | 0.002184913 | -0.656151645 |
| 582 | NCOA6      | 0.046441134 | 0.073947401 | 0.001715956 | -0.348893921 |
| 583 | CALM1      | 0           | 1.45E-12    | 1.05E-05    | 1.201916961  |
| 584 | CNOT7      | 0.003212203 | 0.000119693 | 0.010101792 | -0.490063734 |
| 585 | GK         | 0.023194874 | 0.003733622 | 0.025385927 | -0.391841216 |
| 586 | TOX        | 0.002910328 | 0.001469685 | 3.72E-07    | -0.494914762 |
| 587 | CD3E       | 0.021372167 | 0.134809518 | 0.00112862  | -0.395961281 |
| 588 | MTND4LP30  | 0           | 1.90E-22    | 1.43E-08    | 1.870694755  |
| 589 | DZIP3      | 0.016936052 | 0.000454129 | 2.03E-06    | -0.408574214 |
| 590 | CCDC167    | 0.001778644 | 0.009475215 | 0.014144664 | -0.518426524 |
| 591 | ARMCX6     | 0.000808661 | 0.002403443 | 0.014460369 | -0.553243256 |
| 592 | PJA2       | 0.019660533 | 0.000542868 | 0.001836607 | -0.400553471 |
| 593 | ZNF525     | 0.04762717  | 0.162099604 | 0.005148014 | -0.347164695 |
| 594 | TMEM244    | 0.013669655 | 0.000739516 | 0.019799688 | -0.419437901 |
| 595 | SYS1       | 0.010291364 | 0.004651349 | 0.04469002  | -0.432880197 |
| 596 | PSMB8-AS1  | 0.0049453   | 0.019795289 | 0.007757054 | -0.470833872 |
| 597 | HLA-DRA    | 3.35E-06    | 0.000653576 | 7.98E-08    | -0.7687374   |
| 598 | C6orf47    | 0.015489616 | 0.00069654  | 0.026402336 | -0.413419026 |
| 599 | HLA-E      | 9.47E-07    | 0.00526612  | 0.0060046   | -0.81206379  |
| 600 | SPDYE2     | 0.023733255 | 0.001013266 | 0.001171956 | -0.390498494 |
| 601 | ADGRG1     | 0.030208636 | 0.001977091 | 0.001968785 | -0.376042735 |

|     |            |             |             |             |              |
|-----|------------|-------------|-------------|-------------|--------------|
| 602 | PRR13      | 0.044740768 | 0.012051233 | 0.047697019 | -0.35149121  |
| 603 | NAP1L4     | 0.03190493  | 0.002262611 | 0.01629774  | -0.372670042 |
| 604 | TMSB4X     | 0           | 0           | 1.61E-07    | 1.565961645  |
| 605 | DENND1C    | 0.000126791 | 0.022229504 | 2.00E-07    | -0.632682524 |
| 606 | RNU6-32P   | 0.004159239 | 0.000811052 | 0.007346174 | -0.479651013 |
| 607 | MT-TM      | 0.001582066 | 0.000574547 | 0.001826087 | -0.52369452  |
| 608 | MT-TA      | 0.000561644 | 0.135388139 | 0.014696598 | -0.56968092  |
| 609 | MT-TN      | 0.000786977 | 0.021761536 | 0.003335986 | -0.554577593 |
| 610 | STK38L     | 0.01586254  | 0.080262104 | 0.000318701 | -0.412145886 |
| 611 | IGKC       | 0.001092008 | 0.000804986 | 2.10E-06    | -0.540596605 |
| 612 | IGLV2-23   | 0.000183006 | 0.010168553 | 0.000181333 | -0.617065639 |
| 613 | IGLC3      | 0.002344612 | 3.18E-06    | 1.32E-06    | -0.505588336 |
| 614 | TRBV6-1    | 0.017653747 | 0.001300577 | 0.005148014 | -0.406189246 |
| 615 | TRBV6-5    | 0.017570608 | 7.31E-05    | 2.43E-10    | -0.406468389 |
| 616 | TRBV6-6    | 0.036001547 | 0.001300577 | 0.005148014 | -0.365279601 |
| 617 | TRBV5-1    | 2.78E-06    | 1.31E-21    | 7.37E-13    | 0.860246258  |
| 618 | AC245427.1 | 0           | 3.31E-16    | 2.88E-06    | 1.163906444  |
| 619 | TRBV28     | 0           | 1.32E-15    | 1.14E-27    | -1.224857547 |
| 620 | TRAV12-2   | 9.47E-07    | 8.01E-11    | 3.08E-05    | -0.812369394 |
| 621 | TRAV26-1   | 3.22E-06    | 1.41E-21    | 2.67E-06    | 0.854448513  |
| 622 | TRAV29DV5  | 0.002511963 | 5.13E-10    | 0.007302794 | 0.536242562  |
| 623 | TRAV36DV7  | 0.027126002 | 0.097478965 | 0.001911715 | -0.382212638 |
| 624 | TRAV39     | 0           | 1.14E-13    | 9.40E-25    | -1.106907426 |
| 625 | TRAJ59     | 0.010123982 | 0.001031694 | 0.005148014 | -0.433722262 |
| 626 | TRAJ49     | 0.003430844 | 1.79E-05    | 9.57E-14    | -0.486908678 |
| 627 | TRAJ7      | 0.001986333 | 4.09E-05    | 0.005148014 | -0.513537229 |
| 628 | IGHG4      | 0.043958525 | 0.00135889  | 0.001315844 | -0.352683692 |
| 629 | IGHG3      | 0.016177356 | 0.000446275 | 1.79E-05    | -0.411084002 |
| 630 | RPS26P6    | 0.002670665 | 0.094527487 | 0.012257187 | -0.499092658 |
| 631 | AL365357.1 | 0           | 0           | 1.74E-18    | -1.743099442 |
| 632 | TCTEX1D2   | 0.039710814 | 0.064104388 | 2.91E-05    | -0.359154606 |
| 633 | CFL1P2     | 9.55E-05    | 0.000439774 | 0.000318701 | -0.644716065 |
| 634 | PPP1CB     | 1.26E-07    | 4.47E-16    | 2.17E-06    | 1.055405521  |
| 635 | IRF9       | 0.000737927 | 0.008774963 | 0.000255865 | -0.557554262 |
| 636 | ITGA1      | 0.005575847 | 1.06E-06    | 0.017483406 | 0.494131964  |
| 637 | ATP5HP3    | 0.003645161 | 0.000741162 | 0.005148014 | -0.485096951 |
| 638 | AP1G2      | 0.001504261 | 0.057341806 | 0.036765321 | -0.52587139  |
| 639 | KANSL1-AS1 | 0.001488858 | 0.010693677 | 0.005148014 | -0.526359833 |
| 640 | HNRNPUL2   | 0.044756486 | 0.017320851 | 0.025708977 | -0.351466735 |
| 641 | LINC01347  | 0.024517676 | 0.033607279 | 0.026890677 | -0.388495537 |
| 642 | LINC00612  | 0.008294331 | 6.18E-06    | 9.23E-06    | -0.44466837  |
| 643 | AC141586.1 | 0.029503882 | 0.021856337 | 0.023729587 | -0.377439842 |
| 644 | AC138409.2 | 0.007665709 | 0.022414951 | 0.000199883 | -0.448944569 |

|     |            |             |             |             |              |
|-----|------------|-------------|-------------|-------------|--------------|
| 645 | GUSBP9     | 0.001958778 | 0.000167009 | 0.005148014 | -0.51419166  |
| 646 | RBMXP1     | 0.013500947 | 0.005906587 | 0.019799688 | -0.419804079 |
| 647 | RPS27AP11  | 0.001066157 | 0.000442125 | 0.025442946 | 0.581679748  |
| 648 | GAPDHP63   | 0.021446563 | 0.181241539 | 0.000820616 | -0.395831793 |
| 649 | AL355001.1 | 0.008327378 | 0.00638453  | 0.025081888 | -0.444465264 |
| 650 | DAZAP2P1   | 1.01E-06    | 1.40E-14    | 0.005148014 | 0.904939389  |
| 651 | AL591846.1 | 0           | 0           | 2.77E-08    | -1.133912549 |
| 652 | IGHV4-59   | 0.001032984 | 0.001338477 | 0.001315844 | -0.543015516 |
| 653 | HLA-DPB2   | 0           | 1.20E-11    | 4.39E-13    | -1.186647927 |
| 654 | AC012485.1 | 0.006455337 | 0.001193761 | 0.019799688 | -0.458199112 |
| 655 | EIF3LP3    | 0.006799918 | 0.017642076 | 0.001911715 | -0.455426886 |
| 656 | AP4B1-AS1  | 0.001345717 | 6.97E-05    | 0.005148014 | -0.531050612 |
| 657 | ITGB2-AS1  | 5.59E-06    | 5.43E-05    | 5.04E-06    | -0.750251752 |
| 658 | PARP1P1    | 0.018540054 | 0.002965245 | 0.019799688 | -0.403928487 |
| 659 | CFL1P3     | 0.001159554 | 0.002997759 | 0.007325557 | -0.538172165 |
| 660 | MTCO2P12   | 0           | 3.73E-08    | 0.019799688 | 1.169007348  |
| 661 | HLA-DRB6   | 0.002034783 | 3.77E-06    | 8.04E-08    | -0.512378637 |
| 662 | MTATP8P2   | 5.71E-06    | 4.63E-28    | 1.58E-16    | -0.749661219 |
| 663 | YWHAZP3    | 0.002891831 | 0.065689248 | 0.035408494 | -0.495202305 |
| 664 | AL450405.1 | 1.15E-05    | 5.02E-07    | 0.005742289 | -0.725999327 |
| 665 | AL078645.1 | 0.024995644 | 0.041445785 | 0.028786683 | -0.387303612 |
| 666 | AC093609.1 | 0.031116186 | 0.003468423 | 0.005148014 | -0.374227674 |
| 667 | AL024493.1 | 8.84E-07    | 8.71E-06    | 3.89E-06    | -0.815931422 |
| 668 | AC111200.2 | 0.006091219 | 0.094091673 | 0.006918179 | -0.460634383 |
| 669 | HLA-DPA1   | 0.002512468 | 3.35E-05    | 4.89E-06    | -0.50217706  |
| 670 | CAP1P2     | 0.027034152 | 0.137446442 | 0.014349119 | -0.382402403 |
| 671 | MTND4P24   | 9.47E-08    | 1.16E-08    | 3.62E-05    | -0.94112987  |
| 672 | TET1P1     | 0.001032984 | 0.001069002 | 0.001315844 | -0.543015516 |
| 673 | RPL18AP7   | 0.008174547 | 0.001303162 | 0.019799688 | -0.445503305 |
| 674 | AF165147.1 | 0.022593239 | 0.028664113 | 0.000124056 | -0.393370245 |
| 675 | EIF3FP3    | 2.41E-05    | 0.005406179 | 0.001452769 | -0.698214148 |
| 676 | AC231533.2 | 0.03322508  | 0.618446591 | 0.026402336 | -0.370274994 |
| 677 | HLA-W      | 0           | 5.62E-17    | 0.001200608 | 1.377286779  |
| 678 | AP002004.1 | 0.044953065 | 0.000572706 | 0.047795046 | -0.351172278 |
| 679 | AC146949.1 | 0.004875576 | 0.001919202 | 0.005148014 | -0.471548757 |
| 680 | AC130472.1 | 0.003645161 | 0.14307993  | 0.005148014 | -0.485096951 |
| 681 | CDKN2AIPNL | 0.016029039 | 0.004293651 | 0.000383415 | -0.411543833 |
| 682 | LINC00987  | 0.000769112 | 0.003855002 | 0.000320907 | -0.555599306 |
| 683 | HLA-DQA2   | 0.016558772 | 0.040968919 | 0.00049096  | -0.409754871 |
| 684 | AC116347.1 | 0.002502367 | 0.001182776 | 0.000132025 | -0.502366659 |
| 685 | AC116366.2 | 0.02731166  | 0.017282718 | 0.001315844 | -0.381807273 |
| 686 | RPS14P8    | 0           | 3.22E-17    | 3.49E-08    | -1.492065861 |
| 687 | AC026877.1 | 0.000227669 | 0.026958566 | 0.000251863 | -0.60789474  |

|     |            |             |             |             |              |
|-----|------------|-------------|-------------|-------------|--------------|
| 688 | PLCXD2     | 0.047013856 | 0.006260528 | 0.030716169 | -0.34803464  |
| 689 | AF111169.1 | 0.000323559 | 0.007991154 | 0.00059449  | -0.593590997 |
| 690 | ATP5J2     | 0.009822486 | 0.01327166  | 0.019799688 | -0.435405855 |
| 691 | ARPC1A     | 0.002408181 | 0.000557885 | 0.007346174 | -0.504297177 |
| 692 | ATP5O      | 0.013660596 | 0.035310343 | 0.001066071 | -0.419478933 |
| 693 | AL591895.1 | 0.005112461 | 0.000819317 | 0.025081888 | -0.469467392 |
| 694 | RPL13AP23  | 0.009229689 | 0.026459696 | 0.025081888 | -0.438822077 |
| 695 | AC090543.2 | 7.34E-05    | 0.00505015  | 0.001231204 | -0.654761075 |
| 696 | IGKV1-5    | 0.017700871 | 1.37E-05    | 8.85E-07    | -0.406045947 |
| 697 | HLA-L      | 2.04E-05    | 2.76E-15    | 0.040143063 | 0.773647301  |
| 698 | APOBEC3C   | 0.002702007 | 0.001735669 | 9.41E-05    | -0.498540587 |
| 699 | MIATNB     | 0.022604318 | 0.0525963   | 0.000486213 | -0.39333619  |
| 700 | UBE2V1     | 0.000631052 | 0.049475838 | 0.021461131 | -0.564503186 |
| 701 | A2M-AS1    | 0.00090493  | 0.011898073 | 0.009182196 | -0.54808437  |
| 702 | TWF2       | 3.95E-06    | 1.84E-07    | 1.51E-10    | -0.762917341 |
| 703 | MTND4P12   | 1.58E-07    | 6.15E-11    | 0.000503667 | 1.047199989  |
| 704 | AC093700.1 | 1.99E-06    | 9.88E-05    | 6.88E-07    | -0.786290566 |
| 705 | SCARNA22   | 0.007056846 | 0.000334049 | 7.91E-05    | -0.45336878  |
| 706 | AC022447.7 | 0.018540054 | 0.004854399 | 0.019799688 | -0.403928487 |
| 707 | TPM3P6     | 0.046593776 | 0.028311945 | 0.035225241 | -0.348678837 |
| 708 | MSNP1      | 0.001347989 | 0.013266374 | 0.004868109 | -0.530966988 |
| 709 | GUSBP3     | 0.023270059 | 0.000238458 | 0.001911715 | -0.391649187 |
| 710 | AC146944.3 | 0.035295152 | 0.000956672 | 3.34E-05    | -0.366441854 |
| 711 | SMIM18     | 0.000365349 | 0.000125198 | 0.000239431 | -0.588537703 |
| 712 | AC024568.1 | 0.012707247 | 0.00018609  | 0.019799688 | -0.421241799 |
| 713 | AC138866.1 | 0.020709835 | 0.01370234  | 0.000289318 | -0.397771351 |
| 714 | AC100810.1 | 0.023687457 | 0.001171966 | 0.005148014 | -0.390619076 |
| 715 | AP003084.1 | 0.006921659 | 0.000437701 | 0.000318701 | -0.45446763  |
| 716 | AP005018.2 | 0.001172653 | 0.135592386 | 0.001996246 | -0.537596933 |
| 717 | MIR100HG   | 0.004995834 | 0.002864809 | 0.005148014 | -0.470585502 |
| 718 | AP004608.1 | 0.013500947 | 0.006263489 | 0.019799688 | -0.419804079 |
| 719 | TOMM20P2   | 0.001825958 | 0.005112185 | 0.022299719 | -0.517265183 |
| 720 | PSMC1P9    | 0.020072817 | 0.180317496 | 0.044001819 | -0.399449141 |
| 721 | A2MP1      | 0.004581939 | 6.61E-06    | 0.000538135 | -0.474745749 |
| 722 | AL137779.1 | 0.0015101   | 0.065688631 | 0.047234218 | -0.525718051 |
| 723 | AC007569.1 | 0.027476264 | 0.531998178 | 0.019799688 | -0.381455671 |
| 724 | AL157935.2 | 0.01249132  | 0.005477465 | 0.025928333 | -0.422253586 |
| 725 | PSMA3-AS1  | 0.00026362  | 0.000540548 | 0.007709116 | -0.601715869 |
| 726 | AC008083.2 | 0.006588946 | 9.36E-05    | 1.79E-05    | -0.457128009 |
| 727 | GNRHR2P1   | 0.00170084  | 0.002558132 | 0.002100142 | -0.52041658  |
| 728 | AC111152.2 | 0.000706931 | 0.012928315 | 0.018655894 | -0.559409205 |
| 729 | HMGB1P6    | 1.02E-05    | 0.004970685 | 0.046591939 | -0.729632196 |
| 730 | LINC02367  | 0.035958178 | 0.003007826 | 0.019799688 | -0.365356911 |



|     |            |             |             |             |              |
|-----|------------|-------------|-------------|-------------|--------------|
| 731 | AC007216.2 | 0.040047945 | 0.2440343   | 0.005148014 | -0.358704712 |
| 732 | AC010168.2 | 0.04631308  | 0.005582266 | 0.005148014 | -0.349095666 |
| 733 | AC015813.1 | 0.010603087 | 0.000393158 | 0.000505584 | -0.431178498 |
| 734 | AC005261.4 | 0.002641879 | 0.002307339 | 0.025708977 | -0.499660759 |
| 735 | AC090181.2 | 0.021137902 | 0.001397718 | 0.005148014 | -0.396587219 |
| 736 | HEATR9     | 0.004673821 | 1.50E-05    | 0.001859817 | -0.473726595 |
| 737 | MTCO3P22   | 3.03E-05    | 0.000179123 | 0.019799688 | -0.690669693 |
| 738 | IGHV3-30   | 0.036031595 | 0.025673954 | 0.019799688 | -0.365235425 |
| 739 | SRGAP2D    | 0.048180071 | 0.096038285 | 0.007130496 | -0.346351867 |
| 740 | AC100814.1 | 0.025997317 | 0.008725654 | 0.019799688 | -0.384921492 |
| 741 | AL160400.1 | 0.048995423 | 0.122740851 | 0.025385927 | -0.345259581 |
| 742 | AC025171.4 | 0.013500947 | 0.018087919 | 0.019799688 | -0.419804079 |
| 743 | AC084036.1 | 0.049447604 | 0.002419039 | 0.005148014 | -0.344695301 |
| 744 | AL359921.2 | 0.013722366 | 0.003892369 | 0.025708977 | -0.419230888 |
| 745 | ZNHIT3     | 0.035325421 | 0.029965738 | 0.017278945 | -0.366391585 |
| 746 | AC022079.1 | 0.04391178  | 0.004578362 | 0.026402336 | -0.352750726 |
| 747 | AC009831.4 | 0.04240332  | 0.019126304 | 0.007346174 | -0.355076296 |
| 748 | CCL18      | 0.02228341  | 1.84E-06    | 1.79E-05    | -0.394170695 |
| 749 | EIF3FP1    | 0.001032984 | 0.000673188 | 0.019799688 | -0.543015516 |
| 750 | CCL3L3     | 0.032478    | 1.33E-10    | 2.12E-13    | -0.37157065  |
| 751 | AC244196.3 | 0.006583896 | 0.001821575 | 0.005148014 | -0.457174192 |
| 752 | AC093462.1 | 0.027647497 | 0.005332739 | 0.019799688 | -0.381078267 |
| 753 | DDX52      | 0.008457799 | 0.009063751 | 0.038186068 | -0.443564401 |
| 754 | AL022322.2 | 0.029863361 | 0.017623232 | 0.019799688 | -0.376746614 |
| 755 | AC009951.1 | 0.006520011 | 7.58E-06    | 6.58E-06    | -0.457685495 |
| 756 | AC005785.2 | 0.032282053 | 0.00278016  | 0.019799688 | -0.371928282 |
| 757 | AC073857.1 | 0.000711792 | 0.007115942 | 0.013517299 | -0.559111961 |
| 758 | AC245100.8 | 0.047095922 | 0.064939985 | 0.036514691 | -0.347921332 |
| 759 | PAGR1      | 0.005260495 | 0.001658171 | 0.005046449 | -0.467947191 |
| 760 | AC245427.5 | 0.000184332 | 7.21E-05    | 0.005148014 | 0.669321332  |
| 761 | AC245427.6 | 2.53E-07    | 1.10E-17    | 0.000136546 | 0.952635712  |
| 762 | LAP3       | 0.02859971  | 0.023666146 | 0.080702121 | -0.379035931 |
| 763 | ALS2       | 0.033815195 | 0.038472828 | 0.104389905 | -0.369226485 |
| 764 | CROT       | 0.022244966 | 0.023375516 | 0.266518941 | -0.394268846 |
| 765 | MYCBP2     | 0.0087509   | 0.041077853 | 0.420655734 | 0.467866102  |
| 766 | CDKL3      | 0.011163879 | 0.001416227 | 0.266518941 | -0.428556374 |
| 767 | TSR3       | 0.03092349  | 0.01014764  | 0.072903683 | -0.374650257 |
| 768 | IL32       | 2.84E-07    | 7.02E-09    | 0.606753903 | 0.952118024  |
| 769 | SEC62      | 0.000295972 | 0.001964598 | 0.144446353 | 0.645914049  |
| 770 | FYN        | 3.46E-05    | 0.000331632 | 0.343406126 | 0.750109739  |
| 771 | PIK3C2A    | 0.004316457 | 0.014389554 | 0.691605072 | -0.477820378 |
| 772 | PLAUR      | 0.037879301 | 0.02669652  | 0.495614735 | 0.379200786  |
| 773 | WIZ        | 0.034544442 | 0.031297628 | 0.941552439 | -0.367854856 |

|     |          |             |             |             |              |
|-----|----------|-------------|-------------|-------------|--------------|
| 774 | PPP5C    | 0.041049492 | 0.024128094 | 0.495614735 | -0.357184378 |
| 775 | TYROBP   | 0.011254687 | 0.004054975 | 0.346379943 | 0.452520948  |
| 776 | CD6      | 0.005442996 | 0.032477718 | 0.099826197 | -0.46634189  |
| 777 | YAF2     | 0.048869926 | 0.027944363 | 0.818571126 | 0.361115477  |
| 778 | XYLT2    | 0.013864245 | 6.37E-05    | 0.149604624 | 0.441946052  |
| 779 | DEF6     | 0.005575153 | 0.007233484 | 0.551177217 | -0.465120278 |
| 780 | VIM      | 0.002318004 | 0.001395255 | 0.99930985  | 0.540744014  |
| 781 | CD44     | 0.010669876 | 0.000528212 | 0.978593899 | 0.455671672  |
| 782 | ARID4A   | 0.000801938 | 0.045502548 | 0.266518941 | -0.553614789 |
| 783 | RNF19A   | 0.007361562 | 0.017885361 | 0.148817369 | -0.450996753 |
| 784 | SPDL1    | 0.025969951 | 0.000332641 | 0.089123175 | -0.38498673  |
| 785 | EPHA3    | 0.02582741  | 0.000191096 | NA          | -0.385335758 |
| 786 | ARAP2    | 0.001491383 | 2.87E-05    | 0.285799439 | 0.56383009   |
| 787 | MRPS10   | 0.034279528 | 0.017566357 | 0.640856102 | 0.38628351   |
| 788 | PIK3CB   | 0.008710687 | 0.028388688 | 0.647733548 | -0.442048151 |
| 789 | MPHOSPH9 | 0.011955464 | 0.044063739 | 0.627257963 | -0.424643055 |
| 790 | ANAPC4   | 0.032155262 | 0.011232072 | 0.333999578 | -0.372169137 |
| 791 | SYNE2    | 0.000231867 | 0.014423038 | 0.469565501 | 0.657927906  |
| 792 | NOP58    | 0.002603276 | 2.16E-05    | 0.606753903 | 0.534262289  |
| 793 | SZRD1    | 0.027842308 | 0.029288754 | 0.741633972 | 0.3997883    |
| 794 | CUL1     | 0.017265798 | 0.000256265 | 0.109963636 | 0.42952538   |
| 795 | MRPL43   | 0.044564358 | 0.006838775 | 0.627257963 | 0.368055135  |
| 796 | ZFR      | 0.030666782 | 0.014775448 | 0.850745458 | 0.393815466  |
| 797 | GDI2     | 0.000618553 | 0.022462293 | 0.276507928 | 0.608983152  |
| 798 | PITHD1   | 0.044980083 | 0.006396126 | 0.563233159 | 0.367358206  |
| 799 | POLR3E   | 0.012368569 | 0.005071502 | 0.240299542 | 0.446580905  |
| 800 | CTDP1    | 0.033588094 | 0.018797459 | 0.154034746 | -0.3696289   |
| 801 | MPC1     | 0.003380153 | 0.001845308 | 0.128034459 | 0.519649205  |
| 802 | WAPL     | 0.047741146 | 0.032538225 | 0.551177217 | -0.346993163 |
| 803 | EPN1     | 0.012801023 | 0.014945345 | 0.9945814   | -0.42080626  |
| 804 | HIPK2    | 0.042502872 | 0.000147696 | 0.336649186 | 0.371505721  |
| 805 | CTSA     | 0.02513525  | 0.007126496 | 0.875437783 | 0.406803323  |
| 806 | GNAI3    | 0.007971309 | 0.033953694 | 0.926226112 | 0.473528184  |
| 807 | YBX1     | 0.01139161  | 0.004454771 | 0.74536186  | 0.451742302  |
| 808 | PLPP1    | 0.049768165 | 0.013599962 | 0.627257963 | -0.344306319 |
| 809 | RRP15    | 0.011804179 | 0.001750063 | 0.119736454 | 0.449499637  |
| 810 | RHOA     | 0.002879427 | 0.01348342  | 0.952577726 | 0.528501425  |
| 811 | IARS2    | 0.036655956 | 0.001142523 | 0.640856102 | 0.381587391  |
| 812 | WDR1     | 0.00965422  | 0.046110792 | 0.060062946 | 0.461734885  |
| 813 | BUD23    | 0.014154599 | 0.001961618 | 0.606753903 | 0.440721313  |
| 814 | ST6GAL1  | 0.020311723 | 0.028181665 | 0.811850916 | -0.398776977 |
| 815 | SEMA3A   | 0.033291838 | 0.024823741 | NA          | -0.370202471 |
| 816 | ACTB     | 1.48E-06    | 4.59E-05    | 0.495614735 | 0.886568592  |

|     |          |             |             |             |              |
|-----|----------|-------------|-------------|-------------|--------------|
| 817 | GPATCH1  | 0.013525125 | 0.028860622 | 0.42897246  | -0.419771272 |
| 818 | MBNL3    | 0.031066378 | 0.026379436 | 0.144446353 | -0.374332719 |
| 819 | UBE2A    | 0.020598921 | 0.03407711  | 0.967517596 | 0.419022222  |
| 820 | MLLT10   | 0.042159838 | 0.011420805 | 0.305871368 | 0.372066211  |
| 821 | PCM1     | 0.044693201 | 0.003856992 | 0.060450123 | -0.351577045 |
| 822 | THOC1    | 0.042031753 | 0.000472851 | 0.640856102 | 0.37227843   |
| 823 | SAR1A    | 0.030594438 | 0.004779448 | 0.640856102 | 0.393982009  |
| 824 | PAFAH1B3 | 0.00570832  | 0.004293703 | 0.266518941 | -0.463916162 |
| 825 | CNOT4    | 0.040794552 | 0.01076354  | 0.345059898 | 0.374420578  |
| 826 | RSBN1    | 0.020092513 | 0.035531473 | 0.820811727 | -0.399412524 |
| 827 | CXCL2    | 0.003934474 | 0.00254289  | 0.296544194 | 0.51302724   |
| 828 | DLG3     | 0.018897734 | 0.023825069 | 0.231743843 | -0.402903309 |
| 829 | PILRA    | 0.038391516 | 0.009667977 | 0.58450159  | 0.37830295   |
| 830 | CPNE3    | 0.042718073 | 0.016602158 | 0.974471964 | 0.371143332  |
| 831 | EPS15    | 0.028530743 | 8.37E-05    | 0.073256471 | -0.379205394 |
| 832 | B4GALT1  | 0.001799886 | 0.000710333 | 0.773350076 | 0.554261186  |
| 833 | CHMP5    | 0.049497759 | 0.008365223 | 0.65975503  | -0.344630517 |
| 834 | RBM22    | 0.02481712  | 0.012536345 | 0.087161363 | -0.387718476 |
| 835 | TXLNG    | 0.019379742 | 4.52E-05    | 0.296544194 | 0.422759202  |
| 836 | PPP1R15A | 0.004174421 | 0.004712634 | 0.529837243 | 0.51037438   |
| 837 | KLHL42   | 0.041962692 | 0.031024819 | 0.109481031 | -0.355738207 |
| 838 | PTPN4    | 0.031876491 | 0.006170078 | 0.539079711 | -0.372714051 |
| 839 | RPL6     | 1.58E-07    | 5.92E-07    | 0.266320897 | 1.002223237  |
| 840 | RPLP0    | 0.000432517 | 0.000315152 | 0.397687554 | 0.627526882  |
| 841 | PEBP1    | 0.000948551 | 0.00100735  | 0.495614735 | 0.586359132  |
| 842 | FXD5     | 0.000119973 | 0.000321803 | 0.670529407 | 0.690864535  |
| 843 | ZNF302   | 0.008173316 | 0.013233879 | 0.410691503 | -0.445505463 |
| 844 | YPEL3    | 0.00383508  | 0.002347177 | 0.06662965  | -0.482910439 |
| 845 | GLG1     | 0.033337447 | 0.000427869 | 0.084704613 | -0.370105427 |
| 846 | OSBPL8   | 0.036014267 | 0.00300926  | 0.642994439 | -0.365261391 |
| 847 | LAMB1    | 0.011345086 | 0.012806753 | 0.627257963 | -0.427628035 |
| 848 | CMTM6    | 0.010032889 | 0.000502815 | 0.083528363 | -0.434249289 |
| 849 | PSME1    | 9.28E-05    | 0.002329419 | 0.741633972 | 0.703519575  |
| 850 | TOX4     | 0.015691686 | 0.031591429 | 0.785947857 | 0.435416461  |
| 851 | CLSPN    | 0.020999495 | 0.011009096 | 0.266518941 | -0.396982144 |
| 852 | HOOK2    | 0.016088599 | 0.000958805 | 0.627257963 | -0.411403314 |
| 853 | BTA1F1   | 0.042986459 | 0.039661543 | 0.648764501 | -0.354188037 |
| 854 | WAC      | 0.005237958 | 4.07E-06    | 0.20833475  | 0.49757598   |
| 855 | HSP90AB1 | 0.004307146 | 0.000367987 | 0.062544597 | 0.50865046   |
| 856 | CIRBP    | 0.013825169 | 0.003383439 | 0.6649977   | 0.442116878  |
| 857 | GADD45B  | 0.040183858 | 6.39E-06    | 0.261228282 | 0.375394955  |
| 858 | CABIN1   | 0.028348621 | 0.005534434 | 0.266518941 | -0.379561224 |
| 859 | CYTH4    | 0.034435042 | 0.012807119 | 0.912879282 | 0.385961158  |

|     |          |             |             |             |              |
|-----|----------|-------------|-------------|-------------|--------------|
| 860 | SNU13    | 0.039179439 | 0.000186608 | 0.143151757 | 0.377199368  |
| 861 | CYB5R3   | 0.041324822 | 0.000156107 | 0.589807233 | 0.373525574  |
| 862 | ST13     | 0.00932599  | 5.61E-06    | 0.067075658 | 0.463883691  |
| 863 | CERK     | 0.014479799 | 0.002327683 | 0.222129644 | 0.439654717  |
| 864 | PSMC6    | 0.003719431 | 0.002118471 | 0.884079585 | 0.516079148  |
| 865 | DDHD1    | 0.000890285 | 0.002944305 | 0.627257963 | 0.589823007  |
| 866 | DAAM1    | 0.020852819 | 6.35E-05    | 0.627257963 | 0.41832662   |
| 867 | ERH      | 0.047858469 | 0.000194487 | 0.464993185 | 0.362642801  |
| 868 | YY1      | 0.048504009 | 0.036974306 | 0.606753903 | 0.361627919  |
| 869 | RABGGTA  | 0.007064548 | 0.031973194 | 0.495614735 | -0.453296682 |
| 870 | PSMA7    | 0.000341677 | 0.008843813 | 0.640856102 | 0.639510378  |
| 871 | RNMT     | 0.045947857 | 0.001725442 | 0.155877982 | 0.365734441  |
| 872 | RBBP8    | 0.026392652 | 0.000509946 | 0.085045933 | -0.383925147 |
| 873 | PLP2     | 0.000480715 | 8.08E-05    | 0.09915675  | 0.622051175  |
| 874 | MAGED2   | 0.018248343 | 1.20E-07    | 0.714565344 | 0.42611161   |
| 875 | DNAJC3   | 0.024088347 | 7.22E-07    | 0.057789016 | 0.409651108  |
| 876 | SUPT20H  | 0.035856575 | 0.007679053 | 0.606333524 | -0.365450142 |
| 877 | UBFD1    | 0.048101509 | 0.010976498 | 0.169914657 | -0.346454732 |
| 878 | ZNF106   | 0.01405511  | 0.004406843 | 0.085095192 | -0.417899883 |
| 879 | SPG11    | 0.008140648 | 0.00012823  | 0.138011375 | -0.445718994 |
| 880 | EIF3E    | 0.009391232 | 0.01552143  | 0.652553109 | 0.463458588  |
| 881 | EEF1D    | 0.000211413 | 2.37E-07    | 0.832378691 | 0.662688307  |
| 882 | LEPROTL1 | 0.018068683 | 0.004551287 | 0.741633972 | 0.426750567  |
| 883 | CCDC130  | 0.000808472 | 0.000246702 | 0.177549077 | -0.553249684 |
| 884 | FAM32A   | 0.016042011 | 0.000619328 | 0.327340645 | 0.433996824  |
| 885 | TBCB     | 0.010008964 | 0.013868583 | 0.899663927 | 0.459570344  |
| 886 | CDC37    | 0.024993309 | 0.001014637 | 0.052529983 | -0.387310336 |
| 887 | ARRDC2   | 0.023756044 | 0.01671847  | 0.177035826 | 0.410627484  |
| 888 | RUNDC3B  | 0.035528597 | 0.029098343 | 0.814358224 | -0.366030719 |
| 889 | GTPBP10  | 0.01195701  | 0.031736342 | 0.609509323 | -0.424635126 |
| 890 | SSBP1    | 0.002458399 | 0.002255286 | 0.640856102 | 0.537501681  |
| 891 | TAX1BP1  | 0.00043015  | 0.00277398  | 0.640856102 | 0.62778786   |
| 892 | GARS     | 0.017155924 | 0.000341525 | 0.085095192 | 0.429944682  |
| 893 | RPA3     | 0.030930939 | 0.020405344 | 0.585565794 | -0.374631241 |
| 894 | TMEM176B | 0.041099899 | 0.002621516 | 0.495614735 | 0.373924655  |
| 895 | EIF4H    | 0.025416009 | 0.031198111 | 0.34885889  | 0.406059457  |
| 896 | CCDC6    | 0.015937094 | 0.041196755 | 0.154034746 | -0.411891601 |
| 897 | RPL28    | 0.000326652 | 1.00E-06    | 0.370722542 | 0.641583406  |
| 898 | P2RX1    | 0.042688782 | 0.00643476  | 0.741633972 | -0.354639373 |
| 899 | RNF167   | 0.006712234 | 0.025871671 | 0.805859721 | 0.484010856  |
| 900 | CCL2     | 0.00540553  | 0.002683831 | 0.296544194 | 0.495868537  |
| 901 | MLX      | 0.002799381 | 0.000353397 | 0.061290154 | -0.496798989 |
| 902 | RANGRF   | 0.033707563 | 0.03233833  | 0.05719694  | -0.369414638 |

|     |          |             |             |             |              |
|-----|----------|-------------|-------------|-------------|--------------|
| 903 | SUPT6H   | 7.83E-06    | 0.005158573 | 0.728265686 | -0.737919733 |
| 904 | CLNK     | 0.016061265 | 0.024013535 | NA          | -0.411473125 |
| 905 | EHD1     | 0.025296541 | 0.013209422 | 0.879789303 | 0.40639257   |
| 906 | CCKBR    | 0.003645161 | 0.008734403 | NA          | -0.485096951 |
| 907 | DDX6     | 0.004255603 | 0.019833236 | 0.627257963 | 0.509326907  |
| 908 | AMBRA1   | 0.026935263 | 0.032816513 | 0.262930867 | -0.382646826 |
| 909 | RPS13    | 1.26E-06    | 2.64E-07    | 0.364968765 | 0.896367024  |
| 910 | NDUFS8   | 0.000825863 | 0.008557167 | 0.680782684 | -0.552313334 |
| 911 | PRDM4    | 0.043703838 | 1.17E-07    | 0.088403625 | 0.369464235  |
| 912 | SELPLG   | 0.008573543 | 0.00373506  | 0.055975497 | 0.469101276  |
| 913 | PTGES3   | 0.018870116 | 0.003616803 | 0.483526135 | 0.424532996  |
| 914 | C12orf49 | 0.001062338 | 0.032028131 | 0.096265628 | -0.541908845 |
| 915 | TPI1     | 0.003934726 | 0.023770111 | 0.918163965 | 0.513018399  |
| 916 | GOLT1B   | 0.024000253 | 0.014678593 | 0.680783536 | -0.389790089 |
| 917 | ADTRP    | 0.013500947 | 0.03039077  | NA          | -0.419804079 |
| 918 | FBXO5    | 0.01141058  | 0.004060533 | 0.073607426 | -0.427299906 |
| 919 | PTK7     | 0.000597153 | 0.000330064 | NA          | -0.567011327 |
| 920 | CNOT6    | 0.001987469 | 0.008023135 | 0.542109754 | -0.513508137 |
| 921 | ARRDC3   | 0.002291806 | 0.007381982 | 0.593388389 | 0.541356949  |
| 922 | BRIX1    | 0.021067704 | 0.002480855 | 0.084260243 | 0.417674148  |
| 923 | ST8SIA4  | 0.042723818 | 0.000634486 | 0.05383061  | -0.354580052 |
| 924 | NR3C1    | 0.000880311 | 0.000318215 | 0.071463114 | 0.590478797  |
| 925 | ATP6V0E1 | 5.71E-06    | 6.23E-05    | 0.879298159 | 0.829149913  |
| 926 | UBE3A    | 0.015080172 | 0.046224782 | 0.647733548 | 0.437616065  |
| 927 | RPL24    | 4.86E-05    | 0.000521828 | 0.606753903 | 0.733737687  |
| 928 | SCAP     | 0.026508522 | 0.041002481 | 0.254769117 | -0.383659496 |
| 929 | ABHD14B  | 0.000590493 | 0.003907198 | 0.188227385 | -0.567409025 |
| 930 | EIF4G1   | 0.020875639 | 0.026813894 | 0.899723247 | 0.418262013  |
| 931 | DOK1     | 0.020447952 | 0.000311441 | 0.072903683 | -0.398379606 |
| 932 | PDCL3    | 0.031180513 | 0.024649008 | 0.495614735 | 0.392575384  |
| 933 | IL1R1    | 0.003645161 | 0.007132906 | NA          | -0.485096951 |
| 934 | PASK     | 0.003247207 | 0.008676505 | 0.282364998 | -0.48966488  |
| 935 | PRKD3    | 0.012706363 | 1.87E-05    | 0.258994911 | 0.444867422  |
| 936 | WIPF1    | 0.002651884 | 0.023699709 | 0.268542367 | 0.533145794  |
| 937 | COX7A2L  | 0.041306736 | 0.034168368 | 0.127068762 | -0.356795315 |
| 938 | NFE2L2   | 0.012562212 | 1.05E-05    | 0.193648357 | 0.445608325  |
| 939 | EPHA4    | 0.004614355 | 0.0012645   | 0.354896898 | 0.504610432  |
| 940 | TMEM59   | 0.00731207  | 0.000286734 | 0.741633972 | 0.478587122  |
| 941 | SRSF4    | 0.010454201 | 0.004777382 | 0.369569582 | 0.456881674  |
| 942 | HDAC1    | 0.009777476 | 0.006891142 | 0.064963226 | 0.460958704  |
| 943 | SFPQ     | 0.017317467 | 0.019238465 | 0.741633972 | 0.429351631  |
| 944 | MEF2D    | 0.010491636 | 0.005940253 | 0.50280857  | 0.456644125  |
| 945 | PRDM2    | 0.033816079 | 0.021810186 | 0.094727654 | -0.369223862 |

|     |           |             |             |             |              |
|-----|-----------|-------------|-------------|-------------|--------------|
| 946 | CD2       | 0.000166877 | 0.002242675 | 0.704606892 | 0.673712761  |
| 947 | GNPAT     | 0.041685721 | 0.032672316 | 0.346379943 | -0.356185988 |
| 948 | MTR       | 0.00060274  | 0.007051955 | 0.147906751 | -0.566552436 |
| 949 | RCN2      | 0.011649328 | 1.20E-06    | 0.606753903 | 0.450369074  |
| 950 | SPCS2     | 0.017178303 | 0.000609335 | 0.627257963 | 0.429869533  |
| 951 | HMG3      | 0.005590966 | 0.010695369 | 0.952440918 | 0.493964877  |
| 952 | MYL12B    | 2.37E-06    | 5.22E-05    | 0.563581388 | 0.864999951  |
| 953 | CCNI      | 0.000154914 | 0.003227213 | 0.627257963 | 0.677386871  |
| 954 | UBE2B     | 0.002152989 | 5.69E-06    | 0.378729945 | 0.544807297  |
| 955 | NDUFA8    | 0.001535572 | 0.037186946 | 0.234783817 | -0.524978323 |
| 956 | FCF1      | 0.002125529 | 0.038346758 | 0.433814406 | -0.510365731 |
| 957 | IFT43     | 0.00173335  | 0.014956345 | 0.493297094 | -0.519567063 |
| 958 | SLIRP     | 0.008576226 | 0.01516664  | 0.470783579 | 0.469085949  |
| 959 | LGALS1    | 0.013500947 | 0.017754756 | 0.266518941 | -0.419804079 |
| 960 | PYROXD2   | 0.031933274 | 0.006905897 | 0.222822765 | -0.372610143 |
| 961 | PCMT1     | 0.003862351 | 0.036290007 | 0.551177217 | 0.513889893  |
| 962 | MTERF2    | 0.019301528 | 0.040506454 | 0.640856102 | -0.401642909 |
| 963 | COIL      | 0.001170318 | 0.001593316 | 0.576730826 | -0.537708594 |
| 964 | SPOP      | 0.011552585 | 0.016184872 | 0.971661722 | 0.450895545  |
| 965 | PAPD5     | 0.025642257 | 0.000213961 | 0.20833475  | -0.385796002 |
| 966 | RNF2      | 0.024531595 | 0.000413724 | 0.466523975 | 0.408430759  |
| 967 | RPL5      | 2.27E-06    | 0.000611721 | 0.886794374 | 0.869907944  |
| 968 | HNRNPA2B1 | 0.002363897 | 0.045119927 | 0.585565794 | 0.539679368  |
| 969 | SRGN      | 1.58E-07    | 9.30E-05    | 0.70179449  | 0.967513373  |
| 970 | PFDN5     | 0.000287797 | 0.008921031 | 0.606753903 | 0.64736257   |
| 971 | AGO2      | 0.000577615 | 0.00198062  | 0.09591105  | 0.612531062  |
| 972 | CHD6      | 0.029926614 | 0.001949061 | 0.606753903 | 0.395353342  |
| 973 | TRERF1    | 0.047565684 | 0.002876216 | 0.160558605 | -0.347251329 |
| 974 | SNRPC     | 0.002130389 | 0.000483784 | 0.3257669   | 0.54544635   |
| 975 | TBCC      | 0.01066148  | 0.027533456 | 0.661487852 | 0.455725029  |
| 976 | MAD2L1BP  | 0.026953128 | 0.005855601 | 0.249356091 | -0.382599864 |
| 977 | KLHDC3    | 0.015065021 | 0.02711809  | 0.180874701 | -0.414797198 |
| 978 | RREB1     | 0.040591282 | 0.001184211 | 0.531318552 | -0.357879918 |
| 979 | 6-Sep     | 0.029640048 | 0.020123391 | 0.812731715 | 0.395929054  |
| 980 | NDUFA1    | 7.90E-05    | 0.000853005 | 0.545587899 | 0.711593924  |
| 981 | ARMC7     | 0.015192696 | 0.000618552 | 0.589847165 | 0.4372296    |
| 982 | IL1B      | 0.000892273 | 0.00018696  | 0.186714706 | 0.589715706  |
| 983 | SNRPD2    | 0.00046689  | 0.000360771 | 0.606753903 | 0.62351423   |
| 984 | RBCK1     | 0.031250931 | 7.03E-06    | 0.053770031 | -0.373972654 |
| 985 | ZNF133    | 0.01552099  | 0.008375317 | 0.390994099 | 0.436020178  |
| 986 | S1PR4     | 0.03356136  | 0.010041093 | 0.551177217 | 0.3877144    |
| 987 | HNRNPR    | 0.002264945 | 0.000559884 | 0.963681702 | 0.541986296  |
| 988 | ROMO1     | 0.001247554 | 0.024070799 | 0.640856102 | 0.573399397  |

|      |          |             |             |             |              |
|------|----------|-------------|-------------|-------------|--------------|
| 989  | CEP250   | 0.038427025 | 0.021389432 | 0.089299604 | -0.36106658  |
| 990  | EVI2A    | 0.000351619 | 0.007766839 | 0.130746931 | -0.590256541 |
| 991  | COX7C    | 0.010166846 | 0.00588764  | 0.648757413 | 0.458593631  |
| 992  | APOL2    | 0.030402973 | 0.012721159 | 0.261570292 | 0.394401637  |
| 993  | POT1     | 0.029322107 | 1.45E-06    | 0.970478149 | -0.377829435 |
| 994  | MINDY2   | 0.012897323 | 0.001408512 | 0.146681809 | -0.420387455 |
| 995  | PHF20L1  | 0.00818954  | 1.18E-07    | 0.217269961 | 0.471896405  |
| 996  | RNASE1   | 0.00761546  | 0.009191196 | 0.390994099 | 0.476270281  |
| 997  | NEDD8    | 0.006572628 | 0.004778358 | 0.065018881 | -0.457243832 |
| 998  | DAD1     | 0.04480743  | 3.25E-06    | 0.398946534 | -0.351385987 |
| 999  | ZSCAN10  | 0.015895303 | 0.011225718 | 0.627257963 | -0.412029955 |
| 1000 | RPL36    | 0           | 1.16E-07    | 0.349425163 | 1.167175773  |
| 1001 | HELZ2    | 0.037542737 | 0.04930718  | 0.249960982 | -0.362548261 |
| 1002 | GMFG     | 0.001033394 | 0.001055293 | 0.640856102 | 0.583110406  |
| 1003 | LRRC47   | 0.000125055 | 0.015080825 | 0.26095898  | -0.63319182  |
| 1004 | COX4I1   | 7.73E-05    | 0.005525091 | 0.818836883 | 0.712518896  |
| 1005 | SH3BGRL  | 0.001052648 | 0.018919006 | 0.235042598 | -0.54237248  |
| 1006 | SH3BP5   | 0.044796257 | 0.006899108 | 0.979228329 | 0.367649802  |
| 1007 | KIF3A    | 0.005345812 | 1.99E-05    | 0.292228439 | 0.49642658   |
| 1008 | RPL27    | 0.008751436 | 4.24E-05    | 0.285798932 | 0.467860196  |
| 1009 | PDHA1    | 0.031178272 | 0.046421797 | 0.363054345 | 0.392582076  |
| 1010 | DNAJB1   | 6.27E-05    | 0.002823155 | 0.627257963 | 0.722217293  |
| 1011 | PTPRE    | 0.023505713 | 0.026249942 | 0.960576339 | 0.411349494  |
| 1012 | RAN      | 0.022054353 | 0.026772154 | 0.141099008 | -0.394766256 |
| 1013 | DCTN4    | 0.001595354 | 0.039693077 | 0.629277778 | -0.523280954 |
| 1014 | SPART    | 0.049874819 | 0.00078336  | 0.248517793 | 0.359737368  |
| 1015 | SRRM1    | 0.022088157 | 8.35E-05    | 0.234934532 | 0.415319199  |
| 1016 | RTN3     | 0.035854902 | 0.02052412  | 0.414963542 | 0.38306569   |
| 1017 | BTG1     | 0.001564169 | 0.007047962 | 0.072903683 | 0.561433518  |
| 1018 | ARL8B    | 0.00974203  | 0.000789575 | 0.494126969 | 0.461188571  |
| 1019 | EMC7     | 7.00E-05    | 0.000377661 | 0.264979927 | 0.717124142  |
| 1020 | PRPF38B  | 0.011718862 | 0.00258502  | 0.495614735 | 0.449982583  |
| 1021 | TSHB     | 0.006172653 | 0.029431128 | NA          | -0.460038506 |
| 1022 | LAMTOR5  | 0.02932681  | 0.034188561 | 0.300222058 | -0.377820681 |
| 1023 | YWHAQ    | 1.07E-06    | 1.55E-05    | 0.36023221  | 0.902990265  |
| 1024 | LDHA     | 0.000238211 | 2.95E-05    | 0.062036132 | 0.656617738  |
| 1025 | TIMM17A  | 0.043028281 | 0.005660211 | 0.627257963 | -0.354118555 |
| 1026 | PUM1     | 0.018074648 | 0.01905013  | 0.849970332 | 0.426731808  |
| 1027 | CTSL     | 0.039903447 | 0.028620893 | 0.495614735 | 0.375938232  |
| 1028 | SNX14    | 0.001755508 | 0.013081729 | 0.627257963 | 0.555471964  |
| 1029 | OS9      | 0.040520106 | 0.048456354 | 0.259660593 | 0.374887309  |
| 1030 | MPHOSPH6 | 0.010175526 | 0.009543043 | 0.086572518 | -0.433485936 |
| 1031 | ISCU     | 1.58E-07    | 1.06E-05    | 0.074702833 | 0.973745033  |

|      |            |             |             |             |              |
|------|------------|-------------|-------------|-------------|--------------|
| 1032 | SCYL2      | 0.048427656 | 0.006366193 | 0.287348589 | -0.346013191 |
| 1033 | SLC41A2    | 0.037198946 | 0.005774023 | 0.390994099 | 0.380574845  |
| 1034 | RNASEH2B   | 0.018356291 | 0.0266803   | 0.640856102 | -0.404074084 |
| 1035 | RPL13AP25  | 1.52E-06    | 2.29E-06    | 0.266518941 | 0.885125018  |
| 1036 | GPNMB      | 0.039903447 | 0.031720499 | 0.495614735 | 0.375938232  |
| 1037 | RAC1       | 0.002331418 | 0.000332855 | 0.852500615 | 0.540438844  |
| 1038 | RSAD1      | 0.048552711 | 0.003028039 | 0.296544194 | 0.361562581  |
| 1039 | MRPL50     | 0.01009548  | 0.014680676 | 0.30133795  | -0.433881158 |
| 1040 | RPL35      | 0.026934253 | 0.017541257 | 0.984282961 | 0.402013865  |
| 1041 | CNPY3      | 0.030849284 | 0.002294829 | 0.505975241 | 0.39336514   |
| 1042 | CASP1      | 0.026324822 | 0.00086553  | 0.070304743 | -0.384081548 |
| 1043 | LRRC49     | 0.003645161 | 0.00892838  | 0.072903683 | -0.485096951 |
| 1044 | UACA       | 0.001455558 | 0.00367099  | 0.272043811 | -0.527439618 |
| 1045 | PAK6       | 0.021669686 | 0.030925446 | 0.072903683 | -0.395759636 |
| 1046 | IFI44      | 0.00500101  | 0.002784954 | 0.072903683 | -0.470530096 |
| 1047 | RPL7P9     | 0.036191718 | 0.005395463 | 0.266518941 | 0.382496251  |
| 1048 | RAB1A      | 0.039764977 | 0.024528179 | 0.941203224 | 0.376073522  |
| 1049 | ATRAID     | 0.040310934 | 0.038708854 | 0.636523818 | -0.358247986 |
| 1050 | CH25H      | 0.013500947 | 0.03096009  | NA          | -0.419804079 |
| 1051 | RPS24      | 7.73E-06    | 0.000308888 | 0.811805847 | 0.81567932   |
| 1052 | ASNSD1     | 0.026033237 | 3.90E-07    | 0.13044506  | 0.404417757  |
| 1053 | ARHGAP24   | 0.013500947 | 0.031515229 | 0.072903683 | -0.419804079 |
| 1054 | BMPR1B     | 2.39E-05    | 3.10E-05    | 0.640856102 | -0.698638223 |
| 1055 | RAP1GDS1   | 0.018801749 | 0.000540688 | 0.296544194 | 0.424664305  |
| 1056 | 11-Sep     | 0.03096124  | 0.003540012 | 0.741633972 | -0.374561253 |
| 1057 | SCARB2     | 0.032123887 | 0.039641789 | 0.125068914 | -0.372234207 |
| 1058 | PPP3CA     | 0.000231393 | 1.61E-06    | 0.078928538 | 0.658062197  |
| 1059 | SCAF11     | 0.025549587 | 0.01453152  | 0.120120921 | -0.386015713 |
| 1060 | LLPH       | 0.007704059 | 0.023811741 | 0.077857718 | -0.448669104 |
| 1061 | AC078814.1 | 0.023524967 | 0.040778684 | 0.981447702 | 0.411286698  |
| 1062 | PHLDA1     | 0.032723155 | 0.00026463  | 0.266518941 | 0.389280816  |
| 1063 | GLTP       | 0.025479641 | 0.000763277 | 0.718028848 | -0.386165106 |
| 1064 | KANSL2     | 0.048562717 | 0.00041477  | 0.864234777 | 0.361544602  |
| 1065 | GALNT6     | 0.037726248 | 0.000276159 | 0.741633972 | -0.362202093 |
| 1066 | TMBIM6     | 0           | 1.49E-07    | 0.060450123 | 1.201352978  |
| 1067 | GPR65      | 0.044090556 | 0.023391111 | 0.640856102 | 0.368849128  |
| 1068 | SERF2      | 0.000367306 | 9.42E-06    | 0.797866678 | 0.635722328  |
| 1069 | SRP14      | 1.58E-07    | 2.17E-06    | 0.736764777 | 1.022655065  |
| 1070 | TLE3       | 4.13E-05    | 0.001793801 | 0.551177217 | 0.741689619  |
| 1071 | ARMC5      | 0.042040149 | 3.90E-06    | 0.814999037 | -0.35561623  |
| 1072 | FTO        | 0.000380342 | 0.000336486 | 0.204092451 | -0.586781279 |
| 1073 | KATNB1     | 0.00916129  | 0.033399919 | 0.109481031 | -0.439243139 |
| 1074 | G6PC3      | 0.038170412 | 0.020914573 | 0.741633972 | -0.36144608  |



|      |            |             |             |             |              |
|------|------------|-------------|-------------|-------------|--------------|
| 1075 | MINK1      | 0.009175904 | 0.015854581 | 0.222822765 | -0.439154489 |
| 1076 | SLC39A3    | 0.017673285 | 0.025663933 | 0.266518941 | -0.406136663 |
| 1077 | DPP9       | 0.047864971 | 0.000350079 | 0.609690342 | 0.362635649  |
| 1078 | SOD1       | 0.000177672 | 0.001724377 | 0.259752408 | 0.670796254  |
| 1079 | EMP3       | 5.43E-06    | 2.36E-07    | 0.166715067 | 0.831335908  |
| 1080 | ZNF473     | 0.044322644 | 0.022312809 | 0.640856102 | -0.352147138 |
| 1081 | CFAP74     | 0.021669686 | 0.002525067 | NA          | -0.395759636 |
| 1082 | RPL11      | 0.000209425 | 4.15E-07    | 0.266518941 | 0.663163776  |
| 1083 | XCL2       | 0.011149328 | 0.025010968 | 0.782767973 | -0.428618255 |
| 1084 | PPOX       | 0.03672688  | 0.034121077 | 0.356630351 | -0.363979023 |
| 1085 | SETDB1     | 0.015698535 | 0.0415381   | 0.072903683 | -0.412737758 |
| 1086 | MRPL9      | 0.037630326 | 0.049916611 | 0.51938818  | 0.379693655  |
| 1087 | C1orf131   | 0.000932769 | 0.01750419  | 0.051369619 | -0.546552406 |
| 1088 | GUK1       | 0.001189224 | 0.000915089 | 0.255524859 | 0.57611817   |
| 1089 | MEIS1      | 0.013500947 | 0.027111142 | 0.072903683 | -0.419804079 |
| 1090 | AL078621.1 | 0.007625876 | 0.021876007 | 0.84128288  | 0.476188003  |
| 1091 | EAF2       | 0.011481567 | 3.38E-05    | 0.217626851 | 0.451230879  |
| 1092 | ECE2       | 0.016895082 | 0.007612463 | 0.811850916 | -0.408728715 |
| 1093 | OCIAD2     | 0.008376555 | 6.14E-05    | 0.495614735 | 0.470475601  |
| 1094 | RPS3A      | 9.25E-06    | 2.66E-05    | 0.200111011 | 0.809131063  |
| 1095 | NDUFS6     | 0.018774856 | 0.044629428 | 0.42616745  | 0.424746211  |
| 1096 | 6-Mar      | 0.003069472 | 0.048803512 | 0.849674634 | 0.524973932  |
| 1097 | YIPF5      | 0.034963544 | 0.001093781 | 0.640856102 | 0.384838023  |
| 1098 | MMS22L     | 0.002300865 | 0.041192628 | 0.342630969 | -0.506475886 |
| 1099 | RARS2      | 0.019748974 | 0.036774013 | 0.486013386 | -0.400394474 |
| 1100 | DYNLT1     | 0.00083085  | 0.000104085 | 0.06158068  | -0.552000962 |
| 1101 | AC004453.1 | 0.008259232 | 0.019804163 | 0.627257963 | 0.47136877   |
| 1102 | FRMPD3     | 0.030251026 | 0.00492984  | 0.627257963 | -0.375993991 |
| 1103 | NDUFB9     | 0.002003219 | 0.038924981 | 0.879142142 | 0.548756976  |
| 1104 | AK3        | 0.011145698 | 0.001860084 | 0.232298312 | 0.453126044  |
| 1105 | ZCCHC7     | 0.018675241 | 0.038340286 | 0.266518941 | -0.403502475 |
| 1106 | CBWD5      | 0.026511679 | 0.002189553 | 0.401152436 | 0.40311892   |
| 1107 | SURF2      | 0.001932927 | 0.008388328 | 0.073599917 | -0.514792033 |
| 1108 | GSTO1      | 0.000581087 | 0.005590843 | 0.281561376 | -0.568110005 |
| 1109 | PPRC1      | 0.020859352 | 0.004625051 | 0.086324584 | -0.397373179 |
| 1110 | EIF3M      | 0.006498138 | 0.002299593 | 0.257792189 | 0.485958656  |
| 1111 | PTPRJ      | 0.037777855 | 0.038404843 | 0.296544194 | 0.379405233  |
| 1112 | EI24       | 0.017843918 | 0.042504113 | 0.551048972 | -0.40560336  |
| 1113 | PPP4C      | 0.025451329 | 0.029826319 | 0.621098709 | -0.386231116 |
| 1114 | TMEM219    | 0.044976169 | 0.030357648 | 0.741633972 | 0.367365543  |
| 1115 | ITGB1      | 0.040283536 | 0.013385939 | 0.134555011 | 0.375211904  |
| 1116 | PIP4K2A    | 0.015054353 | 0.013518142 | 0.450501818 | -0.414833071 |
| 1117 | UBC        | 4.42E-07    | 2.59E-06    | 0.193824834 | 0.934596059  |

|      |          |             |             |             |              |
|------|----------|-------------|-------------|-------------|--------------|
| 1118 | FRMD4A   | 0.008667824 | 0.026971151 | 0.05587409  | -0.442318611 |
| 1119 | PARP8    | 0.042349378 | 5.89E-07    | 0.547385325 | 0.371751478  |
| 1120 | CACUL1   | 0.017497664 | 2.87E-06    | 0.741633972 | 0.428666712  |
| 1121 | MZT2B    | 0.04495701  | 0.030549967 | 0.970478149 | 0.367389203  |
| 1122 | ARL14EP  | 0.034573228 | 7.39E-07    | 0.06126599  | 0.385659087  |
| 1123 | C18orf25 | 0.000612619 | 0.007317976 | 0.105603372 | -0.565759791 |
| 1124 | HOMER1   | 2.76E-05    | 3.68E-05    | 0.072903683 | -0.693642937 |
| 1125 | PAN3     | 0.000148886 | 0.000175389 | 0.640856102 | 0.679498007  |
| 1126 | CWC27    | 0.011921975 | 0.003139167 | 0.685229789 | -0.424812586 |
| 1127 | RANBP2   | 0.016007859 | 0.00713928  | 0.95579127  | 0.434137434  |
| 1128 | SPHKAP   | 0.02849293  | 0.000205712 | NA          | -0.379282714 |
| 1129 | GRAP     | 0.010322486 | 0.028138894 | 0.085045933 | -0.432711916 |
| 1130 | ADAMTS1  | 0.002044347 | 0.000491927 | NA          | -0.512174715 |
| 1131 | OXNAD1   | 0.015678082 | 0.002702983 | 0.640856102 | 0.435424812  |
| 1132 | ELMSAN1  | 0.000116123 | 0.000121559 | 0.330315127 | 0.692569839  |
| 1133 | UQCRB    | 0.001633546 | 0.009664355 | 0.728364774 | 0.559131941  |
| 1134 | HKDC1    | 0.003645161 | 0.007203601 | NA          | -0.485096951 |
| 1135 | GALK2    | 0.018635755 | 0.006556651 | 0.495614735 | -0.403625594 |
| 1136 | EIF4A2   | 3.19E-06    | 0.000210511 | 0.170635308 | 0.855037018  |
| 1137 | ATP2B2   | 0.015656082 | 0.018471454 | 0.627257963 | -0.412857907 |
| 1138 | RAB28    | 0.003262768 | 0.001273943 | 0.278398527 | -0.489426055 |
| 1139 | TMED4    | 0.000111672 | 0.000973544 | 0.495614735 | 0.694638272  |
| 1140 | FCER1G   | 0.04387384  | 0.000397162 | 0.217626851 | 0.369188932  |
| 1141 | PAXBP1   | 0.00287081  | 0.005220831 | 0.606753903 | 0.528654727  |
| 1142 | CHAF1B   | 0.014522347 | 0.00068365  | 0.627257963 | -0.416409259 |
| 1143 | PTMS     | 0.04830137  | 0.032224345 | 0.627257963 | -0.346181917 |
| 1144 | ADIPOR1  | 0.003934979 | 0.000124876 | 0.533860044 | 0.513015969  |
| 1145 | THEM4    | 0.009722997 | 2.08E-07    | 0.071017832 | 0.46132235   |
| 1146 | RGL4     | 0.00573275  | 0.011739811 | 0.050093819 | -0.463704601 |
| 1147 | NAE1     | 0.044901364 | 1.51E-05    | 0.242092486 | 0.367475815  |
| 1148 | PCNT     | 0.039052995 | 0.030570751 | 0.495614735 | -0.360312058 |
| 1149 | JAML     | 3.90E-05    | 0.013440769 | 0.770434074 | 0.744460315  |
| 1150 | LMNA     | 0.017200808 | 7.19E-07    | 0.346379943 | 0.429786891  |
| 1151 | ZNF394   | 0.022385392 | 3.26E-05    | 0.675975787 | 0.414461273  |
| 1152 | RECQL4   | 0.018540054 | 0.028205756 | NA          | -0.403928487 |
| 1153 | SQSTM1   | 0.003167066 | 0.003519533 | 0.201347762 | 0.523212104  |
| 1154 | MED11    | 0.033775961 | 0.008362499 | 0.872800169 | -0.36929622  |
| 1155 | SLC25A45 | 0.042611451 | 0.039862663 | 0.058534421 | -0.354758905 |
| 1156 | RPL29    | 0.006624708 | 1.02E-05    | 0.05715112  | -0.456828522 |
| 1157 | LAPTM5   | 1.58E-07    | 7.18E-08    | 0.495614735 | 0.984387649  |
| 1158 | TM2D1    | 0.001057414 | 0.011164406 | 0.196582302 | -0.542118227 |
| 1159 | ARPC5    | 0.004174957 | 0.030504685 | 0.970418458 | 0.510367324  |
| 1160 | BROX     | 0.010289344 | 0.034388888 | 0.286468882 | 0.457890994  |

|      |            |             |             |             |              |
|------|------------|-------------|-------------|-------------|--------------|
| 1161 | PPP1R21    | 8.34E-05    | 0.003000338 | 0.329691615 | -0.650353808 |
| 1162 | MAPKAPK2   | 0.037301212 | 0.013751976 | 0.111816902 | -0.36299647  |
| 1163 | CTSS       | 0.046612651 | 0.008204436 | 0.258994911 | 0.364636213  |
| 1164 | S100A11    | 0.007841014 | 0.000819802 | 0.469625518 | 0.474496136  |
| 1165 | S100A9     | 0.026341708 | 0.00814489  | 0.390994099 | 0.403552606  |
| 1166 | ATP1A1     | 0.02103229  | 0.003370686 | 0.640856102 | -0.396896732 |
| 1167 | ARPC2      | 2.21E-07    | 2.19E-07    | 0.058222899 | 0.95898835   |
| 1168 | TRAT1      | 0.003180102 | 0.023618453 | 0.157388245 | 0.522988906  |
| 1169 | PYHIN1     | 1.58E-07    | 0.000198699 | 0.051343337 | -0.865897334 |
| 1170 | TIPARP     | 0.012904078 | 0.033672527 | 0.696161836 | 0.443873887  |
| 1171 | U2SURP     | 0.012996717 | 0.019488737 | 0.892039609 | 0.443419242  |
| 1172 | CXCL3      | 0.003860583 | 0.001165361 | 0.266518941 | 0.513917197  |
| 1173 | RNF168     | 0.04037021  | 0.004764237 | 0.843362785 | 0.37505657   |
| 1174 | NDST3      | 0.002505681 | 0.005566963 | 0.741633972 | -0.502313139 |
| 1175 | NSA2       | 0.002621047 | 0.00270736  | 0.266518941 | -0.500083452 |
| 1176 | RPS14      | 0.004924531 | 0.001743125 | 0.062930152 | 0.500803357  |
| 1177 | ZNF704     | 0.039903447 | 0.021252565 | 0.495614735 | 0.375938232  |
| 1178 | OXR1       | 0.012220725 | 0.000752539 | 0.272763153 | -0.423462574 |
| 1179 | CARD19     | 0.014301465 | 0.000391749 | 0.208934182 | 0.440204288  |
| 1180 | STOML2     | 0.000546777 | 0.03174033  | 0.622236813 | -0.570895513 |
| 1181 | NEMF       | 0.024280285 | 0.001005362 | 0.20532134  | 0.409110698  |
| 1182 | ARF6       | 0.028129853 | 0.000333512 | 0.496281398 | 0.39909994   |
| 1183 | PRPF18     | 0.007146929 | 0.00574724  | 0.29320142  | -0.452600385 |
| 1184 | FUNDC2     | 0.00241118  | 0.004899709 | 0.608368235 | -0.504224488 |
| 1185 | CCDC186    | 0.048528029 | 0.020951804 | 0.843900867 | -0.34586722  |
| 1186 | TAF1D      | 0.002624929 | 0.004304984 | 0.461296732 | 0.53374159   |
| 1187 | BAG5       | 0.001834259 | 0.003357224 | 0.222822765 | -0.517037306 |
| 1188 | WBP1L      | 3.87E-05    | 0.00079204  | 0.080892424 | -0.680140069 |
| 1189 | HDGFL3     | 0.036923079 | 0.000141098 | 0.217626851 | 0.381053855  |
| 1190 | CPLX4      | 0.027788618 | 0.025092691 | 0.741633972 | -0.38076938  |
| 1191 | SLFN5      | 0.013536961 | 0.030484343 | 0.266518941 | -0.41972166  |
| 1192 | URM1       | 0.005347295 | 0.010271306 | 0.22158431  | -0.467130336 |
| 1193 | SP2        | 0.022722997 | 0.008526203 | 0.266518941 | 0.413520501  |
| 1194 | TUBA1A     | 0.000502651 | 2.00E-07    | 0.318270881 | 0.619790889  |
| 1195 | ZNF283     | 0.017876555 | 0.023112811 | 0.741633972 | -0.405533855 |
| 1196 | CD320      | 0.037427656 | 2.32E-05    | 0.117108898 | 0.380109078  |
| 1197 | SLC3A2     | 0.008463544 | 5.68E-05    | 0.367663188 | 0.469804431  |
| 1198 | LMBRD1     | 0.034680292 | 0.028201152 | 0.595105234 | 0.385451016  |
| 1199 | MMADHC     | 0.0120434   | 0.013176135 | 0.811850916 | 0.448203306  |
| 1200 | ATXN2L     | 0.003474654 | 0.026107546 | 0.125265592 | -0.486345408 |
| 1201 | SLC25A6    | 0.000914178 | 0.009487592 | 0.606753903 | 0.588374102  |
| 1202 | XPO6       | 0.017366612 | 0.01502551  | 0.488890137 | -0.407141236 |
| 1203 | AL669983.1 | 0.003763399 | 0.000467652 | 0.433814406 | 0.515419234  |

|      |            |             |             |             |              |
|------|------------|-------------|-------------|-------------|--------------|
| 1204 | NLGN1      | 0.014080898 | 0.003145922 | 0.640856102 | -0.417802198 |
| 1205 | ZPLD1      | 0.018540054 | 0.0311349   | NA          | -0.403928487 |
| 1206 | USP38      | 0.012548955 | 0.000770442 | 0.548029411 | -0.421976211 |
| 1207 | SLC16A5    | 0.045258412 | 0.031755331 | 0.268542367 | -0.350715027 |
| 1208 | PA2G4      | 0.013567231 | 0.024339563 | 0.750277184 | 0.443039594  |
| 1209 | PFKFB3     | 0.027746638 | 0.001763509 | 0.451402342 | 0.400045167  |
| 1210 | ARL6IP1    | 0.000868506 | 0.008497435 | 0.301250897 | 0.591194389  |
| 1211 | COMMD5     | 0.004637334 | 0.001786662 | 0.170037513 | -0.474106542 |
| 1212 | KIF5B      | 0.019227448 | 0.000685021 | 0.117108898 | 0.42332961   |
| 1213 | POLR1C     | 0.024277445 | 0.004472502 | 0.21513988  | 0.409119058  |
| 1214 | ZNF562     | 0.010553437 | 0.002790211 | 0.208421461 | -0.431439715 |
| 1215 | RPS21      | 0.000503314 | 7.16E-06    | 0.522904177 | 0.619700431  |
| 1216 | MRPL13     | 0.043667414 | 0.00308443  | 0.804104023 | 0.369526983  |
| 1217 | ID4        | 0.003645161 | 0.010995318 | NA          | -0.485096951 |
| 1218 | MRPL52     | 0.004628243 | 0.021823818 | 0.372208217 | -0.474220744 |
| 1219 | FAM71D     | 0.012772615 | 0.027295274 | 0.741633972 | -0.420931907 |
| 1220 | BNC2       | 0.03476706  | 0.041944631 | 0.741633972 | -0.367455896 |
| 1221 | ARV1       | 0.035296762 | 0.042562775 | 0.354896898 | -0.366438072 |
| 1222 | PPP1R14B   | 0.044542327 | 0.013596337 | 0.583257924 | 0.368097705  |
| 1223 | CHD2       | 7.39E-05    | 0.002297365 | 0.266518941 | 0.714124204  |
| 1224 | GNG5       | 0.031724544 | 0.021687621 | 0.519332821 | -0.373001377 |
| 1225 | PABPC5     | 0.04940714  | 0.000148038 | NA          | -0.344748493 |
| 1226 | YIF1A      | 0.024550123 | 0.001809538 | 0.224526959 | 0.408374216  |
| 1227 | NDUFA11    | 0.042025819 | 0.022223099 | 0.089123175 | -0.355638812 |
| 1228 | CADM2      | 0.006455337 | 0.006380869 | NA          | -0.458199112 |
| 1229 | EIF3F      | 0.000246228 | 0.007197307 | 0.299152207 | 0.654932891  |
| 1230 | B3GNTL1    | 0.046524525 | 7.16E-06    | 0.217626851 | 0.364762478  |
| 1231 | LYSMD3     | 0.038447794 | 0.002008071 | 0.346451476 | 0.378200888  |
| 1232 | CDC26      | 0.000738463 | 0.002980338 | 0.422355599 | -0.557518505 |
| 1233 | NAP1L4P1   | 0.013500947 | 0.004511507 | 0.072903683 | -0.419804079 |
| 1234 | DLGAP1-AS1 | 0.023277003 | 0.000448411 | 0.390994099 | 0.411943995  |
| 1235 | AC112247.1 | 0.006033994 | 0.011320744 | 0.606753903 | 0.489589007  |
| 1236 | IMP3       | 0.00927675  | 0.006694815 | 0.325056103 | 0.464201659  |
| 1237 | ODF3B      | 0.009612335 | 0.003785281 | 0.072903683 | -0.436603529 |
| 1238 | RPS3AP5    | 8.84E-07    | 6.57E-06    | 0.537590019 | 0.91179742   |
| 1239 | RPL10P16   | 0.00028502  | 0.01016106  | 0.573512337 | 0.647895938  |
| 1240 | CD28       | 0.024337163 | 0.002663492 | 0.640856102 | -0.388925943 |
| 1241 | SELENOW    | 0.021870242 | 0.021822556 | 0.163272879 | 0.415981756  |
| 1242 | RAD23A     | 0.000791017 | 0.003211076 | 0.787399171 | 0.596177908  |
| 1243 | GADD45GIP1 | 0.01204078  | 0.002979798 | 0.050353696 | 0.448218983  |
| 1244 | NPM1       | 1.58E-07    | 8.32E-07    | 0.1667774   | 1.039872678  |
| 1245 | SETD2      | 0.002631905 | 0.000213043 | 0.178775482 | 0.533583615  |
| 1246 | ZNF101     | 0.030697147 | 0.015693107 | 0.878152671 | 0.393734041  |

|      |            |             |             |             |              |
|------|------------|-------------|-------------|-------------|--------------|
| 1247 | IST1       | 0.021053942 | 0.000560846 | 0.36023221  | 0.417711937  |
| 1248 | TP53TG1    | 0.015222145 | 0.036372017 | 0.627257963 | -0.414314343 |
| 1249 | RPS17      | 0.000654441 | 0.001594598 | 0.592139104 | 0.606102748  |
| 1250 | ACBD3      | 0.033875702 | 0.011555034 | 0.664351063 | 0.387083644  |
| 1251 | AC005037.1 | 0.034189445 | 0.017296768 | 0.272763153 | -0.368549668 |
| 1252 | KIAA2026   | 0.040499306 | 0.019028853 | 0.744600001 | 0.374921425  |
| 1253 | EP400      | 0.031459788 | 0.002686603 | 0.188021702 | -0.373550526 |
| 1254 | NPIPA5     | 0.002754782 | 0.006892838 | 0.051517418 | -0.497573605 |
| 1255 | ACTG1      | 1.27E-05    | 1.16E-05    | 0.223802173 | 0.794965549  |
| 1256 | TOP1MT     | 0.038373588 | 0.023940571 | 0.081459189 | -0.361147212 |
| 1257 | PDE4B      | 0.012940439 | 4.49E-05    | 0.289211266 | 0.443695829  |
| 1258 | NOMO2      | 0.001162648 | 0.037401013 | 0.067415466 | -0.538028734 |
| 1259 | ZFP36L1    | 0.040423142 | 0.000698775 | 0.551177217 | 0.374961752  |
| 1260 | RPL12P4    | 0.000118679 | 0.000773408 | 0.362018283 | 0.691310279  |
| 1261 | IFITM1     | 0.004996875 | 7.57E-08    | 0.128104602 | 0.500313715  |
| 1262 | BLOC1S4    | 0.001750016 | 0.00335073  | 0.741633972 | -0.51915098  |
| 1263 | MKL2       | 0.024325895 | 0.005192829 | 0.067342337 | -0.388949328 |
| 1264 | KIAA1024L  | 0.003645161 | 0.002368324 | NA          | -0.485096951 |
| 1265 | SMYD4      | 0.049233824 | 0.018092124 | 0.733753027 | -0.344963562 |
| 1266 | LILRB4     | 0.028937062 | 0.030896157 | 0.495614735 | 0.397547209  |
| 1267 | RSBN1L     | 0.026969699 | 0.002754921 | 0.186452711 | -0.382556123 |
| 1268 | EXD3       | 0.037365128 | 0.04431923  | 0.214443009 | -0.362872741 |
| 1269 | ZKSCAN4    | 0.036324317 | 9.91E-05    | 0.072903683 | -0.364723385 |
| 1270 | TCEA1      | 0.020616501 | 0.028788737 | 0.73981283  | -0.397976827 |
| 1271 | ARL4C      | 0.001788681 | 0.026402409 | 0.303413829 | 0.554544568  |
| 1272 | H3F3C      | 1.58E-07    | 5.97E-06    | 0.080760042 | 1.0168579    |
| 1273 | PARVB      | 0.029060665 | 0.000532118 | 0.072903683 | -0.378375175 |
| 1274 | NDUFA4     | 6.32E-05    | 7.97E-06    | 0.144446353 | 0.721939308  |
| 1275 | ZKSCAN3    | 0.013500947 | 0.028521787 | 0.266518941 | -0.419804079 |
| 1276 | AC004448.1 | 0.011296004 | 0.003318904 | 0.812731715 | 0.452287454  |
| 1277 | HMGB1      | 0.001687362 | 0.002434992 | 0.143328262 | 0.557491177  |
| 1278 | TUBB       | 0.01423092  | 8.88E-07    | 0.217626851 | 0.440453824  |
| 1279 | ZNF493     | 0.042557509 | 0.00353171  | 0.062355251 | -0.35483708  |
| 1280 | NTNG2      | 0.044148696 | 0.028263903 | 0.085045933 | -0.352411293 |
| 1281 | TSC22D2    | 0.012627643 | 0.008748541 | 0.275061308 | 0.445269852  |
| 1282 | NACA       | 0.002169434 | 0.000458314 | 0.974772767 | 0.544303753  |
| 1283 | TRAPPC4    | 0.044826368 | 0.044698727 | 0.724448854 | -0.351357306 |
| 1284 | CD47       | 0.032623098 | 0.009268985 | 0.868746627 | 0.389469574  |
| 1285 | CASP4      | 0.034282558 | 0.019631966 | 0.781743581 | 0.386275596  |
| 1286 | MRPL21     | 0.041439777 | 0.043942509 | 0.44161036  | 0.37332258   |
| 1287 | C5orf56    | 0.002338994 | 0.003626174 | 0.459937004 | -0.505698718 |
| 1288 | GPX1P1     | 0.00112272  | 0.006357224 | 0.144446353 | -0.539407838 |
| 1289 | SERPINB2   | 0.032032037 | 0.031450711 | 0.495614735 | 0.390735514  |

|      |            |             |             |             |              |
|------|------------|-------------|-------------|-------------|--------------|
| 1290 | S100A10    | 0.014955842 | 5.09E-06    | 0.207733555 | 0.438096772  |
| 1291 | RPL37A     | 9.44E-06    | 0.000346441 | 0.980183068 | 0.807668122  |
| 1292 | OCLN       | 0.006497349 | 0.001331997 | 0.072903683 | -0.457879608 |
| 1293 | RPL12      | 0           | 8.83E-09    | 0.088411703 | 1.173746256  |
| 1294 | MBP        | 0.015386497 | 0.031261801 | 0.814358224 | -0.413737394 |
| 1295 | MRPL42     | 0.046574774 | 0.02006221  | 0.11842237  | -0.348707147 |
| 1296 | ENTPD7     | 0.008546777 | 0.003632407 | 0.495614735 | -0.443062005 |
| 1297 | SFI1       | 0.010767849 | 0.000512822 | 0.183812046 | -0.430412704 |
| 1298 | GFPT1      | 0.014360425 | 0.000130927 | 0.364352691 | -0.416838892 |
| 1299 | ZNF583     | 0.027155577 | 2.97E-05    | NA          | -0.382158195 |
| 1300 | YTHDF2     | 0.010126539 | 0.006080871 | 0.782767973 | 0.458798031  |
| 1301 | TLK1       | 0.020177009 | 0.012531396 | 0.640856102 | 0.420303707  |
| 1302 | STK39      | 0.026253961 | 0.002177498 | 0.089123175 | -0.384269936 |
| 1303 | MT-ND6     | 0.003085253 | 0.014215832 | 0.101299046 | -0.492040629 |
| 1304 | MTCO3P12   | 0.002513099 | 0.002966497 | 0.741633972 | 0.536216888  |
| 1305 | RPL10A     | 0.000273815 | 5.17E-05    | 0.164122963 | 0.649681816  |
| 1306 | CD247      | 0.02537788  | 0.006020958 | 0.280395706 | 0.406170066  |
| 1307 | HMG2       | 3.69E-05    | 1.22E-05    | 0.373142857 | 0.747239966  |
| 1308 | SELENOM    | 0.035599678 | 0.000424667 | 0.360967858 | 0.38354805   |
| 1309 | MT-ND3     | 1.58E-07    | 5.41E-10    | 0.092606224 | 0.992278137  |
| 1310 | KTI12      | 0.001254245 | 0.02806242  | 0.072903683 | -0.534332184 |
| 1311 | SELENOT    | 0.004134303 | 0.000936766 | 0.326788853 | 0.510973264  |
| 1312 | GRK5       | 0.011400322 | 2.31E-05    | 0.185027845 | 0.451692768  |
| 1313 | SMG5       | 0.006201787 | 0.000221474 | 0.217626851 | 0.488137208  |
| 1314 | SNORA72    | 0.015563538 | 0.005836816 | 0.072903683 | -0.413188028 |
| 1315 | FCGR3A     | 0.023472413 | 0.001414974 | 0.451402342 | 0.411453235  |
| 1316 | ARMCX7P    | 0.010172211 | 0.004692207 | 0.072903683 | -0.433503965 |
| 1317 | LSM2       | 0.017012846 | 0.035627789 | 0.192451268 | -0.408309776 |
| 1318 | AIF1       | 0.041099899 | 0.031872592 | 0.495614735 | 0.373924655  |
| 1319 | ZNF814     | 0.00083448  | 0.000147791 | 0.095895021 | -0.55178662  |
| 1320 | HLA-J      | 0.000677988 | 5.54E-09    | 0.279008003 | 0.604327118  |
| 1321 | HLA-G      | 0.00212515  | 0.001600961 | 0.981862874 | 0.545605661  |
| 1322 | LINC02397  | 0.013500947 | 0.002174692 | NA          | -0.419804079 |
| 1323 | SLC35B4    | 0.044498927 | 0.013862009 | 0.430064963 | -0.351882226 |
| 1324 | SNX2       | 0.04134821  | 0.004111214 | 0.640856102 | 0.373480254  |
| 1325 | SPDYE18    | 0.001311439 | 0.009665051 | 0.066533137 | -0.532301857 |
| 1326 | AC068533.1 | 0.01638757  | 0.011175615 | 0.091873155 | -0.410346537 |
| 1327 | KLRC2      | 0.037548482 | 0.000984021 | 0.346379943 | 0.379860933  |
| 1328 | AC068724.1 | 6.91E-06    | 4.89E-05    | 0.151116628 | 0.821627732  |
| 1329 | HLA-A      | 4.06E-05    | 8.70E-05    | 0.627257963 | 0.742554204  |
| 1330 | MT-TP      | 0.000879048 | 0.014332643 | 0.796112465 | 0.590573085  |
| 1331 | MIR320E    | 0.027814627 | 0.037089415 | 0.266518941 | -0.380713812 |
| 1332 | IGLV2-14   | 0.037041475 | 0.027599243 | 0.910213665 | 0.380824501  |

|      |            |             |             |             |              |
|------|------------|-------------|-------------|-------------|--------------|
| 1333 | TRBV9      | 0.034115176 | 4.42E-08    | 0.085045933 | 0.386639486  |
| 1334 | TRBV20-1   | 0.0071956   | 5.60E-07    | 0.072903683 | -0.452208256 |
| 1335 | TRBJ2-1    | 0.00161546  | 0.001145912 | 0.606753903 | 0.559787511  |
| 1336 | TRBJ2-2    | 0.033710719 | 0.040077855 | 0.989840835 | 0.387413666  |
| 1337 | TRBC2      | 6.53E-06    | 0.001951013 | 0.627257963 | 0.824373791  |
| 1338 | TRAV20     | 0.000256044 | 5.02E-10    | 0.627257963 | -0.603009825 |
| 1339 | TRAV22     | 0.003356796 | 1.37E-07    | 0.266518941 | -0.487975889 |
| 1340 | TRAJ29     | 0.000231677 | 3.52E-07    | NA          | -0.607189278 |
| 1341 | TRAJ24     | 0.023750647 | 0.001422063 | NA          | -0.39045835  |
| 1342 | TRAJ23     | 0.008868979 | 0.00302848  | 0.266518941 | 0.467008306  |
| 1343 | SNORA3B    | 0.025143772 | 0.035021488 | 0.627257963 | -0.386970263 |
| 1344 | ZRSR1      | 0.024902626 | 0.015051187 | 0.266518941 | -0.387531095 |
| 1345 | ST13P5     | 0.024101635 | 0.028871449 | 0.42897246  | 0.409608813  |
| 1346 | RPL15P3    | 0.011127991 | 0.007038605 | 0.970478149 | 0.453229595  |
| 1347 | YWHAZP4    | 0.014119595 | 0.037694335 | 0.189848755 | -0.41766633  |
| 1348 | CRIP1      | 0.005500789 | 0.003977238 | 0.053056997 | -0.465785056 |
| 1349 | EEF1B2P6   | 0.044423363 | 0.020907414 | 0.974471964 | 0.368294836  |
| 1350 | AL513043.1 | 0.006807146 | 0.000588287 | 0.13728178  | 0.483142366  |
| 1351 | RPS7P11    | 0.008954454 | 0.011861061 | 0.925380722 | 0.466455776  |
| 1352 | NPM1P50    | 0.003556594 | 0.0003598   | 0.403610134 | 0.51688738   |
| 1353 | FTH1P3     | 0.00150464  | 0.001979846 | 0.186714706 | 0.563368725  |
| 1354 | HMGB1P37   | 0.007091282 | 1.64E-05    | 0.678777108 | 0.480549341  |
| 1355 | RPLPOP6    | 9.73E-05    | 2.46E-07    | 0.410623216 | 0.701677813  |
| 1356 | AC020898.1 | 0.000141531 | 6.63E-06    | 0.266518941 | 0.682326549  |
| 1357 | ACTBP2     | 1.58E-07    | 1.92E-11    | 0.661464352 | 1.010518275  |
| 1358 | RPL13AP7   | 0.006841961 | 0.004034499 | 0.27362845  | 0.482802925  |
| 1359 | NPM1P33    | 0.010349568 | 0.003151226 | 0.390994099 | 0.457526107  |
| 1360 | NUDT19     | 0.009136134 | 3.67E-07    | 0.164095994 | 0.465198505  |
| 1361 | PTMAP5     | 0.001136323 | 0.00096255  | 0.212119692 | 0.578443771  |
| 1362 | TUBBP2     | 0.010462408 | 0.004706718 | 0.266518941 | 0.456837259  |
| 1363 | RPS3AP26   | 7.26E-07    | 1.99E-05    | 0.068766349 | 0.916241608  |
| 1364 | TUBAP2     | 0.002908339 | 2.47E-06    | 0.224940076 | 0.527986838  |
| 1365 | RPL7P1     | 0.010962565 | 0.005304604 | 0.325470223 | 0.453958469  |
| 1366 | AC010468.1 | 3.95E-06    | 4.73E-05    | 0.268542367 | 0.845200919  |
| 1367 | DNAJA1P3   | 0.02335203  | 0.004964132 | 0.596346602 | 0.411742475  |
| 1368 | DSTNP4     | 0.03568329  | 0.028586276 | 0.495614735 | 0.383414814  |
| 1369 | NPM1P24    | 0.010651253 | 0.043653657 | 0.707104349 | 0.455788917  |
| 1370 | EEF1A1P29  | 0.001975412 | 0.000924396 | 0.508870182 | 0.549481653  |
| 1371 | NPM1P12    | 0.01569055  | 0.002198782 | 0.451402342 | 0.435422146  |
| 1372 | ZNF407     | 0.044193043 | 0.020280892 | 0.218910677 | 0.368669483  |
| 1373 | CALM2P3    | 0.002289344 | 0.000323041 | 0.30992647  | 0.541418548  |
| 1374 | AL596087.1 | 0.000302348 | 2.50E-07    | 0.550194556 | 0.644864168  |
| 1375 | AL354702.1 | 5.69E-05    | 6.78E-05    | 0.627257963 | 0.726587252  |

|      |            |             |             |             |              |
|------|------------|-------------|-------------|-------------|--------------|
| 1376 | RPS4XP7    | 0.005639985 | 0.007147111 | 0.466620039 | 0.493482302  |
| 1377 | AL590867.2 | 0.029130074 | 0.002744825 | 0.915610901 | 0.397179561  |
| 1378 | GSTM2P1    | 0.013500947 | 0.02270988  | 0.266518941 | -0.419804079 |
| 1379 | FTH1P8     | 0.0001088   | 0.000463848 | 0.309718913 | 0.696132001  |
| 1380 | ZNF259P1   | 0.019967521 | 0.017054271 | 0.451402342 | 0.420943078  |
| 1381 | AL133260.1 | 0.000229058 | 0.000184757 | 0.095904811 | 0.658543138  |
| 1382 | AL161787.1 | 0.000282968 | 1.26E-07    | 0.741633972 | 0.648153932  |
| 1383 | VAMP2      | 0.004470835 | 0.005432804 | 0.252519638 | -0.476025596 |
| 1384 | TTC4P1     | 0.018540054 | 0.031174348 | 0.266518941 | -0.403928487 |
| 1385 | RNU6-757P  | 0.04822669  | 0.002996031 | 0.266518941 | -0.346290588 |
| 1386 | SNORD63B   | 0.010933969 | 0.019980997 | 0.072903683 | -0.429533514 |
| 1387 | TMSB4XP4   | 0.000130989 | 0.00527916  | 0.529643804 | 0.686524683  |
| 1388 | TINCR      | 0.003645161 | 0.011050501 | 0.266518941 | -0.485096951 |
| 1389 | NSUN5P1    | 0.000685342 | 0.040852256 | 0.59333389  | -0.560906516 |
| 1390 | RPS20P14   | 0.046632346 | 0.02340395  | 0.825730405 | 0.364600555  |
| 1391 | DNAJC27-AS | 0.018540054 | 0.028444043 | 0.072903683 | -0.403928487 |
| 1392 | HAUS1P2    | 0.013500947 | 0.009747979 | 0.266518941 | -0.419804079 |
| 1393 | AC108043.1 | 0.03122789  | 0.012628325 | 0.627257963 | 0.392501858  |
| 1394 | RPS27AP16  | 2.98E-05    | 0.000192471 | 0.582429053 | 0.757966747  |
| 1395 | AC015987.1 | 0.007479578 | 0.003631004 | 0.085045933 | -0.450180283 |
| 1396 | RPS4XP16   | 0.001284325 | 0.003472445 | 0.551177217 | 0.571943349  |
| 1397 | RPL3P7     | 0.011818414 | 0.008793793 | 0.565641658 | 0.449407554  |
| 1398 | RPSAP58    | 0.000147907 | 0.000823047 | 0.551177217 | 0.679910114  |
| 1399 | ST13P6     | 0.004766429 | 0.001198301 | 0.42897246  | 0.502761891  |
| 1400 | RPL35P5    | 0.002823275 | 0.032671465 | 0.257160438 | 0.529624515  |
| 1401 | ZNF469     | 0.013500947 | 0.030768553 | NA          | -0.419804079 |
| 1402 | AL138785.1 | 0.004596774 | 0.000627601 | 0.741633972 | 0.504825254  |
| 1403 | MTND2P28   | 0.001537056 | 8.24E-05    | 0.102866991 | 0.562287363  |
| 1404 | NPM1P18    | 0.014925036 | 0.010451049 | 0.451402342 | 0.438236418  |
| 1405 | GTF2H2B    | 0.022557414 | 0.002120643 | 0.268542367 | -0.393462556 |
| 1406 | SLC25A5P5  | 0.015358847 | 0.000465198 | 0.531968206 | 0.436599608  |
| 1407 | HMG2P7     | 0.013500947 | 0.024616808 | NA          | -0.419804079 |
| 1408 | FTH1P20    | 0.022394167 | 0.044834945 | 0.431863777 | 0.414432753  |
| 1409 | FTLP3      | 8.89E-05    | 3.69E-07    | 0.627257963 | 0.70559306   |
| 1410 | LINC01709  | 0.036357458 | 0.047646264 | 0.766725642 | 0.382202632  |
| 1411 | TMEM256P2  | 0.002254624 | 0.000154586 | 0.201474106 | 0.542233147  |
| 1412 | DANCR      | 0.002076037 | 0.000159633 | 0.172774615 | 0.546822674  |
| 1413 | AC005912.1 | 0.000124897 | 0.000613931 | 0.174670093 | 0.68876746   |
| 1414 | RPL23AP43  | 0.004561139 | 0.001113037 | 0.475311291 | 0.505294742  |
| 1415 | PSME2P6    | 0.00848526  | 0.00412439  | 0.086324584 | -0.443468734 |
| 1416 | LTB        | 0.024834859 | 5.40E-05    | 0.07193637  | 0.407563941  |
| 1417 | RPL7P6     | 0.036965217 | 0.000222867 | 0.165158554 | 0.380960192  |
| 1418 | HNRNPA1P1  | 0.02402746  | 0.039760818 | 0.537590019 | 0.409823498  |



|      |            |             |             |             |              |
|------|------------|-------------|-------------|-------------|--------------|
| 1419 | AP000282.1 | 0.006455337 | 0.010995318 | NA          | -0.458199112 |
| 1420 | RPL3P2     | 6.39E-05    | 0.001074153 | 0.542862618 | 0.721549946  |
| 1421 | HLA-U      | 4.40E-05    | 5.26E-08    | 0.135531461 | 0.738770206  |
| 1422 | AC007952.2 | 0.039791617 | 0.047844239 | 0.266518941 | -0.359034581 |
| 1423 | ORM2       | 0.048011237 | 0.004843915 | 0.072903683 | -0.346596849 |
| 1424 | FTLP17     | 0.019746418 | 0.044475259 | 0.227312231 | -0.400394853 |
| 1425 | AL109741.2 | 0.007814658 | 0.002837965 | 0.537590019 | 0.474702127  |
| 1426 | RPS19P7    | 0.017339183 | 0.018147497 | 0.814999037 | 0.429269243  |
| 1427 | OST4       | 0.003252541 | 0.00016654  | 0.656503557 | 0.521869314  |
| 1428 | RPL15P18   | 0.010950066 | 0.005538007 | 0.072903683 | -0.429447756 |
| 1429 | EEF1A1P11  | 3.79E-07    | 1.15E-05    | 0.266518941 | 0.940317064  |
| 1430 | AF013593.1 | 0.013500947 | 0.024242576 | 0.072903683 | -0.419804079 |
| 1431 | RPS13P2    | 0.016806388 | 0.013464649 | 0.616041698 | 0.431251099  |
| 1432 | UBE3AP2    | 0.022426962 | 0.008211954 | 0.451402342 | 0.414349481  |
| 1433 | AC006483.1 | 0.000494539 | 0.000402675 | 0.255008281 | 0.620640355  |
| 1434 | SEPT7P8    | 0.004688877 | 0.002251284 | 0.346379943 | 0.50372718   |
| 1435 | CALM2P2    | 6.73E-05    | 1.86E-05    | 0.650179016 | 0.719010634  |
| 1436 | AC026403.1 | 4.10E-07    | 1.13E-07    | 0.236540689 | 0.93656126   |
| 1437 | ACTBP1     | 0.038773278 | 0.030780064 | 0.268542367 | -0.360790788 |
| 1438 | RPL4P4     | 0.007656745 | 0.038009042 | 0.970478149 | 0.475979212  |
| 1439 | AL359837.1 | 0.038773278 | 0.019830347 | 0.088593586 | -0.360790788 |
| 1440 | PYHIN5P    | 0.018362666 | 0.042170621 | 0.222822765 | -0.404072504 |
| 1441 | TRBV5-4    | 0.030999179 | 0.001104709 | 0.390994099 | 0.392998663  |
| 1442 | AC021016.1 | 0.011413547 | 0.012958388 | 0.21339583  | 0.45161238   |
| 1443 | RPS23P8    | 0.002514204 | 0.008846995 | 0.765295314 | 0.536196789  |
| 1444 | FBXW4P1    | 0.00497355  | 0.003821418 | 0.072903683 | -0.470793716 |
| 1445 | SRGAP2-AS1 | 0.04780803  | 0.005664443 | 0.072903683 | -0.346904646 |
| 1446 | AC079250.1 | 0.031000537 | 0.001022335 | 0.82591456  | 0.392995156  |
| 1447 | LINC00326  | 0.00497355  | 0.000455786 | NA          | -0.470793716 |
| 1448 | RSL24D1P11 | 0.014925036 | 0.013227679 | 0.451402342 | 0.438236418  |
| 1449 | LINC01037  | 0.00041017  | 0.000595373 | NA          | -0.583606799 |
| 1450 | ST13P4     | 0.025999653 | 0.005835701 | 0.296544194 | 0.404516987  |
| 1451 | FTH1P7     | 0.00150524  | 0.00454988  | 0.326913791 | 0.563353815  |
| 1452 | FTLP2      | 0.003297014 | 0.002275806 | 0.427934775 | 0.52105404   |
| 1453 | RPL3P4     | 0.002936904 | 6.69E-05    | 0.219102353 | 0.527493972  |
| 1454 | RPL34P27   | 0.001120889 | 0.003278784 | 0.156954969 | 0.579040724  |
| 1455 | AL592463.1 | 0.016550881 | 0.002531106 | 0.296544194 | 0.432088498  |
| 1456 | EEF1A1P14  | 0.049980273 | 0.016659853 | 0.796837466 | 0.359605827  |
| 1457 | WTH3DI     | 0.000638091 | 0.029736258 | 0.252680775 | -0.563982524 |
| 1458 | ERP29P1    | 0.007957231 | 0.001219711 | 0.627257963 | 0.473617656  |
| 1459 | EEF1A1P6   | 7.73E-06    | 0.000668487 | 0.268542367 | 0.815763664  |
| 1460 | AC007969.1 | 0.000146582 | 0.0080624   | 0.706047676 | 0.680371798  |
| 1461 | RPL7P44    | 0.00381671  | 0.002547816 | 0.296544194 | 0.514583981  |

|      |            |             |             |             |              |
|------|------------|-------------|-------------|-------------|--------------|
| 1462 | RPL10P9    | 0.004194053 | 0.014376854 | 0.741633972 | 0.510099058  |
| 1463 | RPL13AP6   | 0.005916546 | 0.00084319  | 0.551177217 | 0.49078292   |
| 1464 | RPS4XP11   | 0.03857752  | 0.028372807 | 0.741633972 | 0.377974156  |
| 1465 | RPL13AP20  | 4.50E-05    | 0.000323211 | 0.166887518 | 0.737590879  |
| 1466 | AC125807.1 | 0.000761063 | 0.006873909 | 0.500203476 | 0.598258974  |
| 1467 | MAPKAPK5-A | 0.02686374  | 0.044443287 | 0.05719694  | -0.382801139 |
| 1468 | AL162151.2 | 0.04519014  | 0.006261617 | 0.653178705 | 0.367009622  |
| 1469 | HMG2P5     | 0.039491699 | 0.049111112 | 0.976013851 | 0.37658461   |
| 1470 | EEF1GP5    | 0.000492646 | 2.92E-05    | 0.272763153 | 0.620866486  |
| 1471 | RPS3AP6    | 0.000430844 | 0.00971257  | 0.495614735 | 0.627724453  |
| 1472 | IQCM       | 0.013500947 | 0.001643395 | NA          | -0.419804079 |
| 1473 | FTH1P2     | 4.72E-05    | 0.000134135 | 0.196121288 | 0.735124096  |
| 1474 | RPL26P37   | 0.024891674 | 0.000790879 | 0.451402342 | 0.40742401   |
| 1475 | AC006463.2 | 0.02304804  | 0.002909571 | 0.187865469 | -0.39223319  |
| 1476 | HIPK1-AS1  | 0.032882583 | 0.022546557 | 0.741633972 | -0.370921309 |
| 1477 | AC000089.1 | 0.000814911 | 0.000396387 | 0.432539598 | 0.594556179  |
| 1478 | AC239859.3 | 0.028289218 | 0.007980193 | 0.072903683 | -0.379690404 |
| 1479 | AL031729.1 | 0.006279149 | 0.003626997 | 0.266518941 | 0.48743767   |
| 1480 | RPL17P36   | 0.026092829 | 0.018850302 | 0.824147475 | 0.40424033   |
| 1481 | RPL23AP37  | 0.001355628 | 0.004161064 | 0.461296732 | 0.568958876  |
| 1482 | RPL34P34   | 0.039178998 | 0.046725281 | 0.391148469 | 0.377200173  |
| 1483 | RPL13AP5   | 0.001197841 | 0.001637733 | 0.66620453  | 0.57566901   |
| 1484 | AC116049.1 | 4.55E-05    | 0.016838857 | 0.06126599  | -0.673593386 |
| 1485 | AL356000.1 | 0.018960072 | 0.005593539 | 0.064179293 | -0.402703354 |
| 1486 | RPL19P16   | 0.026649675 | 0.000489829 | 0.985641109 | 0.402753937  |
| 1487 | TMSB4XP1   | 0.000321444 | 0.001099192 | 0.385775233 | 0.642385239  |
| 1488 | AL732372.2 | 0.035952086 | 0.021587208 | 0.266518941 | -0.365368024 |
| 1489 | AL080243.2 | 0.010528313 | 0.000916251 | 0.852451873 | 0.456416345  |
| 1490 | FTH1P11    | 0.00069601  | 1.95E-07    | 0.31428651  | 0.60311416   |
| 1491 | RPL30P4    | 0.00286658  | 3.96E-05    | 0.640856102 | 0.528763887  |
| 1492 | AC079922.2 | 0.006455337 | 0.009857798 | NA          | -0.458199112 |
| 1493 | HNRNPA1P3  | 0.01598668  | 0.001058774 | 0.602866515 | 0.43422869   |
| 1494 | RPS3AP29   | 0.001788397 | 0.000634338 | 0.242819618 | 0.554555957  |
| 1495 | FAM21FP    | 0.047533331 | 0.006243264 | 0.218249348 | -0.347283973 |
| 1496 | RPL9P7     | 0.001681049 | 0.011003384 | 0.627257963 | 0.557694924  |
| 1497 | Z95327.2   | 0.03208437  | 0.035598028 | 0.495614735 | -0.372317571 |
| 1498 | AL133477.1 | 0.009812922 | 0.029070253 | 0.268542367 | -0.435457229 |
| 1499 | AC026254.2 | 0.021803863 | 0.025103836 | 0.644840693 | 0.416118568  |
| 1500 | AC004865.2 | 0.011298529 | 0.004754371 | 0.266518941 | -0.427879258 |
| 1501 | APOBEC3G   | 1.64E-05    | 0.003994151 | 0.766525253 | 0.783353215  |
| 1502 | AC004890.1 | 0.049754782 | 0.028554219 | 0.495614735 | 0.359909984  |
| 1503 | AC104563.1 | 0.007042453 | 4.17E-05    | 0.978963955 | 0.481007867  |
| 1504 | AC069431.1 | 0.006455337 | 0.003192386 | NA          | -0.458199112 |

|      |            |             |             |             |              |
|------|------------|-------------|-------------|-------------|--------------|
| 1505 | PSMB9      | 0.012035667 | 0.00025189  | 0.255008281 | 0.448250025  |
| 1506 | RPSAP12    | 0.002019033 | 1.39E-06    | 0.640856102 | 0.548349203  |
| 1507 | AC114876.1 | 0.017383088 | 0.024837147 | 0.439182373 | 0.429080005  |
| 1508 | ERICH6-AS1 | 0.03237908  | 0.000272042 | 0.248517793 | 0.389983923  |
| 1509 | AC090255.1 | 0.013500947 | 0.030372889 | 0.266518941 | -0.419804079 |
| 1510 | RPL29P2    | 0.013500947 | 0.019257069 | 0.072903683 | -0.419804079 |
| 1511 | AP001024.1 | 0.008449688 | 0.042454415 | 0.27219569  | 0.469905915  |
| 1512 | AL121612.1 | 0.018012878 | 0.000452169 | 0.495614735 | 0.426923727  |
| 1513 | SEPT7P6    | 0.015384824 | 0.006464105 | 0.913191015 | 0.436501319  |
| 1514 | AC104619.1 | 0.002359384 | 0.004573774 | 0.217626851 | 0.539776833  |
| 1515 | ARPC4      | 0.000167351 | 0.028890599 | 0.746675535 | 0.673579553  |
| 1516 | RPL7AP30   | 0.039224134 | 0.001014936 | 0.847338294 | 0.377107654  |
| 1517 | PLEKHO2    | 0.039652579 | 0.024903647 | 0.097607019 | -0.359265355 |
| 1518 | RPL14P3    | 0.001886971 | 0.001050014 | 0.406000202 | 0.551719077  |
| 1519 | RPS3AP49   | 2.32E-05    | 6.08E-06    | 0.13728178  | 0.768402211  |
| 1520 | RPL7AP11   | 0.022054416 | 0.016418811 | 0.378729945 | 0.415417391  |
| 1521 | RPS3AP43   | 0.030467742 | 0.02993674  | 0.495614735 | 0.394267821  |
| 1522 | RPS27AP1   | 0.003148223 | 0.004365384 | 0.479286388 | 0.523550947  |
| 1523 | SOX2-OT    | 0.006872956 | 0.000513887 | NA          | -0.454839791 |
| 1524 | FTH1P23    | 0.010811439 | 0.020371069 | 0.536744974 | 0.454836065  |
| 1525 | AC010285.1 | 0.001932264 | 0.00135901  | NA          | -0.514809611 |
| 1526 | RN7SL55P   | 0.042675178 | 0.01060721  | 0.266518941 | -0.354660959 |
| 1527 | RN7SL174P  | 0.039747491 | 0.010004654 | 0.072903683 | -0.359106621 |
| 1528 | AC024940.2 | 0.002899312 | 0.000377217 | 0.684223648 | 0.528134717  |
| 1529 | EEF1A1P10  | 0.00618086  | 7.86E-06    | 0.551177217 | 0.488331003  |
| 1530 | RPL23AP65  | 0.005520706 | 0.000661414 | 0.185258892 | 0.494674404  |
| 1531 | AC110749.1 | 0.023387412 | 0.00888065  | 0.451402342 | 0.41164999   |
| 1532 | DUXAP10    | 0.030792059 | 0.048227351 | 0.072903683 | -0.374951091 |
| 1533 | RPL7P23    | 0.004362193 | 6.62E-07    | 0.346379943 | 0.50788752   |
| 1534 | AC116533.1 | 0.015902468 | 6.25E-05    | 0.584991546 | 0.434563517  |
| 1535 | OR2A1-AS1  | 0.049284073 | 0.048198152 | 0.741633972 | -0.344902771 |
| 1536 | ASLP1      | 0.01085124  | 0.014393016 | 0.35100731  | -0.429957261 |
| 1537 | EEF1A1P4   | 1.01E-05    | 0.000340195 | 0.347602935 | 0.805129465  |
| 1538 | AC087521.2 | 0.020672432 | 0.025162858 | NA          | -0.397839688 |
| 1539 | PCED1B-AS1 | 0.000868316 | 1.84E-07    | 0.824279536 | 0.591205306  |
| 1540 | SERBP1P6   | 0.041011331 | 0.0416422   | 0.433814406 | 0.37401118   |
| 1541 | MTND5P11   | 0.007561328 | 2.66E-06    | 0.480066535 | 0.476634996  |
| 1542 | MTND6P4    | 0.00988858  | 0.030247856 | 0.669382467 | 0.460249517  |
| 1543 | EEF1A1P9   | 1.58E-07    | 1.59E-07    | 0.094875875 | 0.977054576  |
| 1544 | NPM1P27    | 0.014328672 | 0.049034156 | 0.741633972 | 0.440081546  |
| 1545 | AC106864.1 | 0.047363392 | 0.030851179 | 0.266518941 | -0.347553972 |
| 1546 | RAC1P2     | 0.029227732 | 0.021125614 | 0.670444016 | 0.396924227  |
| 1547 | AC104619.3 | 1.39E-06    | 1.59E-05    | 0.522904177 | 0.88942833   |

|      |            |             |             |             |              |
|------|------------|-------------|-------------|-------------|--------------|
| 1548 | EEF1A1P13  | 3.16E-08    | 7.03E-07    | 0.052222896 | 1.109140035  |
| 1549 | SMAD1-AS2  | 0.024620731 | 0.00099576  | 0.266518941 | -0.388221017 |
| 1550 | GAPDHP35   | 5.99E-05    | 3.29E-08    | 0.082180077 | 0.724505832  |
| 1551 | AC136475.1 | 0.031876491 | 0.001152064 | 0.072903683 | -0.372714169 |
| 1552 | RNU7-181P  | 0.000988921 | 0.04820464  | 0.214443009 | -0.543954996 |
| 1553 | AC027309.2 | 0.000479073 | 0.001750485 | 0.629651274 | 0.622226015  |
| 1554 | MYL12AP1   | 0.049743514 | 0.01107994  | 0.312547609 | 0.359916405  |
| 1555 | AP001000.1 | 0.003797203 | 0.001318615 | 0.7512648   | 0.514883416  |
| 1556 | PKD1P5     | 0.008056089 | 0.00772209  | 0.072903683 | -0.446294262 |
| 1557 | HNRNPCP8   | 0.018540054 | 0.031504751 | NA          | -0.403928487 |
| 1558 | ARL6IP1P3  | 0.013500947 | 0.023338048 | 0.072903683 | -0.419804079 |
| 1559 | SDHCP4     | 0.033632978 | 0.016388903 | 0.495614735 | -0.369540099 |
| 1560 | CHMP1B     | 0.028030964 | 0.040145636 | 0.859066663 | 0.399322858  |
| 1561 | EID1       | 0.002319203 | 0.006381257 | 0.495614735 | 0.540711455  |
| 1562 | TRAV1-1    | 0.013961429 | 0.000173917 | 0.248517793 | 0.441522398  |
| 1563 | AC092862.1 | 0.042779717 | 0.004031668 | 0.800165229 | 0.371037464  |
| 1564 | MTRNR2L8   | 0.00280036  | 1.77E-07    | 0.495614735 | 0.530069727  |
| 1565 | PDCD5P1    | 0.011935389 | 0.019841339 | 0.231997842 | 0.448772591  |
| 1566 | AC117500.3 | 0.046575406 | 0.003300063 | 0.268542367 | -0.348705907 |
| 1567 | LINC00944  | 0.033253677 | 0.013487723 | 0.266518941 | -0.370218224 |
| 1568 | AL136418.1 | 0.019482545 | 0.0168698   | 0.266518941 | -0.401084117 |
| 1569 | NOP56P3    | 0.015988069 | 0.030780064 | 0.085045933 | -0.411700168 |
| 1570 | HIGD1AP1   | 0.035973897 | 0.006294236 | 0.213355276 | -0.365325816 |
| 1571 | AC008126.1 | 0.002674736 | 0.002153144 | 0.461423041 | 0.532627979  |
| 1572 | AC090680.2 | 0.006172653 | 0.002644933 | NA          | -0.460038506 |
| 1573 | AC023161.2 | 0.004995834 | 0.002723527 | 0.072903683 | -0.470585502 |
| 1574 | AC025431.1 | 0.00506297  | 0.003318842 | NA          | -0.469933255 |
| 1575 | AC022306.1 | 0.028260874 | 0.025431195 | 0.272763153 | -0.379735251 |
| 1576 | AC015712.2 | 0.013500947 | 0.028742573 | 0.266518941 | -0.419804079 |
| 1577 | EEF1A1P22  | 0.002500726 | 9.09E-06    | 0.648757413 | 0.53649407   |
| 1578 | AC111152.3 | 0.00054965  | 0.009577972 | 0.214443009 | -0.570623891 |
| 1579 | AC106028.3 | 0.003645161 | 0.010542758 | NA          | -0.485096951 |
| 1580 | AC099786.3 | 0.006455337 | 0.000918945 | NA          | -0.458199112 |
| 1581 | AC002551.1 | 0.048770122 | 0.005956411 | 0.072903683 | -0.345566217 |
| 1582 | AC090079.1 | 6.37E-05    | 9.37E-06    | NA          | -0.66082109  |
| 1583 | TXNP4      | 0.001425668 | 0.000709635 | 0.248517793 | 0.566248966  |
| 1584 | AC068152.1 | 0.049727637 | 0.039852562 | 0.075542654 | -0.344361047 |
| 1585 | RPS7P1     | 0.003032574 | 6.88E-05    | 0.726203401 | 0.52571034   |
| 1586 | TIMM23     | 0.036933558 | 0.003413483 | 0.971309462 | 0.381028638  |
| 1587 | AC091042.1 | 0.023370747 | 0.017751578 | 0.373142857 | 0.411695093  |
| 1588 | AC025198.1 | 0.025937378 | 0.032545116 | 0.266518941 | 0.404692457  |
| 1589 | EIF1P5     | 0.037044189 | 0.004903082 | 0.664392091 | 0.38081832   |
| 1590 | AC093227.2 | 0.020681649 | 0.00918101  | 0.390994099 | 0.418809067  |

|      |            |             |             |             |              |
|------|------------|-------------|-------------|-------------|--------------|
| 1591 | AC022706.1 | 0.037642036 | 0.018243578 | 0.98312801  | -0.362362398 |
| 1592 | MTCO2P2    | 5.93E-05    | 0.000302506 | 0.166432283 | 0.72483112   |
| 1593 | AC007229.1 | 0.013500947 | 0.007414423 | 0.266518941 | -0.419804079 |
| 1594 | AL158827.2 | 0.00760659  | 0.008753164 | 0.390994099 | 0.476270281  |
| 1595 | AL049840.2 | 0.024165362 | 0.009535826 | 0.072903683 | -0.389372936 |
| 1596 | AC027020.2 | 0.033632978 | 0.046668393 | 0.495614735 | -0.369540099 |
| 1597 | MTCO2P22   | 0.00436939  | 0.000997711 | 0.972376871 | 0.507808859  |
| 1598 | YTHDF2P1   | 0.009470488 | 0.000657661 | 0.296544194 | 0.462999198  |
| 1599 | CCL5       | 5.21E-06    | 0.000204384 | 0.627257963 | 0.832754681  |
| 1600 | ATP2B1-AS1 | 0.031969667 | 0.030583619 | 0.495614735 | 0.390864863  |
| 1601 | SNORD14A   | 0.023040023 | 0.002563666 | 0.296544194 | 0.412627151  |
| 1602 | GTF2IP20   | 0.001470078 | 0.009649374 | 0.247765574 | -0.526957929 |
| 1603 | AL592148.3 | 0.035952086 | 0.027535729 | 0.266518941 | -0.365368024 |
| 1604 | LINC01578  | 0.007706332 | 0.02999981  | 0.970418458 | 0.475569113  |
| 1605 | AP000254.1 | 0.041457105 | 0.041358815 | 0.266518941 | 0.373291427  |
| 1606 | AL157392.4 | 0.016397008 | 0.010901936 | 0.072903683 | -0.410320448 |
| 1607 | TAF9       | 0.038878732 | 0.000286994 | 0.372557085 | 0.377747105  |
| 1608 | LINC01138  | 0.038870621 | 0.016952516 | 0.627257963 | 0.37776194   |
| 1609 | AC103691.1 | 0.036364592 | 0.020625254 | 0.072903683 | -0.364657409 |
| 1610 | AC005332.6 | 0.038088315 | 9.89E-08    | 0.119736454 | 0.378809468  |
| 1611 | AC002553.4 | 0.043293069 | 0.011642966 | 0.085045933 | -0.353696787 |
| 1612 | VN1R7P     | 0.003645161 | 0.007213019 | NA          | -0.485096951 |
| 1613 | AC244472.2 | 3.20E-05    | 1.60E-10    | 0.266518941 | -0.688466908 |
| 1614 | AC073534.2 | 0.045515245 | 0.03017839  | 0.741633972 | -0.350312762 |
| 1615 | HIST1H4I   | 0.021669686 | 0.006807535 | 0.072903683 | -0.395759636 |
| 1616 | RBBP4P3    | 0.021669686 | 0.028410889 | 0.072903683 | -0.395759636 |
| 1617 | TRAC       | 0.001481851 | 0.013618598 | 0.11497617  | -0.526566858 |
| 1618 | PSMB3      | 0.002936904 | 0.002796023 | 0.640856102 | 0.527494176  |
| 1619 | TRAJ37     | 0.046621141 | 0.005838133 | 0.248517793 | 0.364621149  |
| 1620 | AL358852.1 | 0.019827378 | 0.020591621 | 0.222822765 | -0.400154718 |
| 1621 | CR381670.1 | 0.040735875 | 0.030082395 | NA          | -0.357665117 |
| 1622 | AC138305.3 | 0.005057256 | 0.01081295  | 0.199355334 | 0.499633297  |
| 1623 | LINC00216  | 0.043957421 | 0.008002057 | NA          | -0.35268428  |
| 1624 | LINC02033  | 0.012117669 | 0.001193074 | NA          | -0.423928704 |
| 1625 | AC013394.1 | 0.044468594 | 0.031187046 | 0.072903683 | -0.351929538 |
| 1626 | AC006511.3 | 0.002849031 | 2.61E-06    | 0.266518941 | 0.529121337  |
| 1627 | AL353597.3 | 0.014756234 | 2.31E-05    | 0.266518941 | -0.415892237 |
| 1628 | AC008895.1 | 0.013892021 | 0.01957068  | 0.266518941 | -0.418517166 |
| 1629 | TBC1D22A-A | 0.033291838 | 0.027737825 | 0.266518941 | -0.370202471 |
| 1630 | FP565260.7 | 0.033247522 | 0.03106687  | 0.811850916 | -0.370231729 |
| 1631 | RPS4Y2     | 0.007920175 | 0.008657562 | 0.390994099 | 0.473915056  |
| 1632 | LINC02536  | 0.017317373 | 0.025145115 | 0.266518941 | -0.40731965  |
| 1633 | AC245427.3 | 0.003000978 | 1.18E-08    | 0.085045933 | 0.526275244  |

|      |            |             |             |             |              |
|------|------------|-------------|-------------|-------------|--------------|
| 1634 | FRG1DP     | 0.047080109 | 0.025325629 | 0.495614735 | -0.347946527 |
| 1635 | AP001206.1 | 0.011126507 | 0.004583858 | 0.346379943 | 0.453236454  |
| 1636 | AC116618.1 | 0.01553936  | 0.005423569 | 0.072903683 | -0.413263139 |
| 1637 | AC008038.1 | 0.005219431 | 0.020529647 | 0.963681702 | 0.497779862  |
| 1638 | OR5AK4P    | 0.01553936  | 0.015326436 | NA          | -0.413263139 |
| 1639 | DVL2       | 0.368151884 | 0.009928175 | 0.025385927 | -0.209799493 |
| 1640 | SLC25A5    | 0.663762799 | 0.009678759 | 0.026862368 | -0.13074938  |
| 1641 | WDR54      | 0.05806903  | 0.042491557 | 0.002655982 | -0.338891841 |
| 1642 | IFRD1      | 0.13049899  | 0.000354197 | 0.000914791 | -0.285360386 |
| 1643 | CRAMP1     | 0.321495265 | 0.009076121 | 0.026890677 | -0.225340017 |
| 1644 | TENM1      | 0.62344489  | 0.007740477 | 0.002811291 | 0.147601303  |
| 1645 | ZNF207     | 0.885144341 | 0.000776011 | 0.01185117  | -0.046681613 |
| 1646 | UQCRC1     | 0.789497065 | 0.014126904 | 0.033210224 | -0.08122654  |
| 1647 | NISCH      | 0.945981977 | 5.66E-07    | 0.011657248 | -0.021843759 |
| 1648 | LYPLA2     | 0.181218957 | 0.02937692  | 0.006097407 | -0.259251204 |
| 1649 | TTC19      | 0.329569724 | 0.000606947 | 0.001315844 | -0.222833456 |
| 1650 | MAP4K3     | 0.171250426 | 0.008598785 | 0.002159732 | -0.264100836 |
| 1651 | MVP        | 0.951909854 | 9.41E-07    | 0.005148014 | 0.019366318  |
| 1652 | NUB1       | 0.187379048 | 0.005203934 | 0.000958526 | -0.256482292 |
| 1653 | ZDHHC6     | 0.212218926 | 0.000308941 | 0.000554984 | -0.246582316 |
| 1654 | NDUFS1     | 0.366783473 | 0.029993769 | 9.01E-06    | -0.210321813 |
| 1655 | ALAS1      | 0.092210372 | 0.008141354 | 0.007043456 | -0.310696739 |
| 1656 | UBR2       | 0.063370084 | 0.006203318 | 0.00069492  | -0.334588055 |
| 1657 | DEPDC1     | 0.214246386 | 0.003720871 | 0.019799688 | -0.245929484 |
| 1658 | SLAMF7     | 0.421674231 | 0.000237719 | 0.003141188 | -0.191501662 |
| 1659 | UBA6       | 0.401394798 | 0.003976992 | 0.012225321 | -0.198349951 |
| 1660 | MAP2K3     | 0.648142036 | 0.000197119 | 9.62E-05    | -0.13626697  |
| 1661 | PEX3       | 0.312914336 | 0.013492288 | 0.007709116 | -0.227631639 |
| 1662 | MAT2B      | 0.077809198 | 0.002895912 | 3.55E-05    | -0.322438358 |
| 1663 | TRIO       | 0.130924784 | 0.032567889 | 0.025081888 | -0.28514409  |
| 1664 | PHF23      | 0.059436241 | 0.002565206 | 0.019799688 | -0.338033367 |
| 1665 | PSMA4      | 0.976064137 | 0.039371703 | 0.017714229 | 0.009572224  |
| 1666 | CTNNA1     | 0.192418913 | 0.004989026 | 7.43E-06    | -0.254357754 |
| 1667 | POLR2B     | 0.390577299 | 0.030801331 | 0.043047697 | 0.207308889  |
| 1668 | SNX29      | 0.190925825 | 0.030234805 | 0.040642107 | -0.254892255 |
| 1669 | H6PD       | 0.328922637 | 0.000135632 | 0.004990632 | -0.223024704 |
| 1670 | DKK3       | 0.060882015 | 0.000416867 | 0.004918894 | -0.33668098  |
| 1671 | MXD1       | 0.077608484 | 0.000252738 | 0.004577705 | -0.322630211 |
| 1672 | MON2       | 0.058144309 | 0.000241533 | 6.03E-05    | -0.338810708 |
| 1673 | TAF2       | 0.765825705 | 0.009980628 | 0.019799688 | -0.090674394 |
| 1674 | SUGP2      | 0.36430238  | 0.045309086 | 0.034268458 | -0.21115536  |
| 1675 | WDR18      | 0.131593713 | 0.014722151 | 0.001572226 | -0.28474719  |
| 1676 | ADAT1      | 0.684172937 | 0.009505173 | 0.010317263 | -0.122859125 |

|      |          |             |             |             |              |
|------|----------|-------------|-------------|-------------|--------------|
| 1677 | SPEN     | 0.700539013 | 0.028725377 | 0.043377364 | -0.116409582 |
| 1678 | CYB5R4   | 0.880855628 | 0.001329253 | 0.028158469 | 0.048773042  |
| 1679 | TLE2     | 0.223681365 | 0.00655739  | 0.025708977 | -0.243722009 |
| 1680 | CD84     | 0.797932738 | 2.55E-05    | 0.000127592 | 0.078729158  |
| 1681 | ISOC1    | 0.674170349 | 0.002468879 | 0.045650247 | -0.126782899 |
| 1682 | IP6K2    | 0.123004514 | 0.025067094 | 0.002375999 | -0.290018794 |
| 1683 | TGFBR3   | 0.624891105 | 0.001262403 | 0.019971437 | -0.144420158 |
| 1684 | RAB27A   | 0.294500505 | 2.18E-05    | 0.002213769 | -0.23320001  |
| 1685 | CSNK2A2  | 0.17589947  | 0.005834553 | 0.005516137 | -0.261870984 |
| 1686 | RPL31    | 0.613446026 | 0.02700363  | 0.02625602  | -0.148443939 |
| 1687 | SNX13    | 0.625653968 | 0.004747579 | 0.044001819 | -0.144131922 |
| 1688 | CPSF1    | 0.086225207 | 0.0026787   | 0.019799688 | -0.315530085 |
| 1689 | ZFYVE26  | 0.059177482 | 0.010047233 | 0.006823684 | -0.33815226  |
| 1690 | HSD17B10 | 0.112489363 | 0.024272218 | 0.041362933 | -0.295445141 |
| 1691 | NSF      | 0.721519506 | 0.017957635 | 3.40E-05    | -0.108286803 |
| 1692 | CLASP1   | 0.944263872 | 0.033483402 | 0.010283848 | -0.022612249 |
| 1693 | ATP2A3   | 0.918278265 | 0.023249495 | 0.000111702 | 0.033786197  |
| 1694 | GTSE1    | 0.162165993 | 0.001638964 | 0.005148014 | -0.268689618 |
| 1695 | MARK3    | 0.183621994 | 0.000409766 | 0.000773931 | -0.258160674 |
| 1696 | PTPN23   | 0.10299555  | 0.000557903 | 0.007130496 | -0.302479424 |
| 1697 | TPD52    | 0.105210972 | 1.98E-05    | 0.048111245 | 0.312647903  |
| 1698 | PAG1     | 0.922725207 | 0.006134201 | 0.013407511 | 0.031950477  |
| 1699 | CAPZB    | 0.069175305 | 0.003582529 | 0.000402122 | -0.329370993 |
| 1700 | PIAS2    | 0.204560003 | 0.031080465 | 0.039230309 | 0.257205618  |
| 1701 | UBE2K    | 0.588562433 | 0.000233987 | 0.005148014 | -0.156887678 |
| 1702 | CLDND1   | 0.935577331 | 7.51E-08    | 0.000886702 | 0.026401369  |
| 1703 | CROCCP3  | 0.066600751 | 0.046723463 | 0.046714812 | -0.331718951 |
| 1704 | AP4E1    | 0.060000758 | 0.039523717 | 0.000587399 | -0.337474679 |
| 1705 | HSPB11   | 0.619515435 | 5.47E-05    | 4.68E-05    | 0.149061581  |
| 1706 | CYLD     | 0.887987564 | 0.01351715  | 0.00888078  | -0.045476904 |
| 1707 | PPIE     | 0.219994003 | 0.001615552 | 0.016285098 | -0.244484713 |
| 1708 | GSTP1    | 0.666523641 | 0.003635094 | 0.019320561 | -0.129751102 |
| 1709 | EIF3I    | 0.775034909 | 0.000280059 | 0.000146432 | 0.088052186  |
| 1710 | TXLNA    | 0.775281011 | 0.003736998 | 0.036833133 | -0.086986554 |
| 1711 | NCOA1    | 0.059170002 | 7.30E-06    | 1.12E-06    | -0.338156055 |
| 1712 | RAB10    | 0.475480841 | 0.011676159 | 0.017731173 | -0.175648625 |
| 1713 | HADHA    | 0.212924752 | 0.000174836 | 0.000982988 | -0.246314054 |
| 1714 | ZFAND6   | 0.877400701 | 0.001047607 | 0.026890677 | 0.050238532  |
| 1715 | GMCL1    | 0.344974402 | 0.026169984 | 0.0315851   | -0.217637818 |
| 1716 | AURKA    | 0.180667066 | 0.016667319 | 0.000318701 | -0.259506742 |
| 1717 | TPX2     | 0.055540686 | 0.002974163 | 0.026890677 | -0.340921218 |
| 1718 | FKBP1A   | 0.10497396  | 0.039593861 | 0.007325557 | 0.312863119  |
| 1719 | KDM2B    | 0.071182564 | 0.033063751 | 0.014410893 | -0.327756285 |

|      |         |             |             |             |              |
|------|---------|-------------|-------------|-------------|--------------|
| 1720 | BIRC5   | 0.223237706 | 0.00800224  | 0.000318701 | -0.243795379 |
| 1721 | LTBP4   | 0.343554763 | 0.024582241 | 0.005313983 | -0.218105558 |
| 1722 | SPAG7   | 0.115228773 | 0.003962063 | 0.011367704 | 0.304943099  |
| 1723 | MFSD11  | 0.326299476 | 0.040699564 | 0.000372492 | -0.223818741 |
| 1724 | SH2D3C  | 0.624074427 | 0.00440547  | 0.001712244 | 0.147379451  |
| 1725 | FKBP5   | 0.71708276  | 9.23E-05    | 5.85E-06    | -0.10977554  |
| 1726 | IL12RB1 | 0.788097847 | 0.048064753 | 0.014460369 | -0.0817741   |
| 1727 | SH3GLB1 | 0.113672779 | 0.021591633 | 0.011636298 | -0.29460183  |
| 1728 | WASHC2A | 0.071662174 | 0.000945772 | 0.007501187 | -0.327297417 |
| 1729 | MAST3   | 0.062840635 | 0.000168464 | 0.006336334 | -0.335088504 |
| 1730 | MYO9B   | 0.911971088 | 0.030413154 | 1.83E-07    | -0.03623153  |
| 1731 | CRKL    | 0.446007007 | 0.000496846 | 0.002917434 | -0.184214022 |
| 1732 | GRK3    | 0.205622751 | 0.01365211  | 0.025708977 | -0.248753833 |
| 1733 | SBF1    | 0.737543179 | 0.043814505 | 0.025708977 | 0.103241508  |
| 1734 | ASCC2   | 0.614178429 | 0.00758363  | 0.019953515 | 0.150993758  |
| 1735 | ABHD4   | 0.79715119  | 0.029641532 | 0.026890677 | 0.079077001  |
| 1736 | VRK1    | 0.701315479 | 0.022906049 | 0.021237206 | 0.117808283  |
| 1737 | SRP54   | 0.540263683 | 0.001465007 | 0.014520219 | -0.168652273 |
| 1738 | PSME2   | 0.960918692 | 4.20E-05    | 0.00302875  | 0.015575712  |
| 1739 | ZMYND8  | 0.842072817 | 0.005491174 | 0.002389873 | -0.061017017 |
| 1740 | NFATC2  | 0.082190234 | 0.020871014 | 0.001094743 | -0.319100749 |
| 1741 | PABPC1L | 0.975057919 | 0.002408424 | 0.00215646  | -0.009999259 |
| 1742 | NELFCD  | 0.231510953 | 0.000293772 | 0.001726294 | -0.242854033 |
| 1743 | CDS2    | 0.471214696 | 0.014847155 | 0.007993208 | -0.176816015 |
| 1744 | SIRPB1  | 0.20690916  | 0.002797522 | 3.23E-05    | -0.24834898  |
| 1745 | IDH3B   | 0.065496591 | 0.005717111 | 0.031417534 | -0.332639683 |
| 1746 | ATP11C  | 0.106430307 | 8.92E-06    | 0.000578725 | -0.29989997  |
| 1747 | PGK1    | 0.284659333 | 3.72E-05    | 0.019799688 | 0.24315226   |
| 1748 | ZDHHC15 | 0.225898554 | 0.001087069 | 0.005148014 | -0.243384933 |
| 1749 | CORO1A  | 0.26626826  | 0.01340284  | 0.001070569 | 0.246581265  |
| 1750 | NUP93   | 0.797641121 | 0.035050785 | 0.007655029 | 0.078853168  |
| 1751 | MON1B   | 0.354719052 | 0.02607945  | 0.000192342 | -0.214283534 |
| 1752 | NUBP1   | 0.177724923 | 0.025526774 | 0.002624333 | -0.260976082 |
| 1753 | CAPN15  | 0.063303011 | 0.002769702 | 0.019799688 | -0.334659287 |
| 1754 | EHD4    | 0.094785904 | 0.006151778 | 0.003351335 | -0.308609196 |
| 1755 | BMF     | 0.384623193 | 0.012738405 | 0.00208965  | -0.204136921 |
| 1756 | ZDHHC2  | 0.99519137  | 0.001226951 | 0.028583369 | -0.002112728 |
| 1757 | DECR1   | 0.323296919 | 0.039048759 | 0.009461731 | -0.224710645 |
| 1758 | TRPS1   | 0.131960893 | 5.93E-06    | 0.002158973 | 0.295052053  |
| 1759 | SNX16   | 0.068159902 | 0.037845799 | 0.032678192 | -0.330343628 |
| 1760 | ECH1    | 0.101127328 | 0.003982666 | 0.018247725 | 0.315951855  |
| 1761 | IL27RA  | 0.104638722 | 0.046809676 | 0.005796604 | -0.301311056 |
| 1762 | AKT2    | 0.77954037  | 0.02297441  | 0.044001819 | 0.086143397  |



|      |          |             |             |             |              |
|------|----------|-------------|-------------|-------------|--------------|
| 1763 | SLC1A5   | 0.065850672 | 0.026412513 | 0.007501187 | -0.332375041 |
| 1764 | NAPA     | 0.395309703 | 0.003503986 | 0.000132025 | 0.205593361  |
| 1765 | PLA2G4C  | 0.050371788 | 0.00042692  | 0.006614607 | -0.343584291 |
| 1766 | WDR83OS  | 0.879257433 | 5.34E-06    | 0.001996246 | 0.049468625  |
| 1767 | KXD1     | 0.365576068 | 0.00062793  | 0.046389901 | 0.216472318  |
| 1768 | PIK3CG   | 0.987096459 | 0.006590772 | 0.007887063 | 0.005669415  |
| 1769 | CASP2    | 0.289121047 | 0.04003228  | 0.00309114  | -0.234710046 |
| 1770 | TMEM106B | 0.293814721 | 0.008407858 | 0.013860252 | -0.233428877 |
| 1771 | ZNF862   | 0.178107506 | 0.016998511 | 0.000158286 | -0.260789764 |
| 1772 | GIMAP2   | 0.916812922 | 0.049225915 | 0.016550509 | -0.034234832 |
| 1773 | TMEM245  | 0.129741841 | 0.043792654 | 0.023300618 | -0.285825348 |
| 1774 | NPDC1    | 0.160750647 | 0.006928919 | 0.000318701 | -0.269436933 |
| 1775 | PLEKHA1  | 0.063303453 | 7.77E-07    | 0.010418185 | 0.349353844  |
| 1776 | GLRX3    | 0.60594549  | 0.034489374 | 0.025210215 | -0.150922175 |
| 1777 | SLC25A11 | 0.050790764 | 0.003077353 | 0.007325557 | -0.343139822 |
| 1778 | UTP6     | 0.650808914 | 0.032721158 | 0.028283832 | -0.135223256 |
| 1779 | DHX58    | 0.155642163 | 0.000120642 | 0.026890677 | -0.272137787 |
| 1780 | PRKAR1A  | 0.205697525 | 2.23E-06    | 0.000284575 | 0.256723049  |
| 1781 | MANBA    | 0.148839025 | 4.73E-07    | 2.80E-05    | -0.275810758 |
| 1782 | LRP2BP   | 0.053170791 | 0.008838517 | 0.019799688 | -0.342660263 |
| 1783 | MTCH2    | 0.753537182 | 0.035074209 | 0.025081888 | 0.096651749  |
| 1784 | VWA5A    | 0.093966164 | 0.018775863 | 0.001797795 | -0.309259147 |
| 1785 | LPXN     | 0.709488416 | 0.026645637 | 0.00195074  | 0.114446956  |
| 1786 | FBXO3    | 0.862002525 | 0.041447306 | 0.000846151 | -0.054187063 |
| 1787 | GTF2H1   | 0.224395935 | 0.024490144 | 0.001217071 | -0.243609112 |
| 1788 | CLEC2B   | 0.957324916 | 0.018517241 | 0.036023521 | 0.017060623  |
| 1789 | COQ5     | 0.813905688 | 0.000373442 | 0.019799688 | -0.072049218 |
| 1790 | BIN2     | 0.404817657 | 0.001665103 | 0.00309114  | -0.197204659 |
| 1791 | OAS3     | 0.089064895 | 0.003488269 | 0.026402336 | -0.313197252 |
| 1792 | IFNG     | 0.92414857  | 0.003346025 | 1.76E-05    | -0.031204395 |
| 1793 | ENO2     | 0.071542674 | 0.01112804  | 0.023018304 | -0.327417875 |
| 1794 | FGFR1OP2 | 0.353217695 | 0.007350656 | 0.006041929 | -0.214797038 |
| 1795 | TMEM14C  | 0.054239821 | 0.029169435 | 0.027342557 | -0.341996382 |
| 1796 | SERINC1  | 0.370991225 | 0.000119252 | 0.001685357 | 0.214398781  |
| 1797 | TRIM38   | 0.111307241 | 0.007883273 | 0.008734076 | -0.296250444 |
| 1798 | NNT      | 0.809191528 | 0.017225179 | 0.000481874 | -0.074025444 |
| 1799 | PFDN1    | 0.19405631  | 0.036000529 | 0.044418219 | -0.253645992 |
| 1800 | IK       | 0.360261915 | 0.013042576 | 0.004420644 | -0.212524934 |
| 1801 | ITK      | 0.181376555 | 9.01E-05    | 0.03844331  | -0.25918048  |
| 1802 | TTC1     | 0.143913295 | 0.00018321  | 0.000128017 | -0.278138333 |
| 1803 | NPRL2    | 0.771066442 | 0.023041465 | 5.79E-05    | 0.089584205  |
| 1804 | CYB561D2 | 0.352684963 | 0.021080343 | 0.009874361 | 0.220881552  |
| 1805 | SNX4     | 0.895779086 | 0.028855231 | 0.005088212 | -0.042681174 |

|      |          |             |             |             |              |
|------|----------|-------------|-------------|-------------|--------------|
| 1806 | GORASP1  | 0.221675084 | 0.002728037 | 0.005148014 | -0.244094599 |
| 1807 | SSR3     | 0.191165141 | 0.000748992 | 0.009501924 | -0.254783934 |
| 1808 | SNX17    | 0.758185279 | 0.00448431  | 0.000679555 | -0.093658449 |
| 1809 | AUP1     | 0.718004072 | 0.038951061 | 0.001226784 | -0.109371776 |
| 1810 | STAT1    | 0.159419197 | 0.000661758 | 0.000996881 | -0.27012998  |
| 1811 | RAB3GAP1 | 0.213744745 | 0.000295588 | 0.03785746  | 0.253892986  |
| 1812 | C2orf42  | 0.093007039 | 0.002591467 | 0.001911715 | -0.310044505 |
| 1813 | RPL22    | 0.106067546 | 0.016569632 | 0.00180091  | -0.300182546 |
| 1814 | FBXO6    | 0.062843507 | 0.00069537  | 9.04E-05    | -0.335083838 |
| 1815 | C1orf21  | 0.293769901 | 0.003912115 | 0.000494247 | -0.23344005  |
| 1816 | TBCE     | 0.125799823 | 0.000378742 | 0.021288368 | -0.288275396 |
| 1817 | UAP1     | 0.40631611  | 0.000236469 | 0.041550182 | 0.201623428  |
| 1818 | RAB29    | 0.115650496 | 0.008092935 | 0.028926715 | -0.29340608  |
| 1819 | P3H1     | 0.15366795  | 0.013453943 | 0.000244308 | -0.273148164 |
| 1820 | DR1      | 0.628767944 | 0.008718496 | 0.001315844 | -0.14294883  |
| 1821 | RPS6KA1  | 0.380389969 | 0.001360016 | 0.009461731 | -0.205454101 |
| 1822 | ARID1A   | 0.215144783 | 0.012154    | 0.002044906 | -0.24567874  |
| 1823 | RPA2     | 0.772035351 | 0.000499159 | 0.004324198 | -0.088165869 |
| 1824 | STAG1    | 0.786178713 | 0.008461884 | 0.001619245 | -0.08257264  |
| 1825 | LRMP     | 0.673969573 | 0.028364976 | 0.001757749 | -0.126872865 |
| 1826 | FBXL5    | 0.090583486 | 0.003768624 | 0.000119057 | -0.312002406 |
| 1827 | CPSF3    | 0.637267344 | 0.01417214  | 0.001209209 | -0.140275302 |
| 1828 | GLE1     | 0.10600868  | 0.032483511 | 0.01036143  | -0.300228501 |
| 1829 | NRDE2    | 0.168272142 | 0.002988548 | 0.020503951 | -0.265624393 |
| 1830 | SLC17A5  | 0.15012455  | 0.031046782 | 0.000600295 | -0.275117329 |
| 1831 | CNNM1    | 0.224663784 | 0.000814312 | 0.001315844 | -0.24356394  |
| 1832 | GOT1     | 0.558495139 | 0.031478484 | 0.025928333 | -0.165746671 |
| 1833 | GNA13    | 0.733502778 | 0.000221064 | 0.010485806 | 0.104924141  |
| 1834 | SLC10A7  | 0.068682122 | 0.011704695 | 0.026402336 | -0.329851354 |
| 1835 | DNAJC15  | 0.863356764 | 0.00021454  | 0.033910754 | 0.054003745  |
| 1836 | WASHC3   | 0.142443564 | 0.012705935 | 0.000262494 | -0.278952169 |
| 1837 | FAM117A  | 0.124979042 | 0.000927347 | 0.026402336 | -0.288798626 |
| 1838 | TMEM156  | 0.106084401 | 5.31E-07    | 0.006614607 | -0.300170815 |
| 1839 | ZC3H7A   | 0.08413787  | 0.000560145 | 0.004664829 | -0.31737242  |
| 1840 | EGR2     | 0.27710981  | 0.000607428 | 0.028436632 | 0.245084322  |
| 1841 | ACOT9    | 0.32322972  | 0.002433067 | 0.025708977 | -0.224729657 |
| 1842 | ADGRE5   | 0.193541917 | 0.000766956 | 0.000383415 | -0.253887584 |
| 1843 | NCKAP1L  | 0.714458588 | 2.73E-05    | 3.05E-06    | -0.110886819 |
| 1844 | STIL     | 0.144784515 | 0.007251132 | 0.025081888 | -0.277670802 |
| 1845 | METTL8   | 0.163951234 | 0.002507553 | 3.53E-05    | -0.267819831 |
| 1846 | NMI      | 0.069572849 | 0.027530793 | 1.65E-05    | -0.329007244 |
| 1847 | PIGT     | 0.106424153 | 0.004081716 | 0.000376458 | -0.299905081 |
| 1848 | ZNFX1    | 0.709543716 | 0.013266338 | 0.004507093 | -0.112808018 |

|      |          |             |             |             |              |
|------|----------|-------------|-------------|-------------|--------------|
| 1849 | ZBP1     | 0.107313017 | 0.000991739 | 0.000647874 | -0.299283616 |
| 1850 | STAMBP   | 0.115738179 | 0.012972216 | 0.024970193 | -0.293347559 |
| 1851 | ZNF45    | 0.9320107   | 0.009038148 | 0.002982253 | 0.027895008  |
| 1852 | ATXN1    | 0.579948709 | 0.036867331 | 0.021428695 | -0.159708077 |
| 1853 | LRRFIP1  | 0.99742532  | 0.000782162 | 0.039192624 | 0.001127093  |
| 1854 | UPF3B    | 0.072231425 | 0.009811435 | 0.047795046 | -0.326784316 |
| 1855 | ATP5S    | 0.089729531 | 0.020522725 | 0.003293359 | -0.312694544 |
| 1856 | IL37     | 0.206329493 | 0.000928229 | 0.005148014 | -0.248533702 |
| 1857 | SH2D3A   | 0.13195357  | 0.029032188 | 0.007245393 | -0.284520055 |
| 1858 | PSMF1    | 0.734115807 | 0.015992276 | 0.029270812 | 0.104685629  |
| 1859 | COX6B1   | 0.584474086 | 0.003056051 | 0.007957503 | 0.161422935  |
| 1860 | IRF3     | 0.955871378 | 0.023604244 | 0.008738434 | -0.017643814 |
| 1861 | BECN1    | 0.808085695 | 0.006708177 | 0.001797795 | -0.074449332 |
| 1862 | INTS11   | 0.115140711 | 3.86E-05    | 0.006290705 | -0.293753662 |
| 1863 | PNKD     | 0.359929266 | 0.015339279 | 0.000219353 | -0.21264776  |
| 1864 | PEX1     | 0.088984849 | 0.021013133 | 0.011530006 | -0.313271868 |
| 1865 | RAC2     | 0.806981567 | 0.002391837 | 0.001703048 | 0.075576095  |
| 1866 | APOBEC3F | 0.096531437 | 0.010608145 | 0.000996881 | -0.307236034 |
| 1867 | NDUFA5   | 0.502432454 | 0.008739433 | 0.037682063 | 0.173863804  |
| 1868 | ARPP19   | 0.647370336 | 0.010280371 | 0.018847047 | 0.138947177  |
| 1869 | SUMF2    | 0.064594849 | 0.003800779 | 0.00069492  | -0.333455855 |
| 1870 | SPCS3    | 0.81824304  | 0.001520454 | 0.009183828 | -0.070313882 |
| 1871 | MPDU1    | 0.195690234 | 0.010879534 | 0.016912523 | -0.252941641 |
| 1872 | ASH2L    | 0.4551314   | 0.000850278 | 0.001933451 | -0.181294689 |
| 1873 | KLHDC7B  | 0.055363424 | 0.004273569 | 0.019799688 | -0.341096724 |
| 1874 | ZBTB46   | 0.050539833 | 0.014650217 | 0.019799688 | -0.343402809 |
| 1875 | TUBGCP2  | 0.078161985 | 0.01209002  | 0.018641828 | -0.322155367 |
| 1876 | TRIM28   | 0.297701345 | 0.015451669 | 0.037618719 | -0.23220257  |
| 1877 | SYNE1    | 0.853483271 | 2.49E-07    | 0.000151123 | 0.056810033  |
| 1878 | ACLY     | 0.157901048 | 0.00015759  | 0.001578847 | -0.270926969 |
| 1879 | TOP2A    | 0.070718263 | 0.0006428   | 0.001315844 | -0.328179792 |
| 1880 | FMO5     | 0.308074774 | 0.022823535 | 0.026890677 | -0.229103172 |
| 1881 | DHX30    | 0.855266776 | 0.000100537 | 0.000564254 | -0.055628972 |
| 1882 | JCHAIN   | 0.378345559 | 0.000691197 | 0.000135777 | -0.206156768 |
| 1883 | ALOX5AP  | 0.773882204 | 4.63E-05    | 0.026380035 | 0.088457353  |
| 1884 | SLC41A1  | 0.19513525  | 0.009002066 | 0.000481874 | -0.253163351 |
| 1885 | LGR6     | 0.128816773 | 0.040704507 | 0.001948152 | -0.286411462 |
| 1886 | RFC3     | 0.156320497 | 0.002787145 | 0.019799688 | -0.271794576 |
| 1887 | GIMAP4   | 0.946022442 | 0.001912512 | 0.028263632 | 0.021885475  |
| 1888 | PPHLN1   | 0.753129948 | 0.044350663 | 0.005811436 | -0.095634994 |
| 1889 | ROCK2    | 0.134596964 | 1.49E-05    | 0.048141576 | 0.293344501  |
| 1890 | FBXO18   | 0.818862572 | 0.015481143 | 0.026859654 | 0.070657216  |
| 1891 | CDC48    | 0.216727479 | 0.003990501 | 0.019799688 | -0.245248407 |

|      |         |             |             |             |              |
|------|---------|-------------|-------------|-------------|--------------|
| 1892 | OSTF1   | 0.181720314 | 0.000682625 | 0.000117461 | -0.259005553 |
| 1893 | CCDC146 | 0.49775131  | 1.08E-05    | 9.45E-06    | -0.170748578 |
| 1894 | PHF21A  | 0.390257907 | 0.000299702 | 0.032703709 | 0.20739971   |
| 1895 | EIF4E2  | 0.810647497 | 0.02314243  | 0.038630854 | -0.073414453 |
| 1896 | VILL    | 0.088575784 | 0.040113438 | 0.001905029 | -0.313632594 |
| 1897 | CHST12  | 0.152752699 | 8.79E-06    | 0.000892183 | -0.273655709 |
| 1898 | AOAH    | 0.134114702 | 0.002325733 | 0.031850237 | -0.283223842 |
| 1899 | NMT1    | 0.091351083 | 0.002946383 | 0.005148014 | -0.311407888 |
| 1900 | TANK    | 0.496541569 | 0.003426576 | 0.003167969 | -0.170930518 |
| 1901 | SAP130  | 0.65074667  | 0.001616401 | 0.016041686 | -0.135248751 |
| 1902 | ARPC5L  | 0.449744019 | 0.030863001 | 0.017207284 | -0.182989829 |
| 1903 | IL11RA  | 0.055073954 | 0.024724041 | 0.026890677 | -0.341342008 |
| 1904 | RNF38   | 0.389772331 | 2.09E-06    | 0.026455516 | -0.202323198 |
| 1905 | CD72    | 0.191718705 | 0.003383479 | 0.019799688 | -0.254640788 |
| 1906 | RAB30   | 0.232378764 | 0.044770376 | 0.008911206 | -0.242765341 |
| 1907 | SQOR    | 0.071297235 | 0.00105628  | 0.019799688 | -0.327662898 |
| 1908 | THBS1   | 0.951382173 | 2.50E-05    | 0.00604478  | 0.019603632  |
| 1909 | KIF23   | 0.063179439 | 0.017487634 | 0.001797795 | -0.334782625 |
| 1910 | GTF2B   | 0.18951373  | 3.04E-08    | 0.044777531 | 0.263973875  |
| 1911 | IFI44L  | 0.575226911 | 0.012696399 | 0.000244465 | -0.16124327  |
| 1912 | ACTR2   | 0.921906287 | 0.000796911 | 0.000325411 | -0.032179904 |
| 1913 | KIF11   | 0.187950003 | 0.011489415 | 0.007463156 | -0.256219193 |
| 1914 | NAB1    | 0.490820308 | 0.00180603  | 6.03E-07    | -0.171976691 |
| 1915 | SPPL2A  | 0.054249195 | 0.000316224 | 0.008677654 | -0.341986496 |
| 1916 | PARP16  | 0.259255571 | 2.23E-05    | 0.040790026 | 0.248350622  |
| 1917 | CENPE   | 0.615094249 | 0.004833887 | 0.027804498 | -0.1478489   |
| 1918 | PAPSS1  | 0.089548387 | 0.036282717 | 0.006059768 | -0.312837372 |
| 1919 | ETNK1   | 0.439567388 | 0.000494571 | 0.004639387 | 0.190018268  |
| 1920 | ZCRB1   | 0.985736664 | 0.012850881 | 0.039639572 | 0.006229029  |
| 1921 | SLC15A4 | 0.669484502 | 0.000968036 | 0.011134745 | -0.128616051 |
| 1922 | MTMR6   | 0.163291206 | 0.01825897  | 0.013553738 | -0.268172188 |
| 1923 | MAP3K12 | 0.213184111 | 0.000159604 | 7.91E-05    | -0.246230122 |
| 1924 | DENR    | 0.574460419 | 6.71E-06    | 0.002327055 | 0.164840179  |
| 1925 | NOVA1   | 0.213910801 | 0.026896126 | 0.001315844 | -0.246022892 |
| 1926 | WARS    | 0.883286819 | 0.007318544 | 0.030211398 | 0.047733103  |
| 1927 | CDAN1   | 0.084447162 | 0.019101543 | 0.019799688 | -0.317103181 |
| 1928 | ABHD2   | 0.627795846 | 0.001275409 | 0.000123352 | -0.143322405 |
| 1929 | NCOR1   | 0.082203112 | 2.63E-05    | 0.000234864 | -0.319090835 |
| 1930 | SCRN2   | 0.079036866 | 0.001114122 | 0.024998166 | -0.321487529 |
| 1931 | SS18    | 0.987293542 | 0.015603685 | 0.041362933 | -0.005572074 |
| 1932 | WRAP53  | 0.150648318 | 0.032598834 | 0.025081888 | -0.274812341 |
| 1933 | RAB40B  | 0.160556562 | 0.001317025 | 0.005148014 | -0.269546063 |
| 1934 | PTPRF   | 0.057232845 | 0.002944019 | 0.007043456 | -0.339636957 |

|      |          |             |             |             |              |
|------|----------|-------------|-------------|-------------|--------------|
| 1935 | UFC1     | 0.495827946 | 0.019851689 | 0.043785354 | 0.174773804  |
| 1936 | FCRL5    | 0.158031532 | 0.000948719 | 7.91E-05    | -0.270859433 |
| 1937 | PRUNE1   | 0.377630958 | 0.000363275 | 0.024726388 | 0.211901571  |
| 1938 | SLC39A1  | 0.560505082 | 7.88E-07    | 1.86E-06    | -0.165245292 |
| 1939 | ACP1     | 0.844139006 | 0.002122387 | 0.037491439 | 0.060716798  |
| 1940 | SNAP47   | 0.368590114 | 0.007969001 | 0.000439097 | -0.209640618 |
| 1941 | LBR      | 0.365290796 | 0.005802257 | 0.004498867 | -0.210852609 |
| 1942 | PDIA6    | 0.339770185 | 0.023994109 | 0.023657145 | 0.225506244  |
| 1943 | HNRNPLL  | 0.936918345 | 0.01217041  | 0.005237409 | 0.025852997  |
| 1944 | CALM2    | 0.297102329 | 3.23E-09    | 0.007380103 | 0.239352008  |
| 1945 | CIAO1    | 0.311411085 | 0.000938512 | 0.001341339 | -0.228104432 |
| 1946 | RABL2A   | 0.287991636 | 0.024041518 | 0.032703709 | -0.235030026 |
| 1947 | SPAG16   | 0.097955211 | 0.00876131  | 0.007463156 | -0.306176549 |
| 1948 | LRIG1    | 0.379537498 | 0.019478244 | 0.019799688 | -0.205735495 |
| 1949 | RUBCN    | 0.107713844 | 3.88E-05    | 0.003979381 | -0.298981954 |
| 1950 | LYAR     | 0.376794836 | 0.000841319 | 0.044729016 | 0.212186284  |
| 1951 | SCD5     | 0.089811312 | 0.005161844 | 0.019799688 | -0.312635581 |
| 1952 | CCNA2    | 0.318423206 | 0.027476199 | 4.13E-05    | -0.226370211 |
| 1953 | PPIP5K2  | 0.458396913 | 0.002345136 | 9.07E-08    | -0.18025062  |
| 1954 | FBXL17   | 0.059646203 | 0.001363549 | 0.002100142 | -0.337820942 |
| 1955 | HIGD2A   | 0.741089073 | 4.88E-05    | 0.01273029  | 0.101740856  |
| 1956 | NCAPG2   | 0.142440976 | 0.006665494 | 0.024347719 | -0.278955085 |
| 1957 | ATP6V1B2 | 0.095005397 | 0.000653762 | 0.006290705 | -0.30843371  |
| 1958 | CHMP7    | 0.08424121  | 0.041245082 | 0.000445477 | -0.317273975 |
| 1959 | UTP23    | 0.155123793 | 0.003709263 | 0.000261851 | -0.272431915 |
| 1960 | SLC39A4  | 0.173243861 | 0.003198263 | 0.026890677 | -0.263070003 |
| 1961 | NAPRT    | 0.184731362 | 0.033324206 | 0.039510446 | -0.257662932 |
| 1962 | STOM     | 0.922001326 | 0.022665767 | 0.017618923 | -0.032138079 |
| 1963 | NOTCH1   | 0.143285399 | 0.00081581  | 0.002159732 | -0.278464052 |
| 1964 | MKI67    | 0.136243103 | 0.045811719 | 0.001315844 | -0.281945523 |
| 1965 | HIKESHI  | 0.134815068 | 0.047367147 | 0.003151349 | -0.28279346  |
| 1966 | MTA2     | 0.053653873 | 0.000892291 | 0.037468881 | -0.342447234 |
| 1967 | NUDT22   | 0.16214917  | 0.027747246 | 0.008534929 | -0.268697177 |
| 1968 | FERMT3   | 0.151985386 | 0.001602359 | 0.000126277 | -0.274078375 |
| 1969 | DLG2     | 0.055681996 | 0.011031608 | 0.005148014 | -0.340807754 |
| 1970 | NGLY1    | 0.87206641  | 0.002595028 | 0.001782266 | 0.052477462  |
| 1971 | CSNK1G3  | 0.585498296 | 5.07E-05    | 0.000288464 | -0.157877043 |
| 1972 | MMAA     | 0.329192728 | 0.00721293  | 0.025708977 | -0.222932765 |
| 1973 | INPP1    | 0.971823875 | 0.031572107 | 0.027804498 | -0.011233995 |
| 1974 | SACS     | 0.079351651 | 0.002337454 | 0.007346174 | -0.32122952  |
| 1975 | RABGAP1L | 0.592990499 | 0.033395626 | 0.023541713 | -0.155387723 |
| 1976 | ZNF256   | 0.225207531 | 0.008512942 | 0.005148014 | -0.24348358  |
| 1977 | ZFP36L2  | 0.122431759 | 8.96E-12    | 0.002571306 | 0.301160584  |

|      |          |             |             |             |              |
|------|----------|-------------|-------------|-------------|--------------|
| 1978 | RMND5A   | 0.899678398 | 0.013955891 | 0.013266602 | -0.041373153 |
| 1979 | CFDP1    | 0.180568178 | 0.002407973 | 0.018847047 | -0.259558299 |
| 1980 | C7orf31  | 0.215374945 | 0.004029008 | 0.019799688 | -0.245601623 |
| 1981 | HS2ST1   | 0.996666814 | 0.028065174 | 0.026304372 | 0.001464389  |
| 1982 | ATP5J    | 0.082516666 | 0.002313468 | 0.012427456 | -0.318812157 |
| 1983 | SAMSN1   | 0.720121552 | 0.005402762 | 0.002316646 | -0.108512623 |
| 1984 | PDIA4    | 0.428308693 | 6.72E-06    | 0.012134016 | -0.189319091 |
| 1985 | BATF     | 0.075946436 | 0.001278745 | 6.44E-05    | -0.324116294 |
| 1986 | UBE2L6   | 0.058524809 | 0.001413609 | 0.000363177 | -0.338442415 |
| 1987 | SLC38A10 | 0.535699735 | 0.005488811 | 0.004498867 | -0.168931603 |
| 1988 | LDLRAP1  | 0.068354207 | 0.002707599 | 0.017740611 | -0.330143624 |
| 1989 | EYA3     | 0.609973739 | 0.01609484  | 0.001206681 | 0.152347077  |
| 1990 | ADAMTS4  | 0.655851051 | 0.01323651  | 0.027804498 | 0.13554033   |
| 1991 | PSMD4    | 0.714502178 | 0.001725809 | 0.03802149  | -0.110870754 |
| 1992 | ATP6V0D1 | 0.761616659 | 0.011641864 | 0.049208412 | 0.093398191  |
| 1993 | CALM3    | 0.983560129 | 0.000772052 | 4.61E-06    | 0.006952123  |
| 1994 | RRP1B    | 0.129586579 | 0.048248107 | 0.046925991 | -0.285916828 |
| 1995 | ITGB2    | 0.677040023 | 6.72E-08    | 9.76E-06    | 0.127638076  |
| 1996 | PCSK7    | 0.112548671 | 0.009315674 | 0.007325557 | -0.295405999 |
| 1997 | FDPS     | 0.870678903 | 0.023250939 | 0.021403411 | 0.053094274  |
| 1998 | CCR5     | 0.831738179 | 0.002815203 | 0.023819225 | 0.065425208  |
| 1999 | PCYT1A   | 0.696683259 | 0.030069391 | 0.003363397 | -0.117993845 |
| 2000 | SAP30BP  | 0.06711022  | 0.000968294 | 0.047710421 | -0.331270741 |
| 2001 | PRPSAP1  | 0.465006881 | 0.029561159 | 0.004856962 | -0.178312466 |
| 2002 | ITGA5    | 0.077604129 | 0.000597629 | 0.037382848 | 0.336266769  |
| 2003 | UBXN1    | 0.992379427 | 0.047974778 | 0.028964883 | -0.003319365 |
| 2004 | MAGOH    | 0.980882993 | 0.005357085 | 0.011305081 | -0.007846199 |
| 2005 | RBBP4    | 0.099223281 | 0.040480142 | 0.041733368 | 0.317330486  |
| 2006 | MYSM1    | 0.926371757 | 0.028828956 | 0.005489041 | -0.03026939  |
| 2007 | SLC30A7  | 0.095048987 | 0.007951712 | 0.024970193 | -0.308401725 |
| 2008 | IER5     | 0.060671801 | 0.045254622 | 0.025708977 | -0.336887663 |
| 2009 | YY1AP1   | 0.97323758  | 0.028497246 | 0.007123857 | 0.010667261  |
| 2010 | GMPS     | 0.398246828 | 0.008870557 | 0.026890677 | -0.199407384 |
| 2011 | PRMT9    | 0.740469352 | 0.00374551  | 0.007926098 | -0.100711819 |
| 2012 | GRPEL2   | 0.900731867 | 0.018759447 | 0.007325557 | 0.041140087  |
| 2013 | CASP3    | 0.095686636 | 0.000909245 | 0.013582681 | -0.307912587 |
| 2014 | ERAP2    | 0.810035478 | 0.041455645 | 0.036444947 | 0.074362996  |
| 2015 | COG5     | 0.616538697 | 0.029174576 | 0.003203656 | -0.147330252 |
| 2016 | WASHC5   | 0.607602361 | 0.007310711 | 0.000836239 | -0.150321052 |
| 2017 | FXN      | 0.115378859 | 6.36E-06    | 0.048141576 | 0.304816709  |
| 2018 | C9orf64  | 0.60675636  | 0.043642184 | 0.000143144 | -0.150619351 |
| 2019 | SPTSSA   | 0.05780945  | 0.026460242 | 0.001911715 | -0.339108157 |
| 2020 | NUDT5    | 0.439781074 | 0.045489255 | 0.009648316 | 0.189951504  |

|      |            |             |             |             |              |
|------|------------|-------------|-------------|-------------|--------------|
| 2021 | PRDX3      | 0.837966479 | 0.003205081 | 0.026588069 | -0.062388905 |
| 2022 | PSMC3      | 0.066622877 | 8.83E-06    | 2.25E-06    | -0.331697649 |
| 2023 | SGPL1      | 0.378493024 | 0.00031279  | 0.004272606 | 0.211559323  |
| 2024 | RIC3       | 0.124644972 | 0.00329392  | 0.040699924 | 0.299861492  |
| 2025 | AKIP1      | 0.08679935  | 0.015867333 | 0.007250457 | -0.315023858 |
| 2026 | BEX3       | 0.095994792 | 0.010010833 | 0.019799688 | -0.30767909  |
| 2027 | PLK1       | 0.055150022 | 0.002396996 | 0.007325557 | -0.341284413 |
| 2028 | IRGQ       | 0.606508491 | 0.044847954 | 0.003923456 | -0.150713737 |
| 2029 | ZNF226     | 0.156981377 | 0.042060085 | 0.005568283 | -0.271396605 |
| 2030 | NDUFV1     | 0.573418439 | 0.023931874 | 0.047477249 | -0.161817667 |
| 2031 | ECI1       | 0.050225238 | 0.003862597 | 0.019799688 | -0.343753579 |
| 2032 | CX3CR1     | 0.225942586 | 0.001134684 | 0.019799688 | -0.243377723 |
| 2033 | STIP1      | 0.795282495 | 0.008306631 | 0.048757785 | -0.078966116 |
| 2034 | SLC20A2    | 0.061851083 | 0.00154387  | 0.000520395 | -0.335826065 |
| 2035 | TMUB2      | 0.417495171 | 0.049691818 | 0.042343713 | -0.192998414 |
| 2036 | STAT3      | 0.833304274 | 0.001083744 | 0.011305081 | -0.064248594 |
| 2037 | C2orf68    | 0.724413547 | 0.00272443  | 9.62E-05    | 0.108645449  |
| 2038 | RGS14      | 0.559982324 | 0.002979031 | 8.19E-05    | -0.165366815 |
| 2039 | LMAN2      | 0.20306117  | 0.000216457 | 0.000192361 | -0.249779567 |
| 2040 | PGM2       | 0.401438167 | 0.03166926  | 0.012227655 | -0.198330677 |
| 2041 | LIMS1      | 0.672773278 | 0.00938236  | 0.012107294 | 0.129380957  |
| 2042 | CHD3       | 0.096150653 | 8.99E-05    | 6.54E-05    | -0.307532755 |
| 2043 | KCNAB3     | 0.553297835 | 0.011241587 | 0.000559766 | 0.170419139  |
| 2044 | AC106795.1 | 0.543678713 | 0.025291486 | 0.019799688 | 0.171944804  |
| 2045 | SIK2       | 0.103831198 | 0.009386563 | 0.023319471 | -0.301934866 |
| 2046 | CDK1       | 0.219784673 | 0.00278016  | 0.005148014 | -0.24452194  |
| 2047 | TMED10     | 0.657805221 | 0.00032066  | 0.016394532 | -0.13291117  |
| 2048 | TMEM43     | 0.742908813 | 0.003878876 | 0.042562179 | 0.101106681  |
| 2049 | TADA3      | 0.097595417 | 0.000207302 | 0.000914791 | -0.306479615 |
| 2050 | TMEM126A   | 0.480056278 | 0.023501599 | 0.032737774 | -0.174437821 |
| 2051 | MRPL36     | 0.102405972 | 0.001812221 | 0.01255225  | -0.302965284 |
| 2052 | PIK3CD     | 0.082528975 | 0.004813529 | 0.00010987  | -0.318809688 |
| 2053 | PWWP2B     | 0.129985575 | 0.010239715 | 0.007709116 | -0.285666018 |
| 2054 | RRM2       | 0.219524904 | 0.002431846 | 0.005148014 | -0.244570751 |
| 2055 | SRGAP2C    | 0.713779528 | 0.026121464 | 6.03E-05    | -0.111163771 |
| 2056 | NME6       | 0.216614355 | 0.000121309 | 0.0073558   | -0.245275485 |
| 2057 | MBOAT1     | 0.131377344 | 0.037311731 | 0.026890677 | -0.284888539 |
| 2058 | RCAN2      | 0.41667158  | 0.00179752  | 0.000147702 | -0.19325626  |
| 2059 | IL16       | 0.151282684 | 0.031358391 | 0.001711498 | -0.274454244 |
| 2060 | THEMIS     | 0.61917581  | 0.001668495 | 0.017516949 | -0.146464611 |
| 2061 | DCP2       | 0.457862477 | 0.0026863   | 0.000385222 | 0.184579887  |
| 2062 | ANKRD13D   | 0.287907897 | 0.005283348 | 0.004805708 | -0.23505558  |
| 2063 | EVC2       | 0.057491257 | 0.001107015 | 0.019799688 | -0.33940479  |

|      |          |             |             |             |              |
|------|----------|-------------|-------------|-------------|--------------|
| 2064 | MTX1     | 0.17546932  | 0.020628813 | 0.025442946 | -0.26205993  |
| 2065 | MST1     | 0.129796604 | 0.002764012 | 0.019799688 | -0.28578792  |
| 2066 | CD7      | 0.717266492 | 0.021381966 | 0.001703048 | 0.111229227  |
| 2067 | PHOSPHO1 | 0.255082255 | 0.020129645 | 0.026890677 | -0.24156681  |
| 2068 | GPR160   | 0.225044252 | 0.00386902  | 0.019799688 | -0.243507911 |
| 2069 | KIAA1551 | 0.073579856 | 0.004570731 | 0.013876654 | -0.325573111 |
| 2070 | HRAS     | 0.070731614 | 0.005946696 | 0.019799688 | -0.32817009  |
| 2071 | GLMN     | 0.360263209 | 0.007353341 | 0.007302794 | -0.212524674 |
| 2072 | ATR      | 0.66354198  | 0.02978243  | 0.043754632 | -0.130823041 |
| 2073 | YPEL2    | 0.050690897 | 0.015725691 | 7.09E-08    | -0.343245953 |
| 2074 | LSM1     | 0.197991352 | 0.007624849 | 0.039243094 | -0.251927665 |
| 2075 | BAIAP2   | 0.299004829 | 0.001794908 | 0.007962594 | -0.231804231 |
| 2076 | A2M      | 0.099308724 | 1.28E-07    | 3.62E-06    | -0.305105144 |
| 2077 | USF3     | 0.907294994 | 0.003189495 | 0.009906867 | 0.038385586  |
| 2078 | ACSF3    | 0.717253172 | 0.009914412 | 0.00140205  | -0.109708054 |
| 2079 | SEC24C   | 0.096352156 | 0.01347817  | 0.007234653 | -0.307366395 |
| 2080 | ZBTB34   | 0.057243892 | 0.009753514 | 0.019799688 | -0.339627302 |
| 2081 | RBM44    | 0.227545136 | 0.001481475 | 0.005148014 | -0.243189302 |
| 2082 | RIC8A    | 0.355598857 | 0.003539083 | 0.000127592 | -0.214059012 |
| 2083 | PDE4DIP  | 0.448030049 | 1.54E-08    | 0.018377337 | 0.187849195  |
| 2084 | H3F3AP6  | 0.899051386 | 0.000234672 | 0.035341621 | 0.041791988  |
| 2085 | ZNF852   | 0.078941481 | 0.004153672 | 0.026890677 | -0.321579297 |
| 2086 | C17orf62 | 0.400921785 | 0.027405832 | 0.001060421 | -0.198499745 |
| 2087 | GAK      | 0.293803927 | 0.005016464 | 0.004452007 | 0.240470175  |
| 2088 | EIF3K    | 0.081191118 | 0.022876559 | 0.033910754 | 0.333088178  |
| 2089 | AURKB    | 0.135215075 | 0.000331928 | 0.019799688 | -0.282555064 |
| 2090 | PDXDC1   | 0.113007386 | 2.70E-05    | 0.019799688 | -0.295051818 |
| 2091 | HCLS1    | 0.496818572 | 1.16E-06    | 0.026645344 | 0.174622823  |
| 2092 | PAK2     | 0.164635818 | 0.000953226 | 0.043047697 | -0.267461599 |
| 2093 | SLC36A4  | 0.586624045 | 0.011971924 | 0.025385927 | -0.157500457 |
| 2094 | PITPNB   | 0.502014046 | 0.001312426 | 0.019799688 | 0.173911073  |
| 2095 | GPR137C  | 0.209565305 | 0.002529176 | 0.019799688 | -0.247443713 |
| 2096 | HIGD1A   | 0.177455116 | 3.00E-05    | 0.021403411 | -0.261115458 |
| 2097 | C3orf58  | 0.096418629 | 0.048311237 | 0.000470783 | -0.307314831 |
| 2098 | SLC9A9   | 0.081158355 | 0.046537515 | 0.001008665 | -0.319741171 |
| 2099 | YBEY     | 0.065733413 | 5.73E-05    | 0.001315844 | -0.332457206 |
| 2100 | SKA2     | 0.11109608  | 8.18E-05    | 0.002072486 | -0.296405704 |
| 2101 | LCK      | 0.174010795 | 0.000121194 | 0.003909206 | -0.262706351 |
| 2102 | CEP63    | 0.092241872 | 0.01059704  | 0.00519679  | -0.310674486 |
| 2103 | ABAT     | 0.090326873 | 0.009967298 | 0.001718755 | -0.312215221 |
| 2104 | TREX2    | 0.220393346 | 0.024272724 | 0.019799688 | -0.244390057 |
| 2105 | TRIM52   | 0.105807683 | 0.040278701 | 0.003351335 | -0.300388497 |
| 2106 | SH2D1A   | 0.158550754 | 1.29E-07    | 8.04E-08    | -0.270617439 |



|      |            |             |             |             |              |
|------|------------|-------------|-------------|-------------|--------------|
| 2107 | PPP1R2     | 0.922198188 | 0.003637254 | 0.048148626 | 0.032188206  |
| 2108 | TSPYL2     | 0.477597753 | 0.004011912 | 0.008702838 | 0.178964335  |
| 2109 | CSF1       | 0.164409949 | 0.011145323 | 0.019799688 | -0.267584563 |
| 2110 | SEMA4B     | 0.221668329 | 0.002954962 | 0.001315844 | -0.244095531 |
| 2111 | ZNF74      | 0.090413074 | 0.003847236 | 0.007130496 | -0.312145226 |
| 2112 | HGS        | 0.179423048 | 0.02171309  | 0.000121171 | -0.260128643 |
| 2113 | WASH3P     | 0.777181207 | 0.019614768 | 0.022192795 | 0.087143432  |
| 2114 | UBE2L3     | 0.326243703 | 0.045937255 | 0.024494487 | 0.230296985  |
| 2115 | NPIP4      | 0.259075595 | 0.001890721 | 0.006608985 | -0.240881289 |
| 2116 | C16orf54   | 0.943892999 | 0.041643215 | 0.007998599 | 0.022827067  |
| 2117 | TOR3A      | 0.127679566 | 0.005985728 | 0.024966998 | -0.287093599 |
| 2118 | GNG2       | 0.186187804 | 0.004218331 | 0.007346174 | -0.257024208 |
| 2119 | BTN3A2     | 0.101159428 | 0.000230869 | 0.008023017 | -0.303863683 |
| 2120 | NF2        | 0.29119399  | 0.007460554 | 0.007463156 | 0.241208894  |
| 2121 | CHP1       | 0.747395556 | 0.013253751 | 0.035259019 | 0.099226053  |
| 2122 | TTC24      | 0.466339751 | 0.047602716 | 0.002044906 | -0.177948604 |
| 2123 | ARHGAP11B  | 0.121824285 | 0.044061617 | 0.007709116 | -0.29056752  |
| 2124 | C19orf54   | 0.304887128 | 0.042234131 | 0.021974381 | -0.229972843 |
| 2125 | CNR2       | 0.57943198  | 0.012737005 | 0.001654817 | -0.159851604 |
| 2126 | SF3B3      | 0.11211849  | 0.000751148 | 0.003335986 | -0.295695729 |
| 2127 | HLA-DRB1   | 0.987506471 | 2.65E-05    | 0.000439097 | 0.005492733  |
| 2128 | SPATS2L    | 0.05073638  | 0.000140221 | 1.68E-06    | -0.343186513 |
| 2129 | LCOR       | 0.148785493 | 2.99E-05    | 0.036847386 | -0.275842496 |
| 2130 | AC005154.1 | 0.092311312 | 0.026803437 | 2.79E-05    | -0.310606663 |
| 2131 | POM121     | 0.434531185 | 0.010292083 | 0.03418987  | 0.19174471   |
| 2132 | CD55       | 0.336523483 | 0.006402693 | 0.00226423  | 0.226736891  |
| 2133 | ZNF34      | 0.222641784 | 0.011202859 | 0.019799688 | -0.243903328 |
| 2134 | SULT1A1    | 0.101809229 | 0.000135896 | 0.000875699 | -0.303377352 |
| 2135 | PRPF40A    | 0.057948772 | 0.006296526 | 0.000227164 | -0.338999305 |
| 2136 | HLA-DQA1   | 0.082413863 | 0.008494149 | 3.89E-05    | -0.318897937 |
| 2137 | ZSCAN16    | 0.05555047  | 0.000172677 | 0.019799688 | -0.340908201 |
| 2138 | ANXA6      | 0.08102058  | 0.017986326 | 0.03387025  | 0.333253755  |
| 2139 | DTHD1      | 0.310239789 | 0.002216979 | 2.88E-06    | -0.228508727 |
| 2140 | ARRDC1     | 0.309320466 | 0.009602127 | 0.000119057 | -0.228782222 |
| 2141 | SULT1A2    | 0.085925383 | 2.89E-06    | 0.000943034 | -0.315808039 |
| 2142 | ZNF655     | 0.077992961 | 0.00163028  | 0.013909421 | 0.335913505  |
| 2143 | ZNF181     | 0.8238799   | 0.009941183 | 0.000616058 | -0.067981965 |
| 2144 | ZNF347     | 0.222599899 | 0.005683063 | 0.025081888 | -0.243913146 |
| 2145 | SNHG12     | 0.173645161 | 0.002107151 | 0.002811291 | 0.271830947  |
| 2146 | ASPH       | 0.065399091 | 0.004409479 | 0.000118417 | -0.332726334 |
| 2147 | SMOC1      | 0.225856922 | 0.009691188 | 0.005148014 | -0.2433913   |
| 2148 | SMURF1     | 0.953933495 | 0.005940685 | 0.000151181 | 0.018509698  |
| 2149 | OPA1       | 0.304438546 | 0.027371141 | 0.005801235 | -0.230110769 |

|      |            |             |             |             |              |
|------|------------|-------------|-------------|-------------|--------------|
| 2150 | RNA5SP151  | 0.879953444 | 2.53E-06    | 0.027776967 | 0.04916576   |
| 2151 | AL512646.1 | 0.091321097 | 0.000441112 | 0.002870153 | 0.324113829  |
| 2152 | DAXX       | 0.367529512 | 0.004114209 | 0.011690867 | -0.21003564  |
| 2153 | HNRNPCP2   | 0.606701976 | 0.000167208 | 0.038303354 | -0.150636199 |
| 2154 | BRD2       | 0.315363645 | 0.008168503 | 0.007532436 | -0.226818241 |
| 2155 | HLA-DMA    | 0.916177419 | 0.000642525 | 0.006113988 | -0.034438616 |
| 2156 | PSMB8      | 0.188638722 | 0.025245036 | 0.025121213 | 0.264414983  |
| 2157 | NEU1       | 0.415241115 | 0.023012721 | 0.000554984 | 0.198541784  |
| 2158 | CARD16     | 0.641713528 | 0.005428944 | 0.008038618 | 0.141061776  |
| 2159 | HLA-F      | 0.141147655 | 0.00049245  | 0.000912901 | -0.27969916  |
| 2160 | TRIM13     | 0.582028691 | 0.003537886 | 6.58E-06    | -0.159020221 |
| 2161 | SLFN12L    | 0.392602108 | 0.00312345  | 0.024347719 | -0.201353216 |
| 2162 | COLQ       | 0.221885582 | 0.003662754 | 0.019799688 | -0.244063462 |
| 2163 | MIR16-1    | 0.091675241 | 0.003795716 | 0.019799688 | -0.311148977 |
| 2164 | MT-RNR1    | 0.729779938 | 0.006804308 | 0.043762105 | 0.106412692  |
| 2165 | TSN        | 0.746986175 | 0.000317065 | 0.004479284 | -0.098167805 |
| 2166 | IGLC2      | 0.876929076 | 0.012455351 | 0.007346174 | -0.050135827 |
| 2167 | TRAV24     | 0.669095543 | 0.001591101 | 0.00208965  | -0.128752235 |
| 2168 | TRAJ39     | 0.288993245 | 0.000122158 | 0.018590406 | 0.241867562  |
| 2169 | IGHG1      | 0.144922827 | 9.34E-07    | 1.02E-09    | -0.277623743 |
| 2170 | TAS2R14    | 0.210356796 | 0.001143581 | 0.019799688 | -0.247176895 |
| 2171 | MAP10      | 0.225039581 | 0.011318344 | 0.019799688 | -0.243508058 |
| 2172 | HNRNPA1P3  | 0.091833439 | 0.010141373 | 0.024970193 | -0.311014442 |
| 2173 | ARHGAP19   | 0.098149675 | 0.011918099 | 0.000502877 | -0.30603163  |
| 2174 | CLIC1      | 0.445890632 | 1.46E-05    | 0.001487846 | 0.188611332  |
| 2175 | STARD10    | 0.451467868 | 0.008256379 | 0.026890677 | -0.182482101 |
| 2176 | PHB2       | 0.222757938 | 0.009915013 | 0.021656597 | -0.243886456 |
| 2177 | CROCCP2    | 0.166459788 | 0.000171636 | 0.00208965  | -0.2665091   |
| 2178 | AL356432.2 | 0.337460072 | 0.005134755 | 7.18E-05    | -0.220181151 |
| 2179 | VPS52      | 0.36379067  | 0.047324998 | 0.016486065 | -0.211337259 |
| 2180 | HLA-DPB1   | 0.328571555 | 1.75E-10    | 1.96E-05    | -0.223110584 |
| 2181 | AL391244.1 | 0.365826968 | 0.028963025 | 0.026493922 | -0.210659103 |
| 2182 | PSME2P2    | 0.625005555 | 0.007113458 | 0.00055309  | -0.144370847 |
| 2183 | RUSC1-AS1  | 0.051000947 | 0.001438216 | 0.019799688 | -0.34293868  |
| 2184 | PSPHP1     | 0.81876261  | 0.04380513  | 0.000870571 | 0.070704776  |
| 2185 | AC016831.1 | 0.379051038 | 0.002792598 | 0.040790026 | 0.211357377  |
| 2186 | AL121983.2 | 0.710847548 | 0.004375463 | 0.026890677 | -0.112316485 |
| 2187 | AC004771.1 | 0.898585096 | 0.017430578 | 0.025385927 | -0.041795836 |
| 2188 | POLR2J2    | 0.951561549 | 0.014805615 | 0.006966605 | -0.01947202  |
| 2189 | AC012442.1 | 0.218965785 | 0.028455061 | 0.019799688 | -0.244708061 |
| 2190 | AC006460.1 | 0.18942794  | 0.003711257 | 0.027804498 | -0.255550093 |
| 2191 | PSMD10P1   | 0.08896023  | 0.028403979 | 0.005148014 | -0.313289879 |
| 2192 | KCNQ5-AS1  | 0.221324506 | 0.001467948 | 0.005148014 | -0.2441707   |

|      |            |             |             |             |              |
|------|------------|-------------|-------------|-------------|--------------|
| 2193 | PATL2      | 0.156886907 | 0.002276156 | 3.25E-07    | -0.271453072 |
| 2194 | AL022238.2 | 0.080717221 | 0.01788874  | 0.026890677 | -0.320109026 |
| 2195 | TMEM254-A  | 0.209337952 | 0.007165633 | 0.019799688 | -0.247518806 |
| 2196 | ATP5G2P3   | 0.06742996  | 0.001581184 | 0.019799688 | -0.330973206 |
| 2197 | AC011005.1 | 0.350125434 | 0.004658521 | 0.007325557 | -0.215884245 |
| 2198 | AC078875.1 | 0.069048955 | 5.18E-05    | 0.002053374 | -0.32948805  |
| 2199 | AC211433.1 | 0.097288113 | 0.003250121 | 0.007463156 | -0.306673099 |
| 2200 | TNF        | 0.162444448 | 1.18E-09    | 0.028159506 | 0.277906953  |
| 2201 | LINC00342  | 0.662464175 | 0.01120326  | 0.002100142 | -0.131184255 |
| 2202 | AP002381.1 | 0.139361656 | 0.006635421 | 0.026402336 | -0.280704313 |
| 2203 | C12orf75   | 0.126642573 | 0.023490434 | 0.002912582 | 0.298513919  |
| 2204 | H3F3AP4    | 0.099269585 | 0.010073903 | 0.021587071 | -0.305138406 |
| 2205 | AL035458.1 | 0.933022095 | 0.003664357 | 0.026890677 | 0.027442219  |
| 2206 | MTX1P1     | 0.089799381 | 0.008789647 | 0.023030104 | -0.312644329 |
| 2207 | ARHGEF38   | 0.166272584 | 0.001490139 | 0.005148014 | -0.266602445 |
| 2208 | RGL2       | 0.307487154 | 0.031872125 | 9.23E-06    | -0.229289516 |
| 2209 | AC078785.1 | 0.45408115  | 0.007228321 | 0.026890677 | -0.181602549 |
| 2210 | RDH14      | 0.349758854 | 0.017205404 | 0.007346174 | -0.215996816 |
| 2211 | AC018475.1 | 0.244201755 | 0.008458625 | 0.021403411 | -0.242726313 |
| 2212 | TRBV11-2   | 0.201495202 | 0.015924609 | 0.005148014 | -0.250434794 |
| 2213 | ZNF90P1    | 0.213726501 | 0.008642108 | 0.019799688 | -0.246067126 |
| 2214 | AC002467.1 | 0.079133388 | 0.000805185 | 0.005148014 | -0.321413784 |
| 2215 | EIF6       | 0.264620889 | 0.022061323 | 0.003420712 | -0.239566678 |
| 2216 | HLA-DMB    | 0.068721735 | 5.61E-05    | 0.01723886  | -0.329806075 |
| 2217 | GNG10      | 0.388377565 | 0.011766598 | 0.027804498 | -0.202826558 |
| 2218 | ZNF487     | 0.120163153 | 0.018237428 | 0.019799688 | -0.291469324 |
| 2219 | NEAT1      | 0.63414696  | 0.000821249 | 0.005801235 | 0.143996853  |
| 2220 | OIP5-AS1   | 0.082280348 | 0.000251723 | 3.64E-05    | -0.31902442  |
| 2221 | AC008780.2 | 0.053904615 | 0.044929816 | 0.001968785 | -0.342263401 |
| 2222 | AC093809.1 | 0.958782369 | 0.005115399 | 0.003810718 | 0.016448265  |
| 2223 | AC104806.1 | 0.719603687 | 0.001268098 | 0.013407511 | -0.108732609 |
| 2224 | ZNF718     | 0.075865602 | 0.019874121 | 0.001315844 | -0.324213411 |
| 2225 | TRAJ55     | 0.415896471 | 0.003703665 | 0.007709116 | -0.193483813 |
| 2226 | AC016065.2 | 0.089606243 | 0.005375835 | 0.025081888 | -0.312789637 |
| 2227 | LINC01289  | 0.226647781 | 0.006925287 | 0.005148014 | -0.24328094  |
| 2228 | AC026191.1 | 0.222292532 | 0.029977256 | 0.019799688 | -0.243976267 |
| 2229 | AC138866.2 | 0.719793574 | 0.002279326 | 0.000158286 | -0.108653853 |
| 2230 | TMEM9B-AS  | 0.209281958 | 0.001861385 | 0.005148014 | -0.247538891 |
| 2231 | AP006621.3 | 0.107994066 | 0.000422603 | 0.001315844 | -0.298760477 |
| 2232 | NPIP8      | 0.852356669 | 0.016375686 | 0.007962594 | 0.057303098  |
| 2233 | AC003002.1 | 0.930312165 | 0.005689531 | 0.024743847 | 0.02864569   |
| 2234 | USP30-AS1  | 0.055705259 | 0.008890163 | 0.024970193 | -0.340780524 |
| 2235 | AC010186.2 | 0.07118995  | 0.029586713 | 0.025719797 | -0.327750095 |

|      |            |             |             |             |              |
|------|------------|-------------|-------------|-------------|--------------|
| 2236 | LINC00641  | 0.265204091 | 0.001189562 | 0.027804498 | -0.239441784 |
| 2237 | AL049869.3 | 0.75628704  | 0.006264869 | 0.007962594 | -0.094420439 |
| 2238 | AC009554.1 | 0.210223408 | 0.022535289 | 0.019799688 | -0.247219182 |
| 2239 | AC007342.1 | 0.088893883 | 0.001348374 | 0.019799688 | -0.313353396 |
| 2240 | AL356432.3 | 0.129318635 | 0.020172039 | 0.000256453 | -0.286101139 |
| 2241 | AC110079.1 | 0.194563317 | 0.040527561 | 0.026402336 | -0.253420163 |
| 2242 | AC020978.4 | 0.110893757 | 0.000495332 | 0.000624498 | -0.296558441 |
| 2243 | AP001486.2 | 0.054895587 | 0.000263074 | 7.91E-05    | -0.341460439 |
| 2244 | AC138304.1 | 0.225604223 | 0.018337125 | 0.019799688 | -0.243425382 |
| 2245 | PECAM1     | 0.783424468 | 0.000432297 | 0.038397866 | -0.083672729 |
| 2246 | SEC22B     | 0.74077574  | 0.048658329 | 0.008158814 | 0.10186385   |
| 2247 | STRADA     | 0.81533609  | 0.003881938 | 0.002876692 | -0.071512107 |
| 2248 | MTRNR2L12  | 0.091563064 | 0.000515714 | 0.04283937  | 0.323907351  |
| 2249 | LINC00528  | 0.943744461 | 0.032379835 | 0.000252827 | 0.022888626  |
| 2250 | AC024451.4 | 0.219683069 | 0.000448067 | 0.019799688 | -0.244540021 |
| 2251 | AC092687.3 | 0.05437908  | 0.007023528 | 0.019799688 | -0.341880013 |
| 2252 | AL159169.2 | 0.118377186 | 0.001134684 | 0.019799688 | -0.292595616 |
| 2253 | AL122035.2 | 0.09688817  | 0.000854564 | 0.019799688 | -0.306945123 |
| 2254 | AC058791.1 | 0.719767944 | 5.90E-06    | 0.001560155 | -0.108662403 |
| 2255 | SYNRG      | 0.780878638 | 0.043964183 | 0.017408349 | -0.084672541 |
| 2256 | AC243654.2 | 0.196714728 | 0.004879441 | 0.026890677 | -0.252494506 |
| 2257 | CCL4L2     | 0.97371659  | 0.022585965 | 0.002158973 | -0.010441715 |
| 2258 | AC244472.3 | 0.671160596 | 0.00897992  | 0.00215646  | 0.130048592  |
| 2259 | CCL3       | 0.135871788 | 9.91E-08    | 3.04E-09    | -0.282176838 |
| 2260 | SMG6-IT1   | 0.189697336 | 0.000844115 | 0.005148014 | -0.255440447 |
| 2261 | AP003108.4 | 0.210786977 | 0.006564071 | 0.025081888 | -0.247045714 |
| 2262 | AC069547.1 | 0.076735181 | 0.003293996 | 0.019799688 | -0.32337207  |
| 2263 | AC012676.5 | 0.120934474 | 0.000737856 | 0.00208965  | -0.291024601 |
| 2264 | AC245088.3 | 0.220388959 | 0.02405937  | 0.001315844 | -0.244390406 |
